# Supplementary material for: Polygenic enrichment distinguishes disease associations of individual cells in single-cell RNA-seq data
Source: Research Square preprint supplement (doi:10.21203/rs.3.rs-933790/v1), 2021-10-05
Supplement: Supplementary file 2 [file 4f36fc618bd6b11eb57cfa24.xlsx]

## Sheet: ST1 Trait info
Trait Name	Trait_Identifier	Code	Category	Reference	N	M	h2g	sd	Z	Intercept	log10 Me Common
Crohn's Disease	PASS_CD_deLange2017	CD	blood/immune	de Lange et al. 2017 Nat Genet	40266	1150097	0.4152	0.0361	11.5014	1.101
Celiac Disease	PASS_Celiac	Celiac	blood/immune	Dubois et al., 2010 Nat Genet	15283	245449	0.3296	0.0697	4.72884	1.0528
Inflammatory Bowel Disease	PASS_IBD_deLange2017	IBD	blood/immune	de Lange et al. 2017 Nat Genet	59957	1150510	0.3206	0.0243	13.1934	1.1216	3.60 (0.04)
Systemic Lupus Erythematosus	PASS_Lupus	SLE	blood/immune	Bentham et al., 2015 Nat Genet	14267	654940	0.4584	0.0957	4.78997	1.0899
Multiple Sclerosis	PASS_Multiple_sclerosis	MS	blood/immune	IMS Genetics Consortium, 2011 Nature	27148	227549	0.0812	0.0373	2.17694	1.0416
Primary Biliary Cirrhosis	PASS_Primary_biliary_cirrhosis	PBC	blood/immune	Cordell et al., 2015 Nat Commun	13239	525775	0.4585	0.0818	5.60513	0.9939
Rheumatoid Arthritis	PASS_Rheumatoid_Arthritis	RA	blood/immune	Okada et al., 2014 Nature	37681.4	562682	0.187	0.0249	7.51004	1.0256	3.03 (0.10)
Ulcerative Colitis	PASS_UC_deLange2017	UC	blood/immune	de Lange et al. 2017 Nat Genet	45975	1150227	0.2805	0.0263	10.6654	1.0825
Eosinophil Count	UKB_460K.blood_EOSINOPHIL_COUNT	EOS	blood/immune	UK Biobank	439938	1187057	0.2296	0.0117	19.6239	1.1467	3.05 (0.04)
Lymphocyte Count	UKB_460K.blood_LYMPHOCYTE_COUNT	LYM	blood/immune	UK Biobank	443940	1187057	0.2404	0.0114	21.0877	1.1207
Mean Corpular Hemoglobin	UKB_460K.blood_MEAN_CORPUSCULAR_HEMOGLOBIN	MCH	blood/immune	UK Biobank	443686	1187057	0.2373	0.0132	17.9773	1.2455
Monocyte Count	UKB_460K.blood_MONOCYTE_COUNT	MONO	blood/immune	UK Biobank	442620	1187057	0.2468	0.0147	16.7891	1.211
Platelet Count	UKB_460K.blood_PLATELET_COUNT	PLT	blood/immune	UK Biobank	444382	1187057	0.3505	0.0165	21.2424	1.2651
Red Blood Cell Distribution Width	UKB_460K.blood_RBC_DISTRIB_WIDTH	RDW	blood/immune	UK Biobank	442700	1187057	0.2172	0.0122	17.8033	1.1432	2.70 (0.05)
Red Blood Cell Count	UKB_460K.blood_RED_COUNT	RBC	blood/immune	UK Biobank	445174	1187057	0.2613	0.012	21.775	1.1818	2.67 (0.18)
White Blood Cell Count	UKB_460K.blood_WHITE_COUNT	WBC	blood/immune	UK Biobank	444502	1187057	0.2273	0.0083	27.3855	1.1154	3.30 (0.10)
Auto Immune Traits	UKB_460K.disease_AID_ALL	AIT	blood/immune	UK Biobank	459324	1187057	0.0391	0.0028	13.9643	1.0187	2.93 (0.05)
Eczema	UKB_460K.disease_ALLERGY_ECZEMA_DIAGNOSED	Eczema	blood/immune	UK Biobank	458699	1187057	0.0847	0.0058	14.6034	1.035	3.20 (0.05)
Asthma	UKB_460K.disease_ASTHMA_DIAGNOSED	ASM	blood/immune	UK Biobank	458699	1187057	0.0666	0.0048	13.875	1.0288	3.12 (0.03)
Hypothyroidism	UKB_460K.disease_HYPOTHYROIDISM_SELF_REP	HT	blood/immune	UK Biobank	459324	1187057	0.0546	0.0036	15.1667	1.0329
Respiratory and Ear-nose-throat Diseases	UKB_460K.disease_RESPIRATORY_ENT	RR-ENT	blood/immune	UK Biobank	459324	1187057	0.0593	0.0042	14.119	1.0272
Attention Deficit Hyperactivity Disorder	PASS_ADHD_Demontis2018	ADHD	brain	Demontis et al. 2019 Nat Genet	55374	1059324	0.2478	0.0213	11.6338	1.03
Alzheimer's Disease	PASS_Alzheimers_Jansen2019	AD	brain	Jansen et al. 2019 Nat Genet	433886	1165655	0.0141	0.0018	7.83333	1.0044	2.90 (0.11)
Bipolar Disorder	PASS_BIP_Stahl2019	BP	brain	Stahl et al. 2019 Nat Genet	46423	1184385	0.3838	0.0205	18.722	1.0331
Drinks per Week	PASS_DrinksPerWeek_Liu2019	Drink per week	brain	Liu et al. 2019 Nat Genet	527299	352681	0.0462	0.0032	14.4375	0.9425
General Risk Tolerance	PASS_GeneralRiskTolerance_KarlssonLinner2019	GRT	brain	Karlsson Linner et al. 2019 Nat Genet	466571	629328	0.0514	0.0028	18.3571	1.0214
Insomnia	PASS_Insomnia_Jansen2019	Insomnia	brain	Jansen et al. 2019 Nat Genet	383948	1117678	0.044	0.0025	17.6	1.0291
Intelligence	PASS_Intelligence_SavageJansen2018	Intel	brain	Savage et al. 2018 Nat Genet	264193	1134136	0.1859	0.0064	29.0469	1.0888
Major Depressive Disorder	PASS_MDD_Howard2019	MDD	brain	Howard et al. 2019 Nat Neuro	378761	1158834	0.0794	0.0033	24.0606	1.0186
Reaction Time	PASS_ReactionTime_Davies2018	Reaction time	brain	Davies et al. 2018 Nat Comm	300486	1184171	0.0812	0.0036	22.5556	1.047
Subject Well Being	PASS_SWB	SWB	brain	Okbay et al., 2016 Nat Genet	298420	477900	0.0261	0.0054	4.83333	2.035
Schizophrenia	PASS_Schizophrenia_Pardinas2018	SCZ	brain	Pardinas et al. 2018 Nat Genet	94437	984069	0.4515	0.0226	19.9779	1.1114
Sleep Duration	PASS_SleepDuration_Dashti2019	Sleep duration	brain	Dashti et al. 2019 Nat Comm	446118	1186994	0.0708	0.0036	19.6667	1.0385
Verbal Numeric Reasoning	PASS_VerbalNumericReasoning_Davies2018	VNR	brain	Davies et al. 2018 Nat Comm	168033	1184171	0.2079	0.0081	25.6667	1.0512
Worry	PASS_Worry_Nagel2018	Worry	brain	Nagel et al. 2018 Nat Genet	345850	1122297	0.0922	0.0038	24.2632	1.0333
Body Mass Index	UKB_460K.body_BMIz	BMI	brain	UK Biobank	457824	1187057	0.2779	0.0067	41.4776	1.1324	3.78 (0.12)
College Education	UKB_460K.cov_EDU_COLLEGE	ECOL	brain	UK Biobank	454813	1187057	0.1395	0.0041	34.0244	1.1278	4.08 (0.05)
Years of Education	UKB_460K.cov_EDU_YEARS	EY	brain	UK Biobank	454813	1187057	0.136	0.0038	35.7895	1.114
Smoking Status	UKB_460K.cov_SMOKING_STATUS	Smoking	brain	UK Biobank	457683	1187057	0.0999	0.0034	29.3824	1.0597	4.11 (0.02)
Neuroticism	UKB_460K.mental_NEUROTICISM	NRT	brain	UK Biobank	372066	1187057	0.1139	0.004	28.475	1.0699	3.99 (0.23)
Morning Person	UKB_460K.other_MORNINGPERSON	Morning person	brain	UK Biobank	410520	1187057	0.1061	0.0043	24.6744	1.0525	4.02 (0.02)
Number Children Even Born (pooled)	UKB_460K.repro_NumberChildrenEverBorn_Pooled	NCH	brain	UK Biobank	456500	1187057	0.0386	0.0023	16.7826	1.0327	4.50 (0.13)
Atrial Fibrillation	PASS_AtrialFibrillation_Nielsen2018	AF	heart	Nielsen et al. 2018 AJHG	1030836	1186534	0.0218	0.0013	16.7692	1.0485
Coronary Artery Disease	PASS_Coronary_Artery_Disease	CAD	heart	Schunkert et al., 2011 Nat Genet	77210	925224	0.0746	0.0124	6.01613	1.0303
Diastolic Blood Pressure	UKB_460K.bp_DIASTOLICadjMEDz	DBP	heart	UK Biobank	422771	1187057	0.233	0.0084	27.7381	1.12
Systolic Blood Pressure	UKB_460K.bp_SYSTOLICadjMEDz	SBP	heart	UK Biobank	422771	1187057	0.2319	0.0084	27.6071	1.1199	3.81 (0.02)
Cardiovascular Diseases	UKB_460K.disease_CARDIOVASCULAR	CVD	heart	UK Biobank	459324	1187057	0.1208	0.0043	28.093	1.0761
Hyperthension	UKB_460K.disease_HYPERTENSION_DIAGNOSED	HTN	heart	UK Biobank	458554	1187057	0.1411	0.0052	27.1346	1.0828
Fasting Glucose	PASS_FastingGlucose_Manning	FG	metabolic	Manning et. al., 2012 Nat Genet	58074	1130214	0.0824	0.0154	5.35065	1.0037
AlanineAminotransferase	UKB_460K.biochemistry_AlanineAminotransferase	ALT	metabolic	UK Biobank	431882	1187344	0.1099	0.0057	19.2807	1.078
AlkalinePhosphatase	UKB_460K.biochemistry_AlkalinePhosphatase	ALP	metabolic	UK Biobank	433862	1187344	0.2348	0.016	14.675	1.1862
Cholesterol	UKB_460K.biochemistry_Cholesterol	TC	metabolic	UK Biobank	435137	1187344	0.1307	0.0112	11.6696	1.0773
Glucose	UKB_460K.biochemistry_Glucose	Glucose	metabolic	UK Biobank	393767	1187344	0.0627	0.0058	10.8103	1.055
HDLcholesterol	UKB_460K.biochemistry_HDLcholesterol	HDL	metabolic	UK Biobank	397612	1187344	0.2652	0.0163	16.2699	1.1384
HbA1c	UKB_460K.biochemistry_HbA1c	HbA1c	metabolic	UK Biobank	411840	1187344	0.1834	0.0096	19.1042	1.155
LDLdirect	UKB_460K.biochemistry_LDLdirect	LDL	metabolic	UK Biobank	434347	1187344	0.1084	0.0104	10.4231	1.0887
Sex Hormone Binding Globulin	UKB_460K.biochemistry_SHBG	SHBG	metabolic	UK Biobank	391848	1187344	0.1781	0.0105	16.9619	1.1699
TestosteroneMale	UKB_460K.biochemistry_Testosterone_Male	TST	metabolic	UK Biobank	196813	1187344	0.184	0.0111	16.5766	1.0753
TotalBilirubin	UKB_460K.biochemistry_TotalBilirubin	TBIL	metabolic	UK Biobank	429423	1187344	0.0841	0.0076	11.0658	1.136
TotalProtein	UKB_460K.biochemistry_TotalProtein	TP	metabolic	UK Biobank	397652	1187344	0.1811	0.0075	24.1467	1.1184
Triglycerides	UKB_460K.biochemistry_Triglycerides	TG	metabolic	UK Biobank	431952	1187344	0.1586	0.011	14.4182	1.1205
Type 1 Diabetes	PASS_Type_1_Diabetes	T1D	other	Bradfield et al., 2011 Plos Genet	26890	915518	0.131	0.0458	2.86026	1.1018
Type 2 Diabetes	PASS_Type_2_Diabetes	T2D	other	Morris et al., 2012 Nat Genet	60786.2	968539	0.095	0.0147	6.46259	1.0184	2.85 (0.14)
Heel T Score	UKB_460K.bmd_HEEL_TSCOREz	BMD-HT	other	UK Biobank	445921	1187057	0.3549	0.0173	20.5145	1.2354	2.90 (0.08)
Balding Type I	UKB_460K.body_BALDING1	Balding	other	UK Biobank	208336	1187057	0.2234	0.0152	14.6974	1.1099
Height	UKB_460K.body_HEIGHTz	Height	other	UK Biobank	458303	1187057	0.674	0.0261	25.8238	1.4625	3.56 (0.02)
Waist-hip Ratio	UKB_460K.body_WHRadjBMIz	WHR	other	UK Biobank	458417	1187057	0.1705	0.0072	23.6806	1.0845
Breast Cancer	UKB_460K.cancer_BREAST	Breast cancer	other	UK Biobank	459324	1187057	0.0178	0.0026	6.84615	1.0126
Basal Metabolic Rate	UKB_460K.impedance_BASAL_METABOLIC_RATEz	BMR	other	UK Biobank	451316	1187057	0.3569	0.0099	36.0505	1.1948
FEV1-FVC Ratio	UKB_460K.lung_FEV1FVCzSMOKE	FEV1/FVC	other	UK Biobank	371949	1187057	0.2763	0.0117	23.6154	1.1129	3.38 (0.05)
Forced Vital Capacity (FVC)	UKB_460K.lung_FVCzSMOKE	FVC	other	UK Biobank	371949	1187057	0.2336	0.0072	32.4444	1.1046
Hair Color	UKB_460K.pigment_HAIR	Hair color	other	UK Biobank	452720	1187057	0.1658	0.0211	7.85782	1.228
Age at Menarche	UKB_460K.repro_MENARCHE_AGE	MNR	other	UK Biobank	242278	1187057	0.253	0.0103	24.5631	1.0607
Age at Menopause	UKB_460K.repro_MENOPAUSE_AGE	MNP	other	UK Biobank	143025	1187057	0.1093	0.0099	11.0404	1.0421

## Sheet: ST3 TMS FACS info
id	category	code	n_cell	tissue_prop
megakaryocyte-erythroid_progenitor_cell	blood		80	Marrow(100%)
proerythroblast	blood		107	Spleen(100%)
hematopoietic_stem_cell	blood		3306	Marrow(100%)
late_pro-B_cell	immune		411	Marrow(100%)
granulocyte_monocyte_progenitor_cell	immune	GMP	250	Marrow(100%)
lung_macrophage	immune		9	Lung(100%)
monocyte	immune		1281	Heart(100%)
classical_monocyte	immune		202	Lung(100%)
granulocyte	immune		2966	Marrow(97%),Trachea(1%)
granulocytopoietic_cell	immune		483	Marrow(100%)
myeloid_cell	immune		2556	SCAT(33%),BAT(29%),GAT(28%),MAT(8%)
neutrophil	immune		153	Lung(80%),Liver(19%)
early_pro-B_cell	immune		72	Marrow(100%)
intermediate_monocyte	immune		12	Lung(100%)
non-classical_monocyte	immune		149	Lung(100%)
myeloid_leukocyte	immune		209	Liver(100%)
promonocyte	immune		1015	Marrow(100%)
leukocyte	immune		158	Pancreas(75%),Lung(24%)
lymphoid_progenitor_cell	immune		13	Marrow(100%)
mucus_secreting_cell	immune		73	Trachea(100%)
lymphocyte	immune		10	Lung(100%)
basophil	immune		71	Marrow(100%)
B_cell	immune		5629	Spleen(50%),BAT(9%),MAT(6%),Heart(6%),SCAT(5%),GAT(5%),Lung(4%),Liver(3%),Limb_Muscle(3%),Diaphragm(2%),Kidney(1%)
naive_B_cell	immune		2959	Marrow(100%)
immature_B_cell	immune		589	Marrow(100%)
precursor_B_cell	immune		856	Marrow(100%)
thymocyte	immune		1625	Thymus(100%)
regulatory_T_cell	immune	regulatory T	47	Lung(100%)
DN4_thymocyte	immune		1756	Thymus(100%)
CD8-positive_alpha-beta_T_cell	immune	CD8+ $\alpha$-$\beta$ T	1070	Spleen(33%),MAT(19%),GAT(12%),Lung(11%),Brain_Non-Myeloid(9%),SCAT(8%),Liver(5%)
CD4-positive_alpha-beta_T_cell	immune	CD4+ $\alpha$-$\beta$ T	1170	Spleen(35%),Marrow(23%),MAT(14%),GAT(11%),SCAT(5%),Lung(5%),Liver(3%)
T_cell	immune		1329	Trachea(21%),Heart(14%),BAT(11%),Limb_Muscle(10%),SCAT(8%),GAT(6%),Kidney(5%),Brain_Non-Myeloid(5%),MAT(4%),Diaphragm(4%),Liver(3%),Lung(2%),Skin(2%)
mature_NK_T_cell	immune		199	Liver(88%),Brain_Non-Myeloid(8%),Lung(3%)
NK_cell	immune		877	Marrow(53%),Spleen(9%),SCAT(8%),GAT(6%),Lung(5%),BAT(5%),MAT(5%),Liver(4%)
mature_alpha-beta_T_cell	immune		330	Marrow(100%)
dendritic_cell	immune	dendritic	62	Lung(100%)
fibrocyte	immune		44	Aorta(100%)
myeloid_dendritic_cell	immune		373	Lung(100%)
plasmacytoid_dendritic_cell	immune		6	Lung(100%)
macrophage	immune		2447	Marrow(17%),Trachea(17%),Thymus(15%),Limb_Muscle(12%),Brain_Myeloid(11%),MAT(9%),Kidney(6%),Heart(3%),Diaphragm(3%),Aorta(1%),Brain_Non-Myeloid(1%)
oligodendrocyte	brain		2094	Brain_Non-Myeloid(100%)
Bergmann_glial_cell	brain	Bergmann glial	54	Brain_Non-Myeloid(100%)
astrocyte	brain		592	Brain_Non-Myeloid(100%)
neuronal_stem_cell	brain		97	Brain_Non-Myeloid(100%)
oligodendrocyte_precursor_cell	brain	OPC	312	Brain_Non-Myeloid(100%)
medium_spiny_neuron	brain	MSN	103	Brain_Non-Myeloid(100%)
interneuron	brain		240	Brain_Non-Myeloid(100%)
neuron	brain		484	Brain_Non-Myeloid(100%)
ependymal_cell	brain		55	Brain_Non-Myeloid(100%)
neuroepithelial_cell	brain		151	Brain_Non-Myeloid(100%)
endothelial_cell	brain		4928	Brain_Non-Myeloid(45%),SCAT(9%),Limb_Muscle(9%),BAT(8%),GAT(6%),MAT(5%),Trachea(4%),Diaphragm(4%),Pancreas(4%),Thymus(1%)
brain_pericyte	others		484	Brain_Non-Myeloid(100%)
hepatocyte	others		1162	Liver(100%)
endothelial_cell_of_hepatic_sinusoid	others		617	Liver(100%)
Kupffer_cell	others		262	Liver(100%)
epithelial_cell_of_proximal_tubule	others		393	Kidney(100%)
kidney_collecting_duct_epithelial_cell	others		445	Kidney(100%)
kidney_loop_of_Henle_ascending_limb_epithelial_cell	others		146	Kidney(100%)
kidney_interstitial_fibroblast	others		16	Kidney(100%)
mesangial_cell	others		93	Kidney(100%)
kidney_collecting_duct_principal_cell	others		157	Kidney(100%)
fenestrated_cell	others		268	Kidney(100%)
atrial_myocyte	others		403	Heart(100%)
ventricular_myocyte	others		147	Heart(100%)
smooth_muscle_cell	others		103	Heart(100%)
valve_cell	others		315	Heart(100%)
endothelial_cell_of_coronary_artery	others		2694	Heart(100%)
endocardial_cell	others		375	Heart(100%)
fibroblast_of_cardiac_tissue	others		3926	Heart(94%),Aorta(5%)
pericyte_cell	others		38	Lung(100%)
lung_neuroendocrine_cell	others		4	Lung(100%)
endothelial_cell_of_lymphatic_vessel	others		99	Lung(100%)
club_cell_of_bronchiole	others		22	Lung(100%)
pulmonary_interstitial_fibroblast	others		50	Lung(100%)
adventitial_cell	others		289	Lung(100%)
vein_endothelial_cell	others		152	Lung(100%)
type_II_pneumocyte	others		167	Lung(100%)
fibroblast_of_lung	others		483	Lung(100%)
type_I_pneumocyte	others		4	Lung(100%)
smooth_muscle_cell_of_the_pulmonary_artery	others		111	Lung(100%)
respiratory_basal_cell	others		34	Lung(100%)
bronchial_smooth_muscle_cell	others		2117	Lung(100%)
plasma_cell	others		25	Lung(100%)
ciliated_columnar_cell_of_tracheobronchial_tree	others		70	Lung(74%),Trachea(25%)
secretory_cell	others		563	Large_Intestine(100%)
enterocyte_of_epithelium_of_large_intestine	others		2542	Large_Intestine(100%)
intestinal_crypt_stem_cell	others		1579	Large_Intestine(100%)
large_intestine_goblet_cell	others		1587	Large_Intestine(100%)
Brush_cell_of_epithelium_proper_of_large_intestine	others		175	Large_Intestine(100%)
enteroendocrine_cell	others		161	Large_Intestine(100%)
epithelial_cell_of_large_intestine	others		1704	Large_Intestine(100%)
mesenchymal_stem_cell	others		1429	Limb_Muscle(65%),Diaphragm(34%)
skeletal_muscle_satellite_cell	others		2725	Limb_Muscle(67%),Diaphragm(32%)
stromal_cell	others		340	Mammary_Gland(100%)
basal_cell	others		2139	Mammary_Gland(100%)
luminal_epithelial_cell_of_mammary_gland	others		768	Mammary_Gland(100%)
mesenchymal_stem_cell_of_adipose	others		4733	SCAT(33%),GAT(33%),MAT(29%),BAT(4%)
epithelial_cell	others		426	SCAT(42%),BAT(26%),GAT(14%),MAT(12%),Aorta(4%)
bulge_keratinocyte	others		2604	Skin(100%)
epidermal_cell	others		492	Skin(100%)
keratinocyte_stem_cell	others		35	Skin(100%)
epithelial_cell_of_thymus	others		165	Thymus(100%)
basal_cell_of_epidermis	others		4214	Tongue(60%),Skin(39%)
keratinocyte	others		1215	Tongue(98%),Trachea(1%)
chondrocyte	others		275	Trachea(100%)
smooth_muscle_cell_of_trachea	others		125	Trachea(100%)
basal_epithelial_cell_of_tracheobronchial_tree	others		404	Trachea(100%)
fibroblast	others		1330	Trachea(92%),Thymus(5%),Skin(1%)
aortic_endothelial_cell	others		467	Aorta(100%)
professional_antigen_presenting_cell	others		130	Aorta(100%)
bladder_cell	others		1012	Bladder(100%)
bladder_urothelial_cell	others		1420	Bladder(100%)
microglial_cell	others		13268	Brain_Myeloid(98%),Brain_Non-Myeloid(1%)
pancreatic_A_cell	others		521	Pancreas(100%)
pancreatic_B_cell	others	pancreatic beta	1342	Pancreas(100%)
pancreatic_D_cell	others		191	Pancreas(100%)
pancreatic_ductal_cell	others		313	Pancreas(100%)
pancreatic_PP_cell	others	pancreatic PP	71	Pancreas(100%)
pancreatic_stellate_cell	others		48	Pancreas(100%)
pancreatic_acinar_cell	others		576	Pancreas(100%)

## Sheet: ST4 TMS droplet info
id	category	code	n_cell	tissue_prop
proerythroblast	blood		4570	Marrow(79%),Spleen(20%)
erythroblast	blood		2918	Marrow(80%),Spleen(15%),Fat(3%)
megakaryocyte-erythroid_progenitor_cell	blood		2712	Marrow(69%),Spleen(30%)
hematopoietic_precursor_cell	blood		2144	Marrow(100%)
plasma_cell	blood		1621	Spleen(49%),Marrow(27%),Kidney(20%),Lung(3%)
erythroid_progenitor	blood		409	Marrow(100%)
erythrocyte	blood		356	Heart_and_Aorta(100%)
blood_cell	blood		88	Trachea(100%)
hematopoietic_stem_cell	blood		36	Large_Intestine(100%)
B_cell	immune		30720	Spleen(71%),Kidney(10%),Mammary_Gland(5%),Limb_Muscle(4%),Lung(4%),Fat(2%)
granulocyte	immune		12596	Marrow(87%),Spleen(9%),Trachea(3%)
T_cell	immune		11416	Spleen(41%),Mammary_Gland(28%),Kidney(11%),Limb_Muscle(10%),Fat(4%),Lung(2%)
classical_monocyte	immune		7922	Lung(100%)
granulocytopoietic_cell	immune		7599	Marrow(100%)
macrophage	immune		7184	Limb_Muscle(34%),Spleen(19%),Kidney(19%),Marrow(13%),Mammary_Gland(7%),Trachea(4%)
mature_NK_T_cell	immune		2962	Spleen(85%),Lung(14%)
promonocyte	immune		2827	Marrow(100%)
NK_cell	immune		2485	Lung(48%),Liver(22%),Spleen(21%),Marrow(5%),Kidney(2%)
professional_antigen_presenting_cell	immune		2482	Thymus(100%)
monocyte	immune		2393	Marrow(100%)
DN4_thymocyte	immune		2000	Thymus(100%)
thymocyte	immune		1892	Thymus(100%)
myeloid_cell	immune		1871	Fat(100%)
immature_T_cell	immune		1784	Thymus(100%)
intermediate_monocyte	immune		1749	Lung(100%)
naive_T_cell	immune		1568	Marrow(100%)
alveolar_macrophage	immune		1366	Lung(100%)
lung_macrophage	immune		1157	Lung(100%)
lymphocyte	immune		1591	Kidney(96%),Fat(3%)
non-classical_monocyte	immune		1010	Lung(100%)
double_negative_T_cell	immune		971	Thymus(100%)
precursor_B_cell	immune		915	Marrow(100%)
CD8-positive_alpha-beta_T_cell	immune	CD8+ $\alpha$-$\beta$ T	870	Lung(100%)
immature_B_cell	immune		826	Marrow(100%)
neutrophil	immune		552	Lung(100%)
CD4-positive_alpha-beta_T_cell	immune	CD4+ $\alpha$-$\beta$ T	551	Lung(100%)
late_pro-B_cell	immune		532	Marrow(100%)
naive_B_cell	immune		398	Marrow(100%)
myeloid_leukocyte	immune		307	Liver(100%)
basophil	immune		254	Lung(51%),Marrow(48%)
myeloid_dendritic_cell	immune		245	Lung(100%)
DN3_thymocyte	immune		146	Thymus(100%)
macrophage_dendritic_cell_progenitor	immune		148	Spleen(100%)
regulatory_T_cell	immune	Regulatory T	123	Lung(100%)
plasmacytoid_dendritic_cell	immune		116	Lung(64%),Liver(35%)
immature_NKT_cell	immune		84	Spleen(100%)
stromal_cell	immune		2783	Mammary_Gland(100%)
luminal_epithelial_cell_of_mammary_gland	immune		1903	Mammary_Gland(100%)
mesenchymal_stem_cell_of_adipose	immune		1893	Fat(100%)
pancreatic_B_cell	pancreas	pancreatic B	2674	Pancreas(100%)
pancreatic_acinar_cell	pancreas		2141	Pancreas(100%)
pancreatic_ductal_cel	pancreas		338	Pancreas(100%)
pancreatic_D_cell	pancreas		272	Pancreas(100%)
pancreatic_stellate_cell	pancreas		21	Pancreas(100%)
pancreatic_A_cell	pancreas		310	Pancreas(100%)
pancreatic_PP_cell	pancreas	pancreatic PP	157	Pancreas(100%)
endothelial_cell_of_coronary_artery	heart		3293	Heart_and_Aorta(100%)
fibroblast_of_cardiac_tissue	heart		2409	Heart_and_Aorta(100%)
leukocyte	heart		1500	Heart_and_Aorta(63%),Bladder(24%),Pancreas(12%)
smooth_muscle_cell	heart		1601	Limb_Muscle(72%),Heart_and_Aorta(27%)
endocardial_cell	heart		678	Heart_and_Aorta(100%)
cardiac_neuron	heart		81	Heart_and_Aorta(100%)
mast_cell	heart		76	Heart_and_Aorta(100%)
cardiomyocyte	heart		334	Heart_and_Aorta(100%)
mesenchymal_stem_cell	muscle / skin		13037	Limb_Muscle(100%)
basal_cell_of_epidermis	muscle / skin		11431	Tongue(81%),Skin(18%)
keratinocyte	muscle / skin		11142	Tongue(100%)
endothelial_cell	muscle / skin		9894	Limb_Muscle(69%),Fat(14%),Mammary_Gland(6%),Trachea(4%),Bladder(3%),Pancreas(1%)
bladder_urothelial_cell	muscle / skin		5231	Bladder(100%)
bladder_cell	muscle / skin		3003	Bladder(100%)
skeletal_muscle_satellite_cell	muscle / skin		2055	Limb_Muscle(100%)
fibroblast	muscle / skin		1813	Trachea(91%),Kidney(8%)
mesenchymal_progenitor_cell	muscle / skin		1676	Trachea(100%)
chondrocyte	muscle / skin		1630	Trachea(100%)
epidermal_cell	muscle / skin		1735	Skin(100%)
basal_cell	muscle / skin		1587	Mammary_Gland(100%)
mesenchymal_cell	muscle / skin		879	Trachea(100%)
basal_epithelial_cell_of_tracheobronchial_tree	muscle / skin		521	Trachea(100%)
keratinocyte_stem_cell	muscle / skin		418	Skin(100%)
epithelial_cell	muscle / skin		338	Trachea(57%),Fat(42%)
Schwann_cell	muscle / skin		274	Limb_Muscle(100%)
skeletal_muscle_cell	muscle / skin		192	Limb_Muscle(100%)
Langerhans_cell	muscle / skin		175	Tongue(100%)
stem_cell_of_epidermis	muscle / skin		171	Skin(100%)
smooth_muscle_cell_of_trachea	muscle / skin		127	Trachea(100%)
neuroendocrine_cell	muscle / skin		48	Trachea(100%)
kidney_proximal_convoluted_tubule_epithelial_cell	kidney		4460	Kidney(100%)
epithelial_cell_of_proximal_tubule	kidney		3053	Kidney(100%)
kidney_loop_of_Henle_thick_ascending_limb_epithelial_cell	kidney		1554	Kidney(100%)
fenestrated_cell	kidney		1027	Kidney(100%)
kidney_collecting_duct_principal_cell	kidney		789	Kidney(100%)
kidney_distal_convoluted_tubule_epithelial_cell	kidney		744	Kidney(100%)
podocyte	kidney		496	Kidney(100%)
brush_cell	kidney		414	Kidney(100%)
kidney_cortex_artery_cell	kidney		381	Kidney(100%)
kidney_mesangial_cell	kidney		261	Kidney(100%)
kidney_loop_of_Henle_ascending_limb_epithelial_cell	kidney		201	Kidney(100%)
kidney_capillary_endothelial_cell	kidney		161	Kidney(100%)
kidney_proximal_straight_tubule_epithelial_cell	kidney		95	Kidney(100%)
kidney_collecting_duct_epithelial_cell	kidney		25	Kidney(100%)
kidney_cell	kidney		3	Kidney(100%)
vein_endothelial_cell	lung		320	Lung(100%)
pulmonary_interstitial_fibroblast	lung		222	Lung(100%)
bronchial_smooth_muscle_cell	lung		2339	Lung(100%)
pericyte_cell	lung		61	Lung(100%)
ciliated_columnar_cell_of_tracheobronchial_tree	lung		57	Lung(100%)
dendritic_cell	lung		45	Lung(100%)
endothelial_cell_of_lymphatic_vessel	lung		41	Lung(100%)
club_cell_of_bronchiole	lung		15	Lung(100%)
lung_neuroendocrine_cell	lung		4	Lung(100%)
type_II_pneumocyte	lung		125	Lung(100%)
smooth_muscle_cell_of_the_pulmonary_artery	lung		98	Lung(100%)
adventitial_cell	lung		526	Lung(100%)
fibroblast_of_lung	lung		1523	Lung(100%)
endothelial_cell_of_hepatic_sinusoid	liver		675	Liver(100%)
hepatic_stellate_cell	liver		39	Liver(100%)
duct_epithelial_cell	liver		2	Liver(100%)
hepatocyte	liver		2929	Liver(100%)
Kupffer_cell	liver		2546	Liver(100%)
large_intestine_goblet_cell	intestine		158	Large_Intestine(100%)
epithelial_cell_of_large_intestine	intestine		229	Large_Intestine(100%)
intestinal_crypt_stem_cell	intestine		339	Large_Intestine(100%)
enterocyte_of_epithelium_of_large_intestine	intestine		1125	Large_Intestine(100%)

## Sheet: ST5 TS FACS info
id	category	code	n_cell	tissue_prop
plasma_cell	blood		804	Bone_Marrow(42%),Spleen(23%),Bladder(11%),Lymph_Node(11%),Thymus(3%),Trachea(2%),Mammary(1%),Lung(1%),Vasculature(1%)
hematopoietic_stem_cell	blood	Hematopoietic stem	187	Bone_Marrow(97%),Blood(2%)
erythroid_progenitor	blood	Erythroid progenitor	84	Bone_Marrow(100%)
erythrocyte	blood		67	Blood(80%),Spleen(5%),Muscle(2%),Thymus(2%),Liver(2%),Lymph_Node(2%),Bone_Marrow(1%)
platelet	blood		34	Blood(67%),Spleen(32%)
erythroid_lineage_cell	blood		2	Eye(100%)
nampt_neutrophil	immune		70	Bone_Marrow(78%),Blood(21%)
plasmablast	immune		4	Bone_Marrow(100%)
granulocyte	immune		72	Bone_Marrow(100%)
immune_cell	immune		493	Tongue(100%)
t_cell	immune		728	Mammary(23%),Eye(15%),Fat(15%),Lymph_Node(12%),Salivary_Gland(10%),Muscle(7%),Uterus(4%),Skin(4%),Vasculature(2%),Pancreas(1%)
cd4-positive_alpha-beta_t_cell	immune	CD4+ $\alpha$-$\beta$ T	1286	Blood(38%),Bone_Marrow(26%),Salivary_Gland(13%),Muscle(11%),Lymph_Node(9%),Lung(1%)
cd4-positive_alpha-beta_memory_t_cell	immune		400	Lymph_Node(48%),Spleen(27%),Blood(22%),Skin(2%)
cd8-positive_alpha-beta_t_cell	immune	CD8+ $\alpha$-$\beta$ T	1242	Muscle(39%),Bone_Marrow(24%),Prostate(9%),Blood(7%),Salivary_Gland(7%),Kidney(4%),Lymph_Node(4%),Lung(2%)
cd8-positive_alpha-beta_memory_t_cell	immune		491	Spleen(68%),Lymph_Node(23%),Skin(7%)
cd4-positive_helper_t_cell	immune		159	Salivary_Gland(75%),Kidney(20%),Thymus(4%)
cd4-positive_helper_t_cells	immune		3	Skin(100%)
cd8-positive_alpha-beta_cytotoxic_t_cell	immune		2	Skin(100%)
cd8-positive_alpha-beta_cytokine_secreting_effector_t_cell	immune		16	Blood(100%)
cd141-positive_myeloid_dendritic_cell	immune		16	Skin(37%),Lymph_Node(37%),Spleen(25%)
naive_thymus-derived_cd4-positive_alpha-beta_t_cell	immune		344	Lymph_Node(67%),Spleen(29%),Blood(2%)
naive_thymus-derived_cd8-positive_alpha-beta_t_cell	immune		43	Spleen(86%),Skin(13%)
regulatory_t_cell	immune	Regulatory T	66	Spleen(77%),Lymph_Node(19%),Skin(3%)
type_i_nk_t_cell	immune		79	Spleen(73%),Blood(24%),Lymph_Node(2%)
mature_nk_t_cell	immune		154	Muscle(60%),Spleen(39%)
nk_cell	immune		618	Bone_Marrow(33%),Fat(16%),Blood(12%),Spleen(10%),Lymph_Node(8%),Kidney(5%),Skin(3%),Vasculature(3%),Liver(2%),Mammary(1%)
nkt_cell	immune		24	Prostate(83%),Skin(16%)
b_cell	immune		734	Lymph_Node(60%),Pancreas(11%),Kidney(9%),Salivary_Gland(7%),Eye(3%),Fat(2%),Bladder(2%),Mammary(1%)
memory_b_cell	immune		1108	Spleen(48%),Lymph_Node(36%),Salivary_Gland(5%),Blood(5%),Bone_Marrow(1%),Thymus(1%)
naive_b_cell	immune		270	Blood(58%),Spleen(20%),Bone_Marrow(16%),Lymph_Node(4%)
cd24_neutrophil	immune		225	Bone_Marrow(99%)
monocyte	immune		910	Blood(58%),Bone_Marrow(34%),Prostate(3%),Thymus(2%)
classical_monocyte	immune		638	Spleen(51%),Blood(33%),Lung(14%)
non-classical_monocyte	immune		9	Lung(66%),Lymph_Node(33%)
intermediate_monocyte	immune		13	Lymph_Node(53%),Spleen(46%)
innate_lymphoid_cell	immune		514	Lymph_Node(99%)
neutrophil	immune		395	Spleen(31%),Liver(18%),Blood(15%),Bone_Marrow(14%),Lung(9%),Trachea(7%),Large_Intestine(1%),Small_Intestine(1%)
leucocyte	immune		145	Fat(100%)
cd1c-positive_myeloid_dendritic_cell	immune		43	Skin(79%),Lymph_Node(13%),Spleen(6%)
myeloid_cell	immune		58	Pancreas(100%)
myeloid_progenitor	immune		33	Bone_Marrow(100%)
plasmacytoid_dendritic_cell	immune		6	Spleen(66%),Bladder(16%),Lung(16%)
mature_conventional_dendritic_cell	immune		1	Lymph_Node(100%)
immature_natural_killer_cell	immune		2	Thymus(100%)
skeletal_muscle_satellite_stem_cell	muscle / skin		604	Muscle(100%)
capillary_endothelial_cell	muscle / skin		673	Muscle(61%),Thymus(20%),Lung(18%)
endothelial_cell	muscle / skin		595	Vasculature(45%),Skin(21%),Fat(13%),Trachea(5%),Spleen(4%),Pancreas(4%),Uterus(3%),Lymph_Node(1%)
epithelial_cell	muscle / skin		418	Prostate(89%),Skin(10%)
adventitial_cell	muscle / skin		418	Lung(71%),Salivary_Gland(28%)
mast_cell	muscle / skin		411	Skin(45%),Bladder(25%),Pancreas(12%),Muscle(6%),Lymph_Node(3%),Vasculature(2%),Trachea(1%)
pericyte_cell	muscle / skin		402	Muscle(70%),Bladder(12%),Vasculature(6%),Tongue(5%),Lung(4%)
slow_muscle_cell	muscle / skin		51	Muscle(100%)
tendon_cell	muscle / skin		55	Muscle(100%)
macrophage	muscle / skin		1584	Muscle(31%),Vasculature(15%),Bladder(14%),Skin(11%),Lung(7%),Fat(5%),Liver(4%),Heart(1%),Spleen(1%),Uterus(1%),Thymus(1%)
mesenchymal_stem_cell	muscle / skin		1421	Muscle(100%)
bladder_urothelial_cell	muscle / skin		227	Bladder(100%)
fibroblast_of_breast	muscle / skin		103	Mammary(100%)
basal_cell_of_prostate_epithelium	muscle / skin		55	Prostate(100%)
ciliated_cell	muscle / skin		55	Trachea(100%)
epithelial_cell_of_uterus	muscle / skin		49	Uterus(100%)
secretory_cell	muscle / skin		29	Trachea(100%)
endothelial_cell_of_lymphatic_vessel	muscle / skin		105	Muscle(61%),Bladder(20%),Lung(10%),Uterus(2%),Mammary(1%)
fast_muscle_cell	muscle / skin		84	Muscle(76%),Thymus(23%)
luminal_epithelial_cell_of_mammary_gland	muscle / skin		218	Mammary(100%)
vein_endothelial_cell	muscle / skin		207	Thymus(45%),Bladder(30%),Lung(14%),Mammary(4%),Tongue(4%)
kidney_epithelial_cell	muscle / skin		168	Kidney(100%)
vascular_associated_smooth_muscle_cell	muscle / skin		157	Thymus(92%),Lung(5%),Mammary(1%)
stromal_cell	muscle / skin		99	Skin(70%),Prostate(29%)
smooth_muscle_cell	muscle / skin		97	Vasculature(32%),Heart(31%),Muscle(15%),Trachea(13%),Bladder(6%)
melanocyte	muscle / skin		20	Skin(95%),Eye(5%)
mucus_secreting_cell	muscle / skin		14	Trachea(100%)
tracheal_goblet_cell	muscle / skin		12	Trachea(100%)
keratinocyte	muscle / skin		14	Tongue(100%)
fibroblast	muscle / skin		1106	Bladder(27%),Vasculature(18%),Uterus(13%),Salivary_Gland(11%),Trachea(9%),Thymus(8%),Fat(6%),Tongue(2%)
basal_cell	muscle / skin		1055	Tongue(74%),Lung(12%),Trachea(12%)
endothelial_cell_of_vascular_tree	muscle / skin		734	Muscle(100%)
muscle_cell	muscle / skin		35	Skin(100%)
ionocyte	muscle / skin		1	Trachea(100%)
tongue_muscle_cell	muscle / skin		4	Tongue(100%)
myofibroblast_cell	muscle / skin		33	Bladder(87%),Fat(12%)
medullary_thymic_epithelial_cell	muscle / skin		3	Thymus(100%)
mesothelial_cell	muscle / skin		3	Muscle(33%),Thymus(33%),Lung(33%)
serous_cell_of_epithelium_of_trachea	muscle / skin		6	Trachea(100%)
langerhans_cell	muscle / skin		5	Skin(100%)
ciliated_epithelial_cell	muscle / skin		2	Uterus(100%)
liver_dendritic_cell	liver		2	Liver(100%)
intrahepatic_cholangiocyte	liver		4	Liver(100%)
endothelial_cell_of_hepatic_sinusoid	liver		11	Liver(100%)
hepatocyte	heart		56	Heart(87%),Liver(12%)
cardiac_endothelial_cell	heart	Cardiac endothelial	108	Heart(100%)
fibroblast_of_cardiac_tissue	heart		49	Heart(100%)
cardiac_muscle_cell	heart	Cardiac muscle	14	Heart(100%)
lacrimal_gland_functional_unit_cell	eye		108	Eye(100%)
microglial_cell	eye		46	Eye(100%)
radial_glial_cell	eye		1	Eye(100%)
retinal_blood_vessel_endothelial_cell	eye		1	Eye(100%)
retinal_bipolar_neuron	eye		1	Eye(100%)
eye_photoreceptor_cell	eye		8	Eye(100%)
conjunctival_epithelial_cell	eye		16	Eye(100%)
corneal_keratocyte	eye		10	Eye(100%)
limbal_stromal_cell	eye		3	Eye(100%)
retinal_pigment_epithelial_cell	eye		3	Eye(100%)
muller_cell	eye		6	Eye(100%)
pancreatic_alpha_cell	pancreas		25	Pancreas(100%)
pancreatic_ductal_cell	pancreas		113	Pancreas(100%)
pancreatic_acinar_cell	pancreas		531	Pancreas(100%)
pancreatic_pp_cell	pancreas	pancreatic PP	68	Pancreas(100%)
pancreatic_beta_cell	pancreas	pancreatic beta	10	Pancreas(100%)
pancreatic_stellate_cell	pancreas		7	Pancreas(100%)
serous_cell_of_epithelium_of_bronchus	lung		2	Lung(100%)
basophil	lung		9	Lung(100%)
type_i_pneumocyte	lung		7	Lung(100%)
club_cell	lung		15	Lung(100%)
bronchial_smooth_muscle_cell	lung		14	Lung(100%)
respiratory_goblet_cell	lung		33	Lung(100%)
capillary_aerocyte	lung		38	Lung(100%)
lung_ciliated_cell	lung		35	Lung(100%)
alveolar_fibroblast	lung		88	Lung(100%)
endothelial_cell_of_artery	lung		41	Lung(63%),Mammary(21%),Muscle(7%),Thymus(4%),Tongue(2%)
dendritic_cell	lung		68	Lung(55%),Eye(44%)
lung_microvascular_endothelial_cell	lung		5	Lung(100%)
type_ii_pneumocyte	lung		319	Lung(100%)
duodenum_glandular_cell	intestine		5	Small_Intestine(100%)
intestinal_enteroendocrine_cell	intestine		6	Small_Intestine(83%),Large_Intestine(16%)
transit_amplifying_cell_of_small_intestine	intestine		30	Small_Intestine(100%)
transit_amplifying_cell_of_large_intestine	intestine		4	Large_Intestine(100%)
paneth_cell_of_epithelium_of_small_intestine	intestine		33	Small_Intestine(100%)
immature_enterocyte	intestine		44	Small_Intestine(70%),Large_Intestine(29%)
goblet_cell	intestine		119	Large_Intestine(88%),Small_Intestine(10%)
intestinal_tuft_cell	intestine		21	Large_Intestine(100%)
intestinal_crypt_stem_cell	intestine		74	Small_Intestine(54%),Large_Intestine(45%)
mature_enterocyte	intestine		678	Small_Intestine(63%),Large_Intestine(36%)

## Sheet: ST6 MAGMA gene sets
TRAIT	GENESET
PASS_ADHD_Demontis2018	ST3GAL3,KDM4A,PTPRF,MED8,DUSP6,TIE1,MPL,SZT2,ELOVL1,CDC20,SEMA6D,HYI,SORCS3,CDH8,PIDD1,MANBA,PANO1,RPLP2,SLC25A22,MEF2C,SGOL1,SLC6A9,CUBN,FOXP2,PNPLA2,ZNF131,KIZ,FBXL17,PDDC1,ANTXR2,CCDC24,B4GALT2,RUNX1T1,COL19A1,BSN,C9orf64,FAM186B,MCRS1,RBFOX1,XRN2,ARTN,CD40,TALDO1,GPM6A,DAGLA,ZNF521,SIRPB1,USP4,KCNH3,AURKA,CEND1,HYAL3,NAT6,RMI1,CCDC71,POLR3C,KCNJ13,OR8H1,ATP6V0B,SLC9B1,SPAG16,CD160,IFRD2,GIGYF…
PASS_Alzheimers_Jansen2019	BCAM,CEACAM16,PVR,EXOC3L2,MS4A6A,CLU,CBLC,MS4A2,PICALM,CLPTM1,SLC24A4,BIN1,PVRIG,STAG3,NKPD1,GATS,MS4A4E,CNN2,BLOC1S3,ZASP,APOC4,TRAPPC6A,MS4A4A,PPP1R37,FBXO24,BCL3,APOC2,IGSF23,BCKDK,ZNF232,LRCH4,ZCWPW1,ABCA7,RELB,MS4A6E,MS4A3,PVRL2,CD33,FAM63B,SAP25,KAT8,B4GALT3,PPOX,ADAM10,VKORC1,APOA2,PRSS53,CR1,EPHA1,ACE,FCER1G,GPC2,UFC1,ZNF646,ZNF668,ADAMTS4,TOMM40L,MBLAC1,ZFP3,CEACAM19,CTF1,PRSS8,APOE,APOC…
PASS_AtrialFibrillation_Nielsen2018	KCNN3,DCST1,CAV2,WIPF1,KIF20A,NME5,RAB1A,SCN10A,SH3PXD2A,BRD8,GMCL1,ADAM15,MYOG,ESR2,CDC23,ANXA4,NR3C1,PHLDB2,SLC35F1,PKD2L2,ENPEP,FAM13B,DCST2,CEP68,CAV1,UST,REEP2,NACA,NEURL1,PPFIA4,CPEB4,KDM3B,CASQ2,SPATS2L,PRIM1,GBF1,PLEKHA3,CAMK2G,MYH6,IL6R,TBX5,NAV2,CFL2,CCT2,C2orf47,REEP3,PCM1,RNF144B,HCN4,FGL1,CDC25C,ASAH1,ZPBP2,GFRA3,MXD1,JMJD1C,PTGES3,FKBP7,KCNH2,GJB7,PITX3,KCND3,CEP85L,KCNN2,ATP5B,FANC…
PASS_BIP_Stahl2019	TRANK1,RHEBL1,HAPLN4,ITIH4,CACNA1C,RPS6KA2,IL21,HLF,FAM196B,MYRF,ITIH3,GNL3,TMEM110-MUSTN1,TMEM110,KCNS1,CILP2,NEK4,DHH,GLT8D1,SEC11A,KCNG1,SPCS1,MUSTN1,NCAN,DOCK2,ILF3,ITIH1,ADD3,WFDC5,PBRM1,SSBP2,PACS1,TMEM258,PLEKHO1,FEN1,ZSCAN2,VPS45,C15orf53,FADS2,YJEFN3,SLC44A2,FADS1,UTP18,MAP1LC3A,SFMBT1,TM6SF2,MAPK1,LETM2,RCOR2,STARD9,MBTD1,MARK2,TERF2,WFDC12,DDN,ATP13A1,PRKAG1,GMIP,KMT2D,TLR9,CSF3,CNNM4,…
PASS_CD_deLange2017	SAG,P4HA2,TNFSF15,JAK2,CCL2,C1orf141,SNX20,NOD2,PTPN2,RPL37,CSF2,CCDC116,SDCCAG3,SBNO2,GPSM1,ZNF300,DAG1,PMPCA,RPL3,C21orf33,SLC22A5,RNF123,NKD1,SEC16A,NKX2-3,STMN3,BRD7,FGFR1OP,CREM,SP140,IL23R,RHOA,INPP5E,ZNF365,BSN,YDJC,RNASET2,USP4,CCL7,APEH,RTEL1,ZGPAT,ZPBP2,LOC101929747,LOC101928947,IRGM,IKZF3,CLN3,LNPEP,STAT3,C9orf163,C11orf30,PUS10,ORMDL3,PDLIM4,IRF1,AMIGO3,ADCY7,IP6K1,ERAP2,NUPR1,TUFM,IN…
PASS_Celiac	LPP,KIAA1109,RGS1,CCR1,ETS1,SH2B3,PUS10,IL18RAP,IL2,ADAD1,TAGAP,IL12A,ACTRT3,IRF4,REL,IL1RL1,SLC9A4,XCR1,IL18R1,MYNN,MMEL1,TTC34,ATXN2,UBE2L3,LRRC34,HECA,KIAA1841,TIMMDC1,BRAP,ZFP36L1,FAM213B,LRRIQ4,NFIA,ICOS,PEA15,LRRC2,USP34,ELOVL3,CX3CR1,PTPN2,PPRC1,ARHGAP31,ANP32B,SCHIP1,C2orf74,CD247,FYCO1,CMTM7,PTPN11,RABEP1,PDLIM2,XPO1,DCAF8,PITX3,LRRC31,STAT4,HERC4,LTF,GBF1,IFI16,PEX13,RBL1,CIITA,THEMIS,Z…
PASS_Coronary_Artery_Disease	CDKN2A,CDKN2B,PSRC1,CELSR2,WDR12,PHACTR1,ZPR1,MORF4L1,ICA1L,ADAMTS7,LIPA,LPL,PTPN11,CUX2,APOA5,RAI1,LDLR,C10orf32,SLC22A3,HNF1A,SMG6,ALDH2,CCDC97,MYL2,SREBF1,MRAS,COL4A1,UBE2Z,TOM1L2,LRRC48,C12orf43,CYP17A1,NDUFA12,OASL,SNF8,RPL13,SPG7,GIP,HORMAD1,HNRNPUL1,ATXN2,GOLPH3L,ATPAF2,TAF1A,TMEM170A,GID4,ST3GAL4,NME9,CTSS,PLEKHA7,BMP1,CCDC63,E2F7,KCNK5,QTRT1,TRAFD1,CHKA,SH2B3,SNRPC,CYP46A1,FAM109A,IPO9,L…
PASS_DrinksPerWeek_Liu2019	CADM2,WNT3,RFC1,RASIP1,SIX3,KLB,NSF,MTCH2,FNBP4,NUP160,PSMC3,ADH1C,FUT1,IZUMO1,CD19,NFATC2IP,DRD2,SPI1,FGF21,EHBP1,OTX1,ACTR10,GCKR,FNDC4,IFT172,AUTS2,LAT,AGBL2,ARID4A,MRPL33,INPP4B,SLC39A13,CLDN25,RPTOR,SLC5A6,SLC4A8,ATRAID,ADH1B,WDR19,RABEP2,NTN5,SULT1A1,PSMA3,EPHX1,NR5A1,DOC2A,ANKRD13B,ST8SIA3,OLIG1,OMG,CSTF3,CCDC33,EVI2A,ATP2A1,KDM6B,NF1,A3GALT2,RBKS,C17orf78,EVI2B,CAD,ANKK1,LIAS,PIK3R3,FAM13…
PASS_FastingGlucose_Manning	SPC25,YKT6,MYL7,G6PC2,GCKR,MRPL33,FADS1,C2orf16,GTF3C2,FEN1,GCK,MTNR1B,ABCB11,CRY2,SLC2A2,ZNF513,PPM1G,FADS2,TMEM258,IFT172,MYBPC3,MADD,ACP2,NR1H3,FNDC4,NRBP1,MYRF,SLC35C1,SNX17,MPV17,MAPK8IP1,RBKS,DDB2,CAMK2B,CERS6,PTPMT1,UCN,TRIM54,DGKB,NOSTRIN,ADCY5,ARAP1,EIF2B4,FOXA2,RPL22L1,SLC5A6,POLD2,BRE,CAD,ATRAID,DPYSL5,DNAJC5G,KBTBD4,NDUFS3,FAM180B,RGS17,SLC30A3,PSMC3,SPI1,SNRPD2,CDKAL1,KRTCAP3,ZNF512,…
PASS_GeneralRiskTolerance_KarlssonLinner2019	CADM2,FOXP2,SOX2,SDCCAG8,ZBTB10,AKT3,TET2,CEP170,CENPV,GABRA2,FAM184A,TMEM214,TBC1D5,XKR6,BHLHE22,FRAT1,STK32C,PIGL,KHK,SND1,NPAS4,PPP1R13B,SOX7,PHC2,EMILIN1,AGBL5,DENND1A,PINX1,OST4,ZNF536,EPHA5,SLC4A10,ZFYVE21,C5orf64,FOXN3,TBKBP1,RP1L1,FURIN,DEK,ARHGAP19,MTMR9,RGS17,CGREF1,ATRNL1,FRAT2,A3GALT2,PDGFC,BCL2L12,CACNA1C,ATXN1L,RTN4RL2,ERICH2,TAC1,FES,PCCB,FOXP1,PPP3R1,ZNF821,MFHAS1,CAPN3,TTC19,TCF4…
PASS_IBD_deLange2017	REL,ZGPAT,SNAPC4,CYLD,PUS10,FGFR1OP,INPP5E,TNFSF15,C1orf106,PMPCA,UBE2L3,ZNF365,SLC22A5,JAK2,INSL6,IKZF3,C21orf33,KIF21B,STMN3,ARFRP1,LOC101928947,DAG1,RNF186,RNF123,C1orf141,GSDMB,P4HA2,USP4,SDCCAG3,SAG,RPL3,SEC16A,IL27,GPSM1,C11orf30,AMIGO3,CCDC116,YDJC,OTUD3,PTPN2,IP6K1,NOTCH1,ATXN2L,RHOA,UBA7,IL12B,LRRC3C,CSF2,CAMKV,PSMG1,ZPBP2,SLC2A4RG,LIME1,NUPR1,STAT5B,PEX13,LAMB1,RTEL1,SLC26A6,GSDMA,GRB7,…
PASS_Insomnia_Jansen2019	PLCD3,LIN28B,NMT1,HEXIM2,DNPH1,CNIH2,CUL9,TMEM151A,TCF4,RAB1B,FOXP2,KLC2,MEIS1,MFSD1,DAB1,RARRES1,NADK,TRPC7,CALML6,KDM4B,TP53INP1,SMAD5,LOC100287290,ACBD4,DIS3L,DCAKD,NFE2L1,KLHDC8B,GOLGA2,CCDC71,INHA,STAU1,RFPL4A,CDH13,PTPRD,SPI1,SDK1,TMEM52,UBE2W,YIF1A,COPZ2,GFM1,LRFN5,TMEM161B,IPO9,ZNF521,PAM,CHCHD3,GNB1,ST8SIA6,SNX11,SWI5,HEXIM1,GIN1,SLC35E2,NLRP9,LXN,LMOD1,PPIP5K2,CCDC106,PTGER3,ZNF585A,C3o…
PASS_Intelligence_SavageJansen2018	AUTS2,DCC,RBFOX1,NEGR1,IL27,CCDC101,DAG1,DDN,SULT1A2,CD19,CLN3,RABEP2,RNF123,APOBR,ATXN2L,ATP2A1,MGAT3,CSE1L,TRAIP,DPP4,ZNF638,RHOA,NUPR1,NKIRAS1,MGEA5,SEMA3F,GBF1,EXOC4,LONRF2,AKTIP,TET2,CAMKV,CALN1,MON1A,RUNX1T1,LCORL,MTMR4,AMIGO3,GMPPB,MST1R,C17orf47,RBM6,FOXO6,APEH,CHST10,MST1,MYBPHL,NFATC2IP,GATB,SMIM4,NT5DC2,PPM1E,UBE2E1,TRIM37,CDHR4,THRB,BAG5,SND1,NCAPG,SEPT4,MEF2C,AMT,TAB1,HBEGF,TUFM,PFDN…
PASS_Lupus	IRF5,ITGAX,TNPO3,NAB1,TNIP1,YDJC,CCDC116,SCT,UBE2L3,CDHR5,STAT1,IRF7,PHRF1,BLK,ITGAM,STAT4,RASSF7,LMNTD2,BANK1,SMG7,DRD4,RAVER1,TNFAIP3,WDFY4,PXK,LRRC56,HRAS,NCF2,ZGLP1,IKZF3,FCGR2A,CLEC16A,LOC101059906,PDHB,ICAM3,GLS,UHRF1BP1,DEAF1,ICAM1,XKR6,ZPBP2,ICAM5,CD44,SNRPC,LAMC2,HSPA6,SPRED2,GRB2,ICAM4,FDX1L,LOC101060024,SLC15A4,ANKS1A,GRB7,ST8SIA4,IRF3,ARID5B,TCP11,ABHD6,SLU7,PTDSS2,C6orf106,GSDMB,TMEM…
PASS_MDD_Howard2019	TCF4,SORCS3,BAG5,RBFOX1,TMEM106B,ERBB4,LRFN5,DRD2,GRM5,B3GALTL,SGIP1,NCOA5,TENM2,NRD1,RAB27B,NEGR1,CTNNA3,XRCC3,YLPM1,APOPT1,PCLO,SHISA9,KLC1,NRG1,ZNF35,C3orf84,TCTEX1D1,METTL9,MARK3,BSN,KLHDC8B,RBM4B,TAOK3,SGCZ,PRR34,ADCK3,DLST,CD40,CDHR4,LOC101928592,GRM8,ZNF197,ASTN2,ZNF660,RFWD2,DCC,LRP1B,RHOBTB1,PROX2,SPTBN2,CCDC36,ANKK1,CCDC71,RBM14,AREL1,ZKSCAN7,TYR,CDH13,RBM14-RBM4,CNTNAP5,ZCCHC7,CC2D2A,P…
PASS_Multiple_sclerosis	CLEC16A,MMEL1,AHI1,GFI1,SLC30A7,TAGAP,IL2RA,DPH5,EVI5,EXTL2,FAM213B,DKKL1,CD58,CXCR5,TTC34,CD86,TNFRSF1A,CYP24A1,TMEM39A,CDK4,PLEKHG6,POGLUT1,IQCB1,PDE4A,TEAD2,CD37,AGAP2,LMAN2,GPR65,MPV17L2,RAB3A,TNFRSF14,JUND,ZFP36L1,FAM69A,TNFSF14,RPS6KB1,FCRL3,PRM2,KEAP1,RGS14,SP140,S1PR5,NCF4,PRM1,RBM17,MAST3,SCNN1A,PRDX5,RGS1,BATF,GALC,TUBD1,RPL5,IL12A,ACTRT3,SLC6A16,KIF5A,CTDSP2,ARHGAP31,C1orf106,STAT3,OS9…
PASS_Primary_biliary_cirrhosis	IRF5,EXOC3L4,IL12A,IL12RB2,DDX6,TNPO3,NAB1,SOCS1,CLEC16A,SCHIP1,STAT4,ZPBP2,TNP2,TMEM39A,GSDMB,MANBA,RPL3,NFKB1,SPIB,SCNN1A,POGLUT1,RPS6KA4,CCDC88B,IQCJ-SCHIP1,ARHGAP31,ARL14,POLD1,IKZF3,PRM2,ORMDL3,TNFRSF1A,SERBP1,CAPSL,PRM3,IL7R,LOC101928947,STARD3,LTBR,SMC4,CTSH,RAVER1,MYBPC2,MED1,FBXL20,LBH,TRIM59,ICAM3,LRRC3C,IFT80,YIPF2,TCAP,C19orf52,SLC9B1,PLCL2,CARM1,PLCB3,CDK12,PPP1R1B,BAD,LOC101929578,I…
PASS_ReactionTime_Davies2018	SPATS2L,PRKAG1,FOXO3,ATXN2,APC,SH2B3,HARBI1,RHEBL1,ALDH2,DDN,ACAD10,ZBTB7A,ATG13,BRAP,REEP5,SRP19,DHH,PFDN1,AMBRA1,ARHGAP1,DGKZ,KMT2D,HNRNPK,RMI1,PCDH17,METAP1D,C9orf64,FOXP1,FAM228B,MAPKAPK5,F2,CKAP5,OLA1,PACSIN3,TNIK,FERMT3,ZNF638,SMG7,NAA25,CSE1L,C11orf49,LRP4,CCDC85A,SCRN3,SAMD3,ARFGAP2,TMEM116,NMNAT2,DPP4,MCTP1,PTPN11,CUX2,UBE2E2,STIP1,MDK,DCC,EFNA5,KIAA1328,DYNC1I2,CHRM4,CYSTM1,CD47,CIR1,GN…
PASS_Rheumatoid_Arthritis	AP4B1,OLFML3,PHTF1,PTPN22,BCL2L15,DCLRE1B,HIPK1,RSBN1,MAGI3,C5orf30,IRF5,DDX6,IL2RA,CD40,TRAF6,CTLA4,FAM213B,SPRED2,MMEL1,FAM205A,ANKRD55,PTPN2,TNFAIP3,TNPO3,ARID5B,CCR6,COG6,RAG1,NAB1,RAVER1,STAT4,CD28,REL,PHF19,FCGR2A,YRDC,RASGRP1,TTC34,GATA3,PRKCQ,PLCL2,ZNF594,NCOA5,TEC,ICAM3,CCL21,SYT6,CD247,ZPBP2,HAPLN4,TM6SF2,TSPAN14,TRAF1,ZGLP1,GSDMB,TNFSF9,KLF2,FOXI3,GPR137,CILP2,RPL3,SLC10A4,BOLL,ATP13A2…
PASS_SWB	CSE1L,PTPRD,RBFOX1,ARFGEF2,CSMD1,ZNFX1,CDH13,NKAIN2,FHIT,LOC101927998,CACNA2D1,DDX27,AUTS2,CCDC68,SGCZ,OPCML,NPAS3,PRKG1,RAB27B,SPG7,FNBP4,NUP160,ADTRP,EIF4G2,SLC26A5,ZBED5,FOCAD,MTCH2,RBFOX3,WBSCR17,AGBL2,FTO,STK4,TENM4,OTOGL,MACROD2,TENM2,B3GALT1,FNIP1,BAIAP2,ACVR1B,MEIKIN,RPL13,SPATA13,PTPRN2,ASXL3,KIFC3,MDH1,SETD1B,RAPGEF6,SEMA6D,WWOX,CTNNA2,LOC388282,ARL14EP,PITPNC1,SLC35F3,UHRF1BP1,ZNF385D,…
PASS_Schizophrenia_Pardinas2018	C10orf32,NRGN,DPYD,C2orf47,CACNA1I,RBFOX1,PPP1R16B,ESAM,NGEF,SPATS2L,PPP1R13B,SF3B1,VSIG2,CDK2AP1,HSPD1,CACNA1C,C12orf65,ZFYVE21,PITPNM2,VRK2,MPHOSPH9,AS3MT,SNAP91,FOXP1,CACNB2,SDCCAG8,ACTR5,TYW5,TSSK6,CYP2D6,CHRM4,TAOK2,BAG5,CYP17A1,TSNARE1,CENPM,INO80E,ATG13,SFMBT1,GIGYF2,ITIH4,SETD8,OGFOD2,SLC32A1,RFTN2,DOC2A,RAD9B,FXR1,MDK,TMEM110-MUSTN1,TMEM110,C2orf82,NDUFA6,ZSWIM6,PCCB,C2orf69,ATP2A2,DGKZ,…
PASS_SleepDuration_Dashti2019	SGCZ,FOXP2,TCF4,GNAO1,PAM,FTO,SLC6A3,RBFOX1,DRD2,STAG1,PPP2R3A,VRK2,MSL2,PPIP5K2,GIN1,PSD4,PDE4B,PCCB,MSRA,PAX8,ARRDC1,MVK,MYT1L,OLFM2,PIN1,CASC10,ZCCHC7,HSD17B12,MLLT10,NOVA1,EFCAB13,XKR6,SKIDA1,CRHR1,UBE3B,KPNB1,HTR4,UBL5,FADS1,PRKG1,COG5,SCN1A,CTC1,NSF,FEN1,WNT3,CHCHD3,KCTD10,NTM,ANKK1,DPH7,MFHAS1,ZMYND19,IPO9,FADS2,KCNMB2,FANCL,DAB1,ARHGAP27,MAX,TRPC7,TMEM258,MRPL41,C5orf30,SMAD5,DEFB135,LMAN…
PASS_Type_1_Diabetes	BCL2L15,SUOX,PTPN22,RAB5B,OLFML3,CDK2,PTPN11,PMEL,ERBB3,AP4B1,CLEC16A,SH2B3,PHTF1,IL2RA,PA2G4,RSBN1,BRAP,DCLRE1B,CTLA4,HECTD4,TRAFD1,NAA25,IGF2,INS-IGF2,CCDC101,MAGI3,RPS26,IKZF4,SULT1A2,ATXN2,HNMT,ALDH2,ACAD10,HIPK1,MAPKAPK5,TMEM116,INS,IFIH1,PTPN2,SLC1A5,SULT1A1,CAPSL,SOCS1,BACH2,GCA,ERP29,ADAD1,NUPR1,LMO7,FAP,CTCF,CD28,DUSP22,SIRPG,UBASH3A,CENPW,FUT2,CTRB1,NSL1,PGM1,EFR3B,MAMSTR,MYL2,NFATC1,AD…
PASS_Type_2_Diabetes	TCF7L2,KIF11,CDKAL1,HHEX,IGF2BP2,KCNQ1,WFS1,APOC1,FTO,JAZF1,IDE,ZMIZ1,SSR1,SLC9B2,RBMS1,TIMP4,ARL15,THADA,ZNF239,SLC9B1,PROX1,ARAP1,TSPAN8,MYBL2,KCNJ11,KLHL42,PLEKHA1,PRC1,GIP,CISD2,UBE2D3,RNF43,ZFAND6,CDKN2B,HSF5,PDHA2,HSD17B12,FAM133B,TAF5L,RCCD1,MTNR1B,CREB3L2,PTH1R,DENND1A,VPS33B,PPARG,UBE2Z,SNF8,FBXW7,ADAMTS3,NCR3LG1,SPPL3,SGK2,C2CD4A,URB2,SYN2,FGD5,MAP3K11,ANKS1A,FCHSD2,KCNK7,CTRB2,PCBD2,CR…
PASS_UC_deLange2017	OTUD3,IL23R,PLA2G2E,PUS10,NKX2-3,C1orf106,SNAPC4,TNFSF15,PSMG1,REL,LAMB1,CARD9,DNLZ,RHOA,SDCCAG3,IKZF3,APEH,GPR35,SLC26A3,RNF123,ZPBP2,FCGR2A,INSL6,NICN1,PMPCA,KIF21B,DLD,GSDMB,RTEL1,TCTA,STAT3,ARFRP1,CAMKV,C9orf163,TNFRSF14,DAG1,STMN3,INPP5E,AMT,JAK2,RNF186,MST1,GPX1,BSN,GMPPB,TRAIP,AMIGO3,C3orf62,RPL3,GSDMA,GPSM1,LOC101928947,SLC26A6,ZGPAT,TMEM89,GNA12,CACNA1S,USP4,GRB7,IP6K1,MON1A,NOTCH1,ORMDL…
PASS_VerbalNumericReasoning_Davies2018	RNF123,TRAIP,IP6K1,CSE1L,ATXN2L,CAMKV,NKIRAS1,NEGR1,RBM6,FOXO3,ARFGEF2,BSN,RHOA,DCC,PRKAG1,CCDC101,MGEA5,SULT1A2,RBM5,CLN3,MON1A,IL27,UBE2E1,MST1,SH2B1,TET2,CDHR4,RABEP2,AUTS2,MGAT3,MEF2C,TCTA,FOXO6,AKTIP,PFDN1,NICN1,GPX1,PEF1,SND1,EXOC4,AMT,APOBR,TUFM,GMPPB,RHEBL1,AMIGO3,UBA7,ATP2A1,HCRTR1,CD19,KMT2D,DAG1,STAB1,SMIM4,RBFOX1,FAM212A,RBL2,COL16A1,CYSTM1,MTMR4,GGNBP2,SEPT4,PIGW,FSCN3,NCAPG,LCORL,DD…
PASS_Worry_Nagel2018	CADM2,DLST,CRHR1,PROX2,RPS6KL1,AS3MT,C10orf32,ITIH4,SFMBT1,TMEM110-MUSTN1,TMEM110,MUSTN1,NT5C2,NSF,ITIH3,ARHGAP27,YLPM1,TLR9,TWF2,ZMYND10,ITIH1,RASSF1,STAB1,PAX6,CNNM2,CYP17A1,WDR82,PLEKHM1,PCCB,WNT3,FAM120AOS,ALAS1,PPM1M,AREL1,PBRM1,DRD2,STAG1,MYO1H,KCTD10,DTD1,RANGAP1,GNL3,GLT8D1,ACVR2A,MTCH2,NEK4,MVK,SLC39A13,PSMC3,SMIM4,NPRL2,ZNF646,ZCCHC14,NT5DC2,SEMA3B,WBP1L,SPCS1,RBFOX1,ZNF668,NCAM1,STX1B,…
UKB_460K.biochemistry_AlanineAminotransferase	CHUK,ZNF251,HKDC1,MEF2BNB-MEF2B,PCCB,APOE,CILP2,BAZ1B,DPM3,MPHOSPH9,LPAR2,LOC100505549,NYNRIN,TMEM147,MSL2,ABO,CYHR1,TMEM116,ZNF517,NDUFA13,TIMP4,TECTB,APOC1,CHEK2,BCL7B,RSG1,ZNF34,HAPLN4,BMF,TRIM46,EFNA1,SRP14,THBS3,ECM1,CEBPG,KRTCAP2,CD276,TRIB1,CIART,MLH1,TBL2,ATP4A,ARHGAP39,PPP2R3A,C4orf36,BRAP,SUPV3L1,SPATA21,NCAN,FSCN2,PBX4,LRRC24,PPP1R16A,MUC1,SLC50A1,MLXIPL,MFSD3,GMIP,TOMM40,MAPKAPK5,GPT,…
UKB_460K.biochemistry_AlkalinePhosphatase	NDUFA13,BRAP,HBP1,CILP2,NR3C2,AKR1C4,TOMM40,INPP5E,CYHR1,FOXRED1,CLEC10A,MLXIPL,JARID2,RAB3IL1,C9orf163,C10orf32,BCAM,ADAMTSL2,GPSM1,ATG16L1,FAM163B,TFPT,TLCD2,HAPLN4,S1PR2,XBP1,SLC5A6,TMBIM1,LZTFL1,TNFSF12,GABARAP,SCAP,IFITM3,SFXN2,RPUSD4,PABPC4,PLEKHA4,ACAP1,IFITM5,CAD,CELA3A,SHFM1,CUX2,C6orf229,TNFSF13,KAAG1,ZC2HC1C,RBL2,BCAT2,NCK1,SNX17,RAB4B,WDR81,SRPR,PLA2G6,ATHL1,TREH,TRIM6,MARC1,ARSG,TRIM…
UKB_460K.biochemistry_Cholesterol	MYO5B,NDUFA13,TOMM40,APOE,GSK3B,SPACA4,DYNC2LI1,QPCTL,FBXO46,PPM1G,ZNF23,CA11,TAGLN,HAPLN4,IST1,TBKBP1,DBP,GTF3C2,ZNF821,CBLC,CEACAM16,BRCA2,PPP1R37,MARC1,MEF2BNB-MEF2B,C19orf38,DOK7,HPR,S1PR5,RAB3IL1,ASAP3,SP4,NKPD1,FUT2,NYNRIN,SPTY2D1,CDKN2D,CCDC116,ZNF512,TRAFD1,IRF2BP2,SARS,CEACAM20,FGF21,C6orf106,SIDT2,N4BP2L1,DAGLB,RAF1,OMG,CELF1,HLX,CSNK1G3,GPAM,HGFAC,C12orf43,SLC44A2,OASL,BUD13,IGSF23,NTN…
UKB_460K.biochemistry_Glucose	GCK,SPC25,YKT6,ITFG3,RGS11,ZFP36L2,NCR3LG1,MYBPC3,GCKR,POLD2,FNDC4,RPL22L1,SNX17,MYL7,ZNF513,ADCY5,PPM1G,KCNQ1,NUDT5,GTF3C2,IFT172,ACP2,MADD,FAM46C,INS,NRBP1,SSR1,KCNJ11,GLIS3,GPSM1,NUCB2,FADS2,NOSTRIN,TCF7L2,FOXN3,SLC30A8,CDC123,NR1H3,DDB2,EIF2B4,PCSK1,HNF1B,CDKAL1,IGF2,AEBP1,INS-IGF2,RREB1,FADS1,INTS8,TMEM258,ABO,TH,RFX6,FEN1,C2orf16,SLC2A2,PDX1,FOXA2,EIF5A2,ACSL1,CAMK2B,RAPSN,PEAK1,FTO,DGKB,ST…
UKB_460K.biochemistry_HDLcholesterol	OR4C6,MYO5B,TNNC2,TAGLN,DPEP2,CDK2AP1,THRA,CEP164,LILRB5,TPM1,TMED5,F2,WFDC13,LOC101929578,MT1H,TNFSF13,FHOD1,MYPOP,C12orf65,STAB1,GFOD2,BAD,MARC1,FAM227A,FARP2,OR5D13,ORMDL3,MARCH2,SHMT2,CCND3,ESRRA,MMP9,MARCH8,ACD,RNF123,ENKD1,KDF1,NEUROD2,ZSWIM1,PARD6A,CES4A,SLC12A4,APOC3,RANBP10,MT1A,BAZ1B,C6orf1,SBNO1,BCL3,ABCB9,CSF3,PEX6,GPIHBP1,C16orf86,CERS2,TRADD,NUDC,GPN2,C18orf32,LILRA3,B3GNT9,IGHMBP2,…
UKB_460K.biochemistry_HbA1c	TMEM265,IER5L,THADA,ARHGEF15,DAG1,CDKAL1,C17orf99,TMPRSS6,FADS1,TRAF4,SYCE2,ZFP36L2,TMEM258,MED9,FADS2,HBA2,TEX33,HMG20A,TH,CLN3,PABPC4,LRRC47,C3orf84,BET1L,KCNQ1,KIF1BP,ADCY5,SP9,SAT2,PRM2,MFSD2B,NCR3LG1,LAMB2,FBXO46,INS,GCKR,SETD1A,TNFSF12-TNFSF13,OR10X1,GPR155,KCNJ11,SCGB1C1,SREBF1,CALR,SLC5A1,TMC8,SMC4,OR6K3,MPST,C12orf54,APOBR,USP19,ATHL1,C2orf44,TGFB1,MYBPC3,A4GALT,DPP8,GCDH,SLC25A47,YKT6,F…
UKB_460K.biochemistry_LDLdirect	PKD1L3,HNF1A,MARC1,MEF2BNB-MEF2B,CLPTM1,APOA5,DDX56,RFXANK,ZNF235,TBKBP1,BLOC1S3,SDCBP,HP,IST1,S1PR5,CDKN2D,PSMA5,LDLR,APOC2,TAT,FOXA3,DCPS,UBXN2B,NKPD1,CEACAM19,C12orf43,ZPR1,RASIP1,SNX17,CA11,IGSF23,HPR,NOP58,FBXO46,DOCK6,SP4,KRI1,USP24,GDF7,ZNF513,ZNF14,HAVCR1,MEF2B,ZNF821,C19orf38,HMGCR,CBLC,RELB,FNDC4,MRPL33,TRAFD1,SPACA4,RAB3IL1,NAA25,MAMSTR,MAPKAPK5,GFI1,TMEM50A,PLCG1,LPAR2,NCAN,QPCTL,KIAA…
UKB_460K.biochemistry_SHBG	DRG2,NDUFA4L2,ALOX15B,LOC101928499,USP3,FNDC4,KDM6B,COBLL1,YBX2,GUCY2D,USP43,TMEM95,LRRC24,EVI2B,CYB5D1,CHRNB1,GPN2,RCN3,C12orf43,RPL13A,DLG4,ZDHHC18,TRIP6,SERPINF2,MTFP1,HNRNPK,LHX3,GKAP1,GNGT2,TECPR1,MYPOP,JUND,KIF27,TMEM88,SLC30A3,AKR1C3,PHOSPHO1,NT5C,ZSCAN25,TRAIP,C4orf36,FEN1,SLC12A9,ZHX3,C9orf64,CCDC158,PAG1,FADS1,TOP1,QSOX2,TFEB,PGC,CYHR1,SHMT2,MYO9B,MPV17,SLC2A4,SUPT7L,GABARAP,CYP26A1,PCY…
UKB_460K.biochemistry_Testosterone_Male	KISS1,AKR1C4,TNK1,CD19,PCCB,ALOX15B,PHB,LAT,HNRNPK,NRBF2,DOK7,NAA38,UCN,EFNB3,GNGT2,TMEM88,TMEM95,NF1,PPM1G,CHD3,CRHR1,ATXN2L,GOLT1A,METAP1,B4GALNT2,GTF3C2,HSD17B13,ADH4,TECPR1,TNFSF12,FNDC4,WDR81,IL27,PLSCR3,CYB5D1,MPV17,PHOSPHO1,BAIAP2L1,RCN3,RABEP2,ZNF652,LOC101928499,MYPOP,GPN2,CRTAM,ABI3,ZDHHC18,C9orf64,IRF2BP1,THOP1,HGFAC,RMI1,KLHL8,SPNS1,SULT1A2,ATP2A1,BHLHA15,APOBR,ZNF512,CLN3,GPATCH3,KCT…
UKB_460K.biochemistry_TotalBilirubin	ERP29,CYP26C1,ACAD10,IAPP,MPST,DGAT2,KCTD17,NAA25,BRAP,EFHD1,PTPN11,MAMSTR,NRBF2,ZPR1,ATXN2,FUT2,APOA5,UGT1A5,MSL2,TTC19,ANGPTL3,MYRF,CYP26A1,MROH2A,MARC1,SPX,OR10X1,SH2B3,OR6Y1,RNFT1,SLC22A18,SMIM19,MOGAT2,SLC2A2,SLC20A2,FADS1,ALDH2,UGT1A9,RPS6KB1,OR10Z1,BUD13,RXRA,USP1,PLCG1,AKR1C4,ZSWIM7,FEN1,TUBD1,OR10R2,TMEM258,TRAFD1,ARNTL,ZHX3,STAG1,GPAM,AHR,SLCO1B1,UGT1A3,NAP1L4,UGT1A4,FAM109A,BCAS3,DGKD,…
UKB_460K.biochemistry_TotalProtein	FCGR3A,FCGR2C,ARHGAP27,ATXN1,H2AFX,CD68,RNFT1,TUBD1,BCL2L12,ZNF512,USP34,DPH1,WDR81,PCCB,KCTD6,WNT3,FAM83E,FLT3LG,DPAGT1,PSMC3,TNFSF12-TNFSF13,HIC1,HGFAC,DNAJC5G,TBC1D27,PTRH2,NYNRIN,SCAF1,MOK,SHBG,SYN2,DOK7,IRF3,ANKRD11,PPM1G,SOX18,FGF11,ADM,RPP14,QTRT1,PRMT1,TMEM57,TMEM102,HNRNPK,ZBTB7A,SPHK2,MPV17,WDR20,FNDC4,NTN5,SNX17,EFNB3,SENP3,IKZF3,VPS11,MPZ,RASIP1,C9orf64,TIMP4,FXR2,MAP2K2,SERINC4,HMBS,…
UKB_460K.biochemistry_Triglycerides	APOE,ZNF335,TM6SF2,NR1H3,INHBC,PCK1,PLCB3,SLC10A6,GAS6,CYP26C1,NTAN1,WDR82,PDXDC1,MPV17,HAVCR1,REEP3,MRPL33,MADD,SEMA3G,CTSA,BAD,HGFAC,TWF2,CYP26A1,GLYCTK,CEP68,RASIP1,HAPLN4,PLTP,PGS1,SDCBP,DNAJC5G,IFT172,PBX4,RAB3IL1,DNAJC30,NRBF2,WDR76,MYO1F,PCIF1,PPM1M,UCN,SLC4A1AP,TRIB1,TPM1,BCAM,MAFF,YJEFN3,TIMD4,LPAR2,SERINC4,APOC1,DNAH1,ACP2,APOA5,TCF23,BCL3,F2,SLC12A5,CENPA,PTPN13,LRP4,C5orf67,MARCH2,NCA…
UKB_460K.blood_EOSINOPHIL_COUNT	ARHGAP27,LPP,TNFRSF10B,RILPL2,FER1L5,APOC1,XPNPEP3,DOC2A,LAMB2,SNRNP200,SMPD3,GDPD3,RAD54L2,GOLPH3L,RAPGEFL1,ERBB3,MYRF,NLRC5,INPP5J,TRMT10C,OLIG1,SPECC1L,MTHFS,XRCC6,BTG1,EGR2,FBXO46,LMAN2,PATZ1,ZFPM1,GFI1B,TRAFD1,KLF2,EIF4ENIF1,MAPK3,MIIP,IFITM1,TEF,SETDB1,TLR6,ST20,RELA,ADAMTSL4,CYP8B1,IFITM2,CKM,PMPCA,SPRED2,HMGCL,SETD8,ALDH2,SDR9C7,IL18RAP,FEN1,SCNN1A,WBP4,LRRIQ4,MAPKAPK3,RGS14,SERPINB3,MPHO…
UKB_460K.blood_LYMPHOCYTE_COUNT	TMEM265,NPDC1,ZMYND15,GATA3,ITGA4,OR4C6,RNF167,PTPN1,RAVER1,RPS10,DEF6,ZGLP1,RHBDF2,ZNF771,CD244,CCR7,ABCG4,HIC2,TMEM116,PSD4,SCNN1A,PDLIM4,KCNN4,S1PR5,CTSK,MYL2,DDB2,C10orf54,KLHL29,NFKBIA,COPS4,SREBF1,NR1H3,RSBN1,SPHK1,EGR2,LOC101928947,OGFOD2,PLEKHG6,SMG9,F2,RAPSN,CCND3,IL13,ALS2CL,EXTL2,WDR78,SLC9B1,IRF4,PTGDS,LCNL1,DCAF16,PHF19,PUS10,PLCB1,ZFP3,ACP2,APOPT1,P2RY13,RAB24,CALR3,PTMA,BATF,CREB3,…
UKB_460K.blood_MEAN_CORPUSCULAR_HEMOGLOBIN	C19orf43,THRB,MEF2C,ZNF3,LOC101928093,TRIM8,ASPHD1,RHOF,FAXDC2,HBA2,SUMO3,SH3PXD2A,URB2,ZNF646,HBA1,ATP6V0D1,LOC101929578,KLB,HAUS1,PDCD5,COX6A1,NPAT,ZDHHC19,DUSP1,KLF3,DUSP15,CINP,CDK10,ASCC2,AMHR2,KLHDC8B,BRD3,RELA,ARID4A,AGRP,REM1,LAMB2,TBC1D4,ENTPD4,PSMC3,KIF4B,C3orf84,ADRBK1,ACD,MUC12,MAPK11,TEX9,MAPK3,CNOT8,BNIP3L,CCNA2,IP6K2,HSD11B1,KDELC2,DYNLL1,KIAA1919,ATP2A1,GDPD3,PRR25,RLTPR,IP6K1,FBX…
UKB_460K.blood_MONOCYTE_COUNT	KLRC2,ARHGAP27,PPP2R5A,SPC25,ABHD15,IGDCC4,DUSP15,CCR3,RPL5,APOC1,DEFA5,CCDC18,FAM109A,SUPT4H1,ABCG4,KDELR2,CNN2,CDKN2B,ZNF683,PLCB1,PRKCE,MMS19,BAG5,FOXS1,LYSMD1,GGT5,PALM2-AKAP2,TNFAIP8L2,MARK4,ALDOA,CCDC108,GIT1,COMMD7,PRUNE,CBL,CECR6,ZNF404,KLRC4,XRCC3,ZDHHC16,UGCG,ZNF283,CA14,GDPD3,PTPN11,EIF5,CD52,IFITM3,ITGAL,MAPK3,TADA2A,FIGNL1,DOC2A,SCAMP2,USF1,IL17RA,TTLL12,NLRC5,IFITM2,PRPF3,LINC01272,…
UKB_460K.blood_PLATELET_COUNT	PRKCE,MAST4,RAD51B,ERC2,KALRN,PANX2,QPCTL,ANP32B,METAP1,PCNXL3,EHBP1L1,F2RL1,HDAC9,CDKN2B,THADA,SH2D6,CORO1C,MYL2,TTLL8,SKI,EIF4G1,EVI2A,NACA,GATB,DNASE1L3,POLK,KIF1C,SCAMP1,PIGS,APOC1,ZBTB45,H2AFX,VSTM4,TRPT1,PIM3,PEAR1,CCDC153,ACOX2,GLIS3,CDC20,TAOK1,TLN1,RAB8A,AKIP1,C11orf65,KLHDC8A,RSPH6A,PITPNM2,PTPN11,DENND2D,METTL21B,FBXO24,SF3A1,SIPA1,TAGLN,PRC1,SNX32,ABHD15,RNF167,MLC1,ASB16,CDKN2A,TRABD…
UKB_460K.blood_RBC_DISTRIB_WIDTH	ARHGAP27,GTF2IRD2,NCF1,CPEB4,TMEM259,FADS3,GRIN3B,ELOVL5,TMEM212,PPP1R15A,HSCB,MNS1,NKX6-3,CCDC116,SLC13A2,MPND,PDCD5,ZNF410,GAS6,ATG101,APOC1,OVOL1,SH2B3,KLF1,EIF2AK4,CTXN3,IL2RB,NOL4L,KRI1,FAM24B,PIGC,MLEC,GART,FRS3,AP1M2,SLC4A1,LIN37,LRRC47,SCO2,EEF1D,GYPE,RNFT1,HBS1L,SUMO3,C10orf88,NAPRT,SYCE3,CUZD1,ZBTB32,SURF2,RAD51,PTPN11,COQ5,CABP1,PSTK,PIPOX,RBBP5,POP5,IKZF5,RPL7A,BMP8A,SCGB1C1,MFSD3,RGS…
UKB_460K.blood_RED_COUNT	ARHGAP27,MECOM,PRKCE,GLIS3,HBM,ABCB8,UNC119B,CD36,RAD51B,PTPRF,GADD45GIP1,FOXP1,TFEB,IRF3,PIAS4,SLC4A2,MUC3A,PBRM1,NUTF2,PPAPDC2,HBZ,PRDM16,STARD3,CACNA1C,FAM131C,SULT1A1,RBKS,TRAF3IP3,AZGP1,ATF7,MED20,TMEM106C,CACFD1,BCL7A,SP6,KRTCAP2,RSPO3,CNPY4,SMPD2,KCTD6,PKM,ARHGEF15,EEF2,ZNF646,LOC101929578,ZC3H4,EXOC3L2,RAD23A,KITLG,H2AFV,ENG,GFOD2,DUS2,PNPO,TSNAXIP1,STAB1,RPL23A,TLCD1,ACTN3,ERBB2,RCN3,HOX…
UKB_460K.blood_WHITE_COUNT	PLCB1,FCGR2C,PTPN11,CDH23,PSMD3,ICAM5,RAB37,ZNF513,HECTD4,CADM4,RRP12,KLF2,ICAM4,MGAT4B,CLEC4M,HNRNPK,MARK3,SCUBE3,WDR26,FADS1,LSM10,PPM1G,HIGD1A,SNAPC4,CKM,SDCCAG3,ZSWIM7,CCDC12,INPP5E,IRGQ,CREB3,IFITM1,FAM186A,ATAD2B,IKZF3,CMIP,KIAA1841,RAD17,RSBN1,TRAIP,MED26,SNX22,IL1RN,LOC101928291,DRG1,PPP1R1B,IL36G,NACAD,RAPGEFL1,NBEAL2,MYRF,GCKR,MARK4,MARCH7,IGFBP4,NRBF2,IFITM3,HTT,IFITM5,CHERP,RIN3,ZNF51…
UKB_460K.bmd_HEEL_TSCOREz	ARHGAP27,GPC6,C10orf11,FTO,ERC2,GMDS,PLXDC2,CRHR1,C1orf122,SLC45A1,BNC2,MPP7,RHOC,YRDC,SV2A,MMP2,ZHX3,SF3B4,RWDD2A,CDK2AP1,BTG1,DOT1L,C19orf40,FBXL8,CYP20A1,GPS1,TSR1,XBP1,TSC2,RAP1GAP,ABI2,SRP54,MC5R,CES3,XKR9,G6PC3,XRCC3,ATG13,PPM1N,SLC30A10,IBSP,HSCB,REST,LPIN3,GNG7,TRADD,LOC100506248,TNFRSF11A,SIPA1,SALL1,ZNF484,MOV10,DOCK9,PKD2L1,LOC101929519,ANAPC10,KDELR3,ANKRD13B,PRKG1,GNRH1,TSPYL6,TRMT61…
UKB_460K.body_BALDING1	ARHGAP27,C10orf11,SLC14A2,ZBTB20,PRDM6,RAD51B,ZBTB38,C22orf31,TOP1,METTL10,ATP5SL,ZHX3,C1orf185,FGF5,ZNF462,XBP1,SUCNR1,HOXD3,GORAB,FAF1,CCDC140,LPIN3,METTL7A,MASP2,WNT6,IQGAP1,PRDM8,MAP3K14,FAM118A,HINT3,CDK5R2,BCKDHA,SSPN,EPC1,ZNF774,WNT10A,B3GNT8,CDKN2C,IRF4,BIRC6,PRR23B,TWIST1,FMNL1,DIP2B,ZNRF3,SPATA32,LGR4,RUNX3,CCDC34,EXOSC5,MKLN1,TARDBP,TMEM91,FADS1,PODXL,HDAC9,LHPP,ZFP36L2,FEN1,LIMA1,HOXD…
UKB_460K.body_BMIz	NRXN1,CPNE4,RBFOX1,CADM2,CSMD1,SPNS1,TFAP2B,FTO,SOX5,SNRPD2,FAM57B,DNAJC27,OPCML,SGCZ,LINGO2,GPRC5B,TAOK2,KCNJ12,BCL7A,PIGW,CD19,NFATC2IP,TMEM160,GGNBP2,VKORC1,DNAJC1,MLLT10,PTPRD,HIRIP3,CLN3,IL27,PTRHD1,BCDIN3D,TRMT61A,GDPD3,RBM5,MTIF3,ZCCHC8,C18orf8,CCNE1,CADPS,LMOD1,AGBL4,KCTD13,FIBP,NTM,RABEP2,MAPK3,BPTF,SKOR1,SULT1A2,ZC3H4,PCDH7,QPCTL,DPF3,CELF1,ATP5J2,SLC39A13,LIN7C,ALDOA,ETV5,GIPR,NSUN3,DD…
UKB_460K.body_HEIGHTz	GOLGA6A,WWOX,BNC2,GMDS,LPP,LOC101060022,PRKG1,AUTS2,RAD51B,THRB,ADAMTS17,PTPRG,ZBTB20,FOXP1,RORA,ARHGAP27,PCSK5,TBC1D28,HIVEP3,MECOM,SYN3,ANK3,DLC1,LTBP1,HDAC9,AXIN2,MGA,LPAR1,AMH,ZBTB24,TMEM150A,OGFOD2,UBE2D2,ITGB1BP1,ATP13A1,SLA2,MAPK3,POU2F2,SNUPN,NOP9,MYO1F,AGRP,WIF1,SLC9A5,LAP3,GMPR2,CLDN22,PRDM4,ZNF585B,SLC10A4,ERGIC2,MKRN2,USP36,TIMP2,GHSR,FGF2,RMI1,C16orf13,MXD3,CCNA2,METTL1,COPZ2,SDHA,RP…
UKB_460K.body_WHRadjBMIz	ARHGAP27,PPM1M,CEBPA,FGFR4,CPEB4,CDK2AP1,KCNJ15,TFPI,HMGA1,MLXIPL,C11orf52,PIGC,IDUA,VASN,GORAB,PANO1,SEMA3G,ACTRT2,ALG9,KIAA1683,BAZ1B,WNT3,RILPL2,JUND,OGFOD2,UQCC1,PIH1D2,NMRAL1,C6orf1,EML3,C12orf65,HCAR1,ROM1,GID4,FGF1,ASZ1,MED9,FAM13A,PHF7,IPPK,ATPAF2,GLIS2,RASD1,B3GAT3,RAB3A,NT5DC2,LOC101928726,SLC38A11,SLC22A7,HSPB2,DRG2,TNNC1,C22orf31,TBL2,GATSL3,CRHR1,RAF1,C17orf82,DGKQ,HOXC10,C11orf57,TM…
UKB_460K.bp_DIASTOLICadjMEDz	CACNB2,ULK4,PIEZO2,CSPG5,LRRC10B,PRKCE,MECOM,NPR3,CDC25A,LSP1,ADM,HOXA13,WNT9A,KCNK3,MTCH2,ATG9B,COG2,BDNF,RGS19,PPP1R32,DUSP2,CPEB4,C22orf31,NMT1,RHOC,CYP1A2,SYT7,GRIFIN,CERS5,SOX6,NOS3,MAPKAPK5,RILPL2,LGR4,PSMC3,SNRNP200,MOV10,ATP5E,TMEM165,NPPB,MRVI1,UBN1,EVX1,TMEM194B,MPL,HOXA11,PRDM6,CELF1,TCEA2,MYBPC3,UCKL1,RELA,TRAFD1,UMOD,PDCL2,PPM1J,CYP11B2,MPHOSPH9,TNNT3,HOXA10,HYI,FGF5,MYO9B,SMARCD1,ER…
UKB_460K.bp_SYSTOLICadjMEDz	MECOM,OR4C6,CADM2,TRAPPC9,LHFPL2,CACNB2,ZNF831,HOXA11,WNT3A,CDC16,HOXA13,RYK,PLCE1,HEXIM2,SLC4A7,TNS1,PODXL,ERP29,TNFSF12-TNFSF13,AS3MT,GUCY1A3,CERS5,CDC20,NAA25,RHOC,CFDP1,IGFBP3,ATP2B1,YBX2,ARHGAP42,RPRML,HOXC5,NPPA,OR8H2,OR5M1,S1PR2,NDST2,PLCD3,DCAKD,NR1H3,PPL,NPPB,NADK,SLC22A7,TMEM170A,PHIP,UBN1,INO80,MYBPC3,BRAP,MTCH2,MAP4,NOC3L,MPL,TNNT3,LMAN1L,UFL1,MYOZ1,HOXA10,TRAFD1,GALNT4,OR4C12,CSK,SFX…
UKB_460K.cancer_BREAST	NEK10,TOX3,FGFR2,MAP3K1,SETD9,MIER3,CCDC170,MKL1,EBF1,SLC4A7,FTO,MRPS30,RAD51B,SKIDA1,ADAM29,RIN3,CASC10,LSP1,MLLT10,CRHR1,ZNF365,ATG10,TNNT3,SLC25A17,ANKIB1,TCF7L2,RPS23,KRIT1,CYBRD1,SGSM3,ATE1,CYP51A1,HCN1,DMRTA1,SF3B4,CPNE3,PTHLH,GRHL1,CMSS1,RUSC1-AS1,PLEKHM1,ZMIZ1,CDKN2A,PEX14,AKAP9,PDLIM4,OVOL1,RUSC1,FILIP1L,BPIFA1,ISYNA1,TERT,LRRD1,RCCD1,ATP6AP1L,BPIFA3,FDPS,SLC22A5,SYNE1,FGD6,SOX6,TRIM32,S…
UKB_460K.cov_EDU_COLLEGE	CHST10,ARHGAP27,TMED5,KDM4A,PTPRF,SEMA3F,DCC,WNT3,SLC38A3,GNAT1,IP6K1,MGEA5,LONRF2,SULT1A2,USP4,CRHR1,NEGR1,CTNNA3,ELOVL7,TET2,PCDH17,C3orf62,CCDC101,PDE4D,RBFOX1,NUPR1,NSF,CAMKV,MST1R,CAMTA1,TTC29,AMIGO3,SULT1A1,CELF2,EXOC4,C12orf65,B4GALT2,GMPPB,GRK4,CADM2,ATP6V0B,ZSWIM6,BARHL2,MPHOSPH9,RBM6,FOXP1,C3orf84,NDUFAF2,PITPNM2,FAM76B,CEP170,MON1A,MTMR2,RABEP2,CALN1,HPS6,NOP14,DPH2,TMEM89,CCDC18,NRXN1…
UKB_460K.cov_EDU_YEARS	SETD8,C12orf65,TET2,SLC38A3,APOBR,CHST10,TRAIP,MPHOSPH9,CCDC101,MTMR2,ERCC8,IL27,PCDH17,NUPR1,ATP6V0B,RHOA,RILPL2,MGEA5,CDK2AP1,ARTN,C3orf62,KDM4A,GNAT1,LONRF2,B4GALT2,FPGT-TNNI3K,CADM2,FAM76B,CEP57,AMIGO3,FPGT,NEGR1,DCC,CDH13,CRHR1,CELF4,CAMKV,DPH2,NRXN1,EXOC4,CELF2,KLHDC8B,DFNA5,MON1A,LRRIQ3,ST3GAL3,C4orf45,RAB5B,IPO13,NRBF2,UBA7,C18orf8,MED27,NPC1,NSF,TENM2,ZSWIM6,ERBB3,AFF3,CDK2,SEMA3F,SUOX,P…
UKB_460K.cov_SMOKING_STATUS	SEMA6D,CADM2,WBP1L,CNNM2,KIAA1919,TRAF3IP2,AS3MT,C10orf32,REV3L,SIX3,TENM2,NCAM1,SDK1,ELAVL4,ARL3,SFXN2,GAPVD1,CLU,MAPKAP1,PPP6C,SCAI,BDNF,MAML3,CYP17A1,FAM163B,PTPRF,RABEPK,NTM,WDR24,STUB1,ARID5B,FBXL16,JMJD8,LAMA2,TPM3,TRIM8,DCC,NT5C2,TTC29,PDE4B,NYAP2,FAM195A,OPCML,CELF2,NRXN1,KDM4A,RHBDL1,NOL4L,NECAB1,ZFHX3,BSN,ESRRG,EFNA5,C3orf62,LRRC4C,FPGT-TNNI3K,CCDC36,ATP5J2-PTCD1,WDR90,TNNI3K,NFAT5,CPSF…
UKB_460K.disease_AID_ALL	TRAFD1,C9orf156,PTPN22,BCL2L15,PTPN2,SH2B3,ALDH2,PTPN11,RNASET2,CTLA4,FAM109A,ACAD10,NAA25,BACH2,FGFR1OP,OLFML3,RASGRP1,ARID5B,DCLRE1B,IRF5,HECTD4,BRAP,WISP1,LPP,VAV3,TMEM116,C5orf30,MAPKAPK5,AP4B1,NAB1,FAM213B,MMEL1,IL2RA,FOXE1,PHTF1,ATXN2,CUX2,MAGI3,RSBN1,STAT4,MYL2,ICOS,CDC37,IL2,PMEL,TICAM1,C1QTNF6,RAB5B,HIPK1,IRF4,GOLGB1,CDK2,TTC34,RAVER1,UBE2L3,ANP32B,YDJC,CCDC116,ERP29,SSTR3,ERBB3,KIAA1109…
UKB_460K.disease_ALLERGY_ECZEMA_DIAGNOSED	LPP,C11orf30,SDR9C7,SUOX,IL13,CD247,NAB2,SLC25A46,STAT6,CDK2,SMARCE1,D2HGDH,DEXI,COQ10B,TMEM180,MARS2,IKZF4,ACTR1A,IL21,GAL3ST2,SF3B1,BOLL,OVOL1,TNFSF4,HSPE1-MOB4,LOC100506127,TLR6,ERBB3,PLCL1,PRKRIR,ZNF217,ILDR1,RTF1,FAM114A1,NFKB1,IL1R1,LOC101927853,ZBTB38,CLEC16A,MOB4,TSLP,RAB5B,AP5B1,ZPBP2,MED24,AHI1,TRAF1,UGT3A1,SMAD3,KLF3,RDH16,IL2,JAZF1,LRRC32,KLF5,KRT222,RUNX3,SLC9A2,EXD1,BATF3,SLC15A2,PM…
UKB_460K.disease_ASTHMA_DIAGNOSED	LPP,GSDMB,IL4R,CSF3,GSDMA,ADAD1,CD247,ERBB2,PMEL,TLR1,IL5,PNMT,GPR183,RAB5B,C11orf30,IKZF3,NSMCE1,TSLP,IL13,NAB2,TLR10,P4HA2,PSMD3,IL4,KIAA1109,PPP1R1B,PDLIM4,D2HGDH,GAL3ST2,IRF1,SDR9C7,PGAP3,NDFIP1,IL33,DEXI,CLEC16A,LRP1,THRA,MED24,FEN1,ZPBP2,IL18R1,SLC22A5,IL2,SLC22A4,SEPT8,SMAD3,SLC9A4,TBL1XR1,RAD50,ERBB3,GRB7,LRRC3C,TMEM258,PLXNC1,LOC100506127,FADS2,PRKRIR,FADS1,LOC101928947,SLC25A46,ZNF652,R…
UKB_460K.disease_CARDIOVASCULAR	MECOM,CACNB2,PCCB,ZPR1,TOMM40,CACNA1D,CELSR2,ARHGAP42,APOA5,FGF5,FES,NPPB,FURIN,PSRC1,RGS19,SH2B3,PVRL2,CLCN6,APOC1,TCEA2,KCNK3,MYBPC3,CYP1A2,ATP2B1,CPLX3,LMAN1L,CSK,APOB,FAM109A,SCAMP2,ULK3,NPPA,HAUS8,ZNF831,GUCY1A3,ZNF652,BUD13,MADD,ABCG8,ABHD17C,C1GALT1,ZNF318,NPR3,BCL3,MYO9B,UMOD,MPI,HOXC4,CUX2,CASZ1,CRIP3,AGT,CCDC33,GPN2,HOXC5,KDM2B,WNT2B,APOE,ACE,HOXC6,MAMSTR,PHB,COX5A,CHMP1A,DDB2,NR1H3,CYP…
UKB_460K.disease_HYPERTENSION_DIAGNOSED	MECOM,MAPKAPK5,CACNB2,NEK10,SCAMP2,CSK,AGT,HOXA11,TMEM116,MYBPC3,CPLX3,CYP1A2,UMOD,SH2B3,LMAN1L,ACP2,SLC22A7,ARHGAP42,ULK3,FES,DDB2,SPI1,HOXC4,ENPEP,NPPB,TRAFD1,PSMC3,TNNT3,PTPN11,SLC4A7,WNT2B,PHB,ATXN2,ABHD17C,NPPA,HOXA13,CELF1,HECTD4,BRAP,RAPSN,DPEP1,GUCY1A3,ZNF652,ZNF318,CUX2,FGF5,NR1H3,PDILT,C1GALT1,OVOL1,HOXC6,C1orf167,SPATA33,FAM109A,UBE2D3,SOX6,LSP1,CISD2,CDC25A,CHDH,CHP1,ZNF831,HAUS8,FTO,…
UKB_460K.disease_HYPOTHYROIDISM_SELF_REP	CTLA4,PMEL,ALDH2,LPP,SSTR3,BRAP,TRAFD1,MYL2,RASGRP1,FAM109A,PHTF1,C1QTNF6,PTPN11,SH2B3,ATXN2,RAB5B,TBX21,FOXE1,HIPK1,DCLRE1B,HECTD4,ICOS,ANP32B,CDK2,CCR6,SUOX,ACAD10,IL2RA,RTKN2,RNASET2,VAV3,C12orf42,RSBN1,TIMP4,PLEKHA1,ARID5B,BACH2,TICAM1,FGFR1OP,SLC1A2,MAGI3,PTPN22,ERP29,SYN2,NAA25,SPATA13,ERBB3,PRMT1,STAT1,BRD7,IKZF4,TLR3,CCDC88B,BCL2L15,IRF4,HORMAD2,PHF20L1,FADS1,JUND,XPA,NFATC1,TIMMDC1,FEN1,…
UKB_460K.disease_RESPIRATORY_ENT	LPP,GSDMA,CDK2,PMEL,NAB2,CSF3,GPR183,PGAP3,IL13,IL5,NSMCE1,C11orf30,STAT6,ERBB2,TLR10,CD247,TSLP,KIAA1109,IL4,D2HGDH,GAL3ST2,PDLIM4,ZPBP2,PSMD3,GSDMB,PPP1R1B,RAB5B,MED24,WDR36,ADAD1,IKZF4,IL1RL2,RAD50,IL4R,IL2,IL18R1,THRA,BACH2,KIF3A,NDFIP1,GRB7,SDR9C7,SMAD3,STARD3,IL1R1,LRRC3C,JAZF1,TCHH,FEN1,TLR1,P4HA2,LOC100506127,SLC22A5,ERBB3,SUOX,ZNF652,LRP1,TMEM258,GPR18,TPD52L3,IRF1,IQCH,SLC22A4,FADS1,FAD…
UKB_460K.impedance_BASAL_METABOLIC_RATEz	RBFOX1,SOX5,CADM2,PARD3,PRKG1,AGBL4,HS6ST3,NUDT6,PRICKLE4,MUC1,C17orf82,IP6K1,PABPC1L,LUZP1,CDK5RAP1,CPNE4,TBX2,UBE2D2,NRXN1,CDC14B,ORAOV1,VPS33A,RARB,ADRBK1,CASKIN1,NCOR2,SLFNL1,NECAB3,TMEM241,TP53,ADAM15,MMP24,SLA2,FRS3,RAB5B,NTAN1,SLC35D2,ATXN2L,KCTD15,KCNH2,SCN4A,ACAN,SNTA1,AXIN1,FAM133B,VKORC1,RPN2,TRPC4AP,CTPS1,RAB26,TRAIP,C10orf11,CSF2,NPPC,SIX1,C1orf185,MRPS31,FAM83C,METRN,CYBRD1,CAMKV,RB…
UKB_460K.lung_FEV1FVCzSMOKE	FRMD4A,ERC2,MECOM,DLC1,CHRM3,KCNQ5,THSD4,TYRO3,C17orf98,GLIS3,CROCC,C16orf86,CABP7,COPS6,SPTBN5,MMP15,ATP6V0D1,ZNF319,RAB5B,PTCH1,NARS2,LOX,MAPKBP1,ZNF474,CYFIP2,BCAS3,RSPH6A,HOXC4,QPCTL,PSKH1,OTUD4,ASCC2,RPAP2,KLHL21,TEPP,BMP4,TSPAN3,ABHD15,FAF1,ISL2,INTS12,AGRP,BHMG1,PMEL,PARD6A,C1GALT1,CPD,SYMPK,ABCE1,C10orf11,DNAJC11,SEC61A1,SPINK7,FOXA3,C5orf52,HOXC5,ANKRD13B,NSRP1,TBC1D29,TIGD2,GFOD2,SOX30,…
UKB_460K.lung_FVCzSMOKE	ARHGAP27,MECOM,HDAC9,EML3,CLUAP1,TUT1,CROCC,CEP63,SLC2A4RG,CTSK,STMN3,EFEMP1,RDH14,GANAB,TNFRSF6B,TRIM71,NR5A2,ZBTB46,MTA2,ADAMTSL4,RAC3,CTSS,EEF1G,LHX3,ATP13A2,INTS12,UBXN1,ARFRP1,CCR4,HSD3B7,LIME1,DCXR,ROM1,LRRC45,LBHD1,HOXC4,VRTN,B3GAT3,SPAG4,ENSA,CPNE1,CERS2,TTC30A,MCL1,DNASE1,SDHB,BMF,P4HA2,QSOX2,CDK12,KY,WWOX,UQCC1,HOXC9,NLRC3,RTEL1,HTR4,TTC30B,TBX2,CABLES1,SLX4,CLIC6,GDF5,CRHR1,PLEKHO1,MFA…
UKB_460K.mental_NEUROTICISM	ARHGAP27,TCF4,YLPM1,CRHR1,PROX2,DLST,WNT3,DRD2,ANKK1,RBFOX1,TTC12,PAX6,NCAM1,ELAVL2,ACVR2A,GRM8,TOX3,TMX2,KCTD10,MVK,MYO1H,DCC,ARPP21,CELF4,SOX5,RPS6KL1,BAIAP2,STAG1,LINGO2,SORCS3,TAOK3,PACSIN3,VRK2,SUDS3,ARFGAP2,CADM2,ASXL3,MAP1LC3B,MTCH2,MBD5,PCCB,NSF,PTPMT1,PLEKHM1,RANGAP1,FAM120AOS,NTRK2,KCNJ3,NCOA5,MMAB,CLUH,CELF1,AREL1,C11orf49,UBE3B,EXD2,ORAI3,STX1B,SEMA6D,HSD3B7,CD40,FNBP4,PSMC3,SETD1A,IL…
UKB_460K.other_MORNINGPERSON	VAMP3,CPNE8,HCRTR2,PRPF3,SOX5,PER3,MRPS21,RPRD2,LRRTM4,SEC11C,ANP32E,GPR61,FBXL3,ALG10B,RNASEL,KAZN,GNAI3,APH1A,AK5,CIART,HNRNPD,ZFP91,LOC339862,GFRAL,CLN5,EIF4G3,TARS2,ALG10,CA14,FOXP4,DENND1A,OR5B12,C1orf54,TNRC6B,GNAO1,RGS16,LPXN,ILKAP,C17orf59,NAPEPLD,FAM185A,MST1R,TMEM108,ECM1,VAMP2,DDC,HP1BP3,GRB10,ROBO2,PHACTR1,GNAT2,C9orf64,PLCL1,SLC38A3,DGKG,OR5B2,CNTF,FTO,PAX5,SEMA3F,HTR6,HNRNPK,ATE1,CA…
UKB_460K.pigment_HAIR	FRAS1,BNC2,GABRG3,GRM5,ADGRV1,TYRP1,MAPRE1,AAR2,GDF5,PAX3,SNX17,CDK5RAP3,CDH15,FNDC4,TBC1D30,C1orf127,TRMT61A,SLC12A9,TMCC2,DCXR,CLIC5,CNTN2,SLA2,HOXB8,LRRC46,ACTG1,GALNT4,C9orf156,MANBAL,MSX2,RAC3,RXFP3,GPS1,GCNT2,TGIF2-C20orf24,CBFA2T2,ZC3H18,ITCH,FGF5,USP35,CDK10,AKAP12,MVD,EFNA4,POC1B-GALNT4,LOC283278,EXOC2,VPS9D1,RFNG,RELA,FSCN2,ATP2B1,KRT37,CCDC137,TLDC2,HSPBAP1,SAMHD1,PIGU,C11orf58,ZNF513,…
UKB_460K.repro_MENARCHE_AGE	CSMD1,UBL5,TEX264,C3orf18,KMT2B,GRM2,PIN1,ZC3H4,CCNJ,GADD45G,KLHDC8B,EEFSEC,PTPRF,ABHD17A,IGFLR1,ZNF483,U2AF1L4,REXO1,MAP2K5,MTCH2,ATP8B3,IER3IP1,JADE2,ZNF518A,HEMK1,DET1,NR5A1,ARL6IP6,KLF16,C14orf39,VGLL3,PRPF40A,STXBP4,C3orf62,GNAT1,PRDM2,SLC38A3,CTBP2,KDM4A,BRWD1,LIN37,HDHD2,STAB1,BEND6,GTF2IRD2,NCF1,CCDC36,ADGRD2,OLFM2,PRDM13,SMARCAD1,KATNAL2,SPI1,WDR25,LRP1B,IP6K1,SEC16B,WARS,CCDC85A,PSMG1,R…
UKB_460K.repro_MENOPAUSE_AGE	TMEM106A,PNMT,GCM2,GTF3C2,LRRN4,EIF4EBP1,RSL1D1,VAT1,TNFRSF17,NLRP11,SNX17,KDELR3,FNDC4,COX6B2,SUV420H2,RHBDL2,CRLS1,ERBB2,GSPT1,NBR1,GCKR,MYCBP,HSPBP1,TRMT6,GTPBP1,SUN2,MRPS18C,RRAGC,POLG,MCM8,ZNF346,AGPAT9,RND2,ZNF276,SYCP2L,CBY1,PPP6R1,CHP1,BRCA1,GOT1L1,NRBP1,FRYL,DDX17,OIP5,NUSAP1,STARD3,TDRD3,TLK1,PIWIL1,JOSD1,OCIAD1,DIDO1,FAM227A,STX6,SLC10A4,INO80,RTF1,ZFPM1,ARID3A,DMC1,NDUFAF1,PAPD7,PGAP3…
UKB_460K.repro_NumberChildrenEverBorn_Pooled	CADM2,ESR1,SEMA3F,MST1R,FADS1,MTMR3,CRHR1,CCDC170,ST18,MON1A,GNAT1,FADS2,CAMKV,FEN1,TMEM258,WNT4,ENO4,ZBTB20,DEF8,NSF,RBM6,RBM5,PLEKHM1,WNT3,ARHGAP27,MYRF,CENPBD1,ASCC2,HORMAD2,TRAIP,SLC38A3,KIAA1598,CPNE7,CKAP5,ITGAM,LOC101929578,FBXL20,LRP4,ZMAT5,DNAH11,DBNDD1,ARHGAP1,ATG13,UQCR10,FADS3,UBE2E1,NR1D2,ZNF408,CDK12,GRID2,MED1,MDK,CHRM4,CISD2,AMBRA1,RPL15,DGKZ,CHD7,DAB1,UBE2D3,SNTG1,PACSIN3,KCNE1,M…

## Sheet: ST7 MSigDB terms
naive_cd4	memory_cd4	effector_cd4	naive_cd8	memory_cd8	effector_cd8	SUBTYPE_Treg	SUBTYPE_Th1	SUBTYPE_Th2	SUBTYPE_Th17
GSE11057_NAIVE_VS_CENT_MEMORY_CD4_TCELL_UP	GSE11057_NAIVE_VS_CENT_MEMORY_CD4_TCELL_DN	GSE15659_NAIVE_CD4_TCELL_VS_ACTIVATED_TREG_DN	KAECH_NAIVE_VS_DAY8_EFF_CD8_TCELL_UP	GSE10239_MEMORY_VS_DAY4.5_EFF_CD8_TCELL_UP	GOLDRATH_EFF_VS_MEMORY_CD8_TCELL_UP	GSE14308_NAIVE_CD4_TCELL_VS_INDUCED_TREG_DN	GSE11924_TH1_VS_TH17_CD4_TCELL_UP	GSE11924_TH1_VS_TH2_CD4_TCELL_DN	GSE11924_TH1_VS_TH17_CD4_TCELL_DN
GSE11057_NAIVE_VS_EFF_MEMORY_CD4_TCELL_UP	GSE11057_NAIVE_VS_MEMORY_CD4_TCELL_DN	GSE22886_NAIVE_CD4_TCELL_VS_12H_ACT_TH1_DN	KAECH_NAIVE_VS_DAY15_EFF_CD8_TCELL_UP	GSE16522_MEMORY_VS_NAIVE_CD8_TCELL_UP	GOLDRATH_NAIVE_VS_EFF_CD8_TCELL_DN	GSE14308_NAIVE_CD4_TCELL_VS_NATURAL_TREG_DN	GSE11924_TH1_VS_TH2_CD4_TCELL_UP	GSE11924_TH2_VS_TH17_CD4_TCELL_UP	GSE11924_TH2_VS_TH17_CD4_TCELL_DN
GSE11057_NAIVE_VS_MEMORY_CD4_TCELL_UP	GSE22886_NAIVE_CD4_TCELL_VS_MEMORY_TCELL_DN	GSE22886_NAIVE_CD4_TCELL_VS_12H_ACT_TH2_DN	KAECH_NAIVE_VS_MEMORY_CD8_TCELL_UP	GSE32423_MEMORY_VS_NAIVE_CD8_TCELL_UP	GSE10239_MEMORY_VS_DAY4.5_EFF_CD8_TCELL_DN	GSE14308_TH17_VS_INDUCED_TREG_DN	GSE14026_TH1_VS_TH17_UP	GSE14308_TH2_VS_INDUCED_TREG_UP	GSE14026_TH1_VS_TH17_DN
GSE15659_NAIVE_CD4_TCELL_VS_ACTIVATED_TREG_UP	GSE26928_NAIVE_VS_CENT_MEMORY_CD4_TCELL_DN	GSE22886_NAIVE_CD4_TCELL_VS_48H_ACT_TH1_DN	GOLDRATH_NAIVE_VS_EFF_CD8_TCELL_UP	KAECH_NAIVE_VS_MEMORY_CD8_TCELL_DN	GSE10239_MEMORY_VS_KLRG1HIGH_EFF_CD8_TCELL_DN	GSE14308_TH17_VS_NATURAL_TREG_DN	GSE14308_TH1_VS_INDUCED_TREG_UP	GSE14308_TH2_VS_NAIVE_CD4_TCELL_UP	GSE14308_TH17_VS_INDUCED_TREG_UP
GSE22886_NAIVE_CD4_TCELL_VS_12H_ACT_TH1_UP	GSE43863_DAY6_EFF_VS_DAY150_MEM_LY6C_INT_CXCR5POS_CD4_TCELL_DN	GSE22886_NAIVE_CD4_TCELL_VS_48H_ACT_TH2_DN	GOLDRATH_NAIVE_VS_MEMORY_CD8_TCELL_UP	KAECH_DAY8_EFF_VS_MEMORY_CD8_TCELL_DN	GSE10239_MEMORY_VS_KLRG1INT_EFF_CD8_TCELL_DN	GSE14308_TH1_VS_INDUCED_TREG_DN	GSE14308_TH1_VS_NAIVE_CD4_TCELL_UP	GSE14308_TH2_VS_NATURAL_TREG_UP	GSE14308_TH17_VS_NAIVE_CD4_TCELL_UP
GSE22886_NAIVE_CD4_TCELL_VS_12H_ACT_TH2_UP	GSE43863_DAY6_EFF_VS_DAY150_MEM_TFH_CD4_TCELL_DN	GSE28726_NAIVE_VS_ACTIVATED_CD4_TCELL_DN	GSE10239_NAIVE_VS_MEMORY_CD8_TCELL_UP	KAECH_DAY15_EFF_VS_MEMORY_CD8_TCELL_DN	GSE10239_NAIVE_VS_DAY4.5_EFF_CD8_TCELL_DN	GSE14308_TH1_VS_NATURAL_TREG_DN	GSE14308_TH1_VS_NATURAL_TREG_UP	GSE14308_TH2_VS_TH17_UP	GSE14308_TH17_VS_NATURAL_TREG_UP
GSE22886_NAIVE_CD4_TCELL_VS_48H_ACT_TH1_UP	GSE43863_DAY6_EFF_VS_DAY150_MEM_TH1_CD4_TCELL_DN	GSE43863_DAY6_EFF_VS_DAY150_MEM_LY6C_INT_CXCR5POS_CD4_TCELL_UP	GSE10239_NAIVE_VS_DAY4.5_EFF_CD8_TCELL_UP	GOLDRATH_NAIVE_VS_MEMORY_CD8_TCELL_DN	GSE10239_NAIVE_VS_KLRG1HIGH_EFF_CD8_TCELL_DN	GSE14308_TH2_VS_INDUCED_TREG_DN	GSE14308_TH1_VS_TH17_UP	GSE14308_TH2_VS_TH1_UP	GSE14308_TH1_VS_TH17_DN
GSE22886_NAIVE_CD4_TCELL_VS_48H_ACT_TH2_UP		GSE43863_DAY6_EFF_VS_DAY150_MEM_TFH_CD4_TCELL_UP	GSE15324_NAIVE_VS_ACTIVATED_CD8_TCELL_UP	GOLDRATH_EFF_VS_MEMORY_CD8_TCELL_DN	GSE10239_NAIVE_VS_KLRG1INT_EFF_CD8_TCELL_DN	GSE14308_TH2_VS_NATURAL_TREG_DN	GSE14308_TH2_VS_TH1_DN	GSE22886_NAIVE_CD4_TCELL_VS_12H_ACT_TH2_DN	GSE14308_TH2_VS_TH17_DN
GSE22886_NAIVE_CD4_TCELL_VS_MEMORY_TCELL_UP		GSE43863_DAY6_EFF_VS_DAY150_MEM_TH1_CD4_TCELL_UP	GSE15930_NAIVE_VS_24H_IN_VITRO_STIM_CD8_TCELL_UP	GSE10239_NAIVE_VS_MEMORY_CD8_TCELL_DN	GSE14699_NAIVE_VS_ACT_CD8_TCELL_DN	GSE15659_NAIVE_CD4_TCELL_VS_ACTIVATED_TREG_DN	GSE22886_NAIVE_CD4_TCELL_VS_12H_ACT_TH1_DN	GSE22886_NAIVE_CD4_TCELL_VS_48H_ACT_TH2_DN	GSE26030_TH1_VS_TH17_DAY15_POST_POLARIZATION_DN
GSE26928_NAIVE_VS_CENT_MEMORY_CD4_TCELL_UP		GSE43955_TH0_VS_TGFB_IL6_IL23_TH17_ACT_CD4_TCELL_52H_DN	GSE15930_NAIVE_VS_24H_IN_VITRO_STIM_IL12_CD8_TCELL_UP	GSE22886_NAIVE_CD8_TCELL_VS_MEMORY_TCELL_DN	GSE15324_NAIVE_VS_ACTIVATED_CD8_TCELL_DN	GSE15659_NAIVE_CD4_TCELL_VS_RESTING_TREG_DN	GSE22886_NAIVE_CD4_TCELL_VS_48H_ACT_TH1_DN	GSE22886_TH1_VS_TH2_12H_ACT_DN	GSE26030_TH1_VS_TH17_DAY5_POST_POLARIZATION_DN
GSE26928_NAIVE_VS_EFF_MEMORY_CD4_TCELL_UP		GSE43955_TH0_VS_TGFB_IL6_IL23_TH17_ACT_CD4_TCELL_60H_DN	GSE15930_NAIVE_VS_24H_IN_VITRO_STIM_INFAB_CD8_TCELL_UP	GSE9650_NAIVE_VS_MEMORY_CD8_TCELL_DN	GSE15930_NAIVE_VS_24H_IN_VITRO_STIM_CD8_TCELL_DN	GSE20366_TREG_VS_NAIVE_CD4_TCELL_DEC205_CONVERSION_UP	GSE22886_TH1_VS_TH2_12H_ACT_UP	GSE22886_TH1_VS_TH2_48H_ACT_DN	GSE26030_TH1_VS_TH17_RESTIMULATED_DAY15_POST_POLARIZATION_DN
GSE28726_NAIVE_VS_ACTIVATED_CD4_TCELL_UP		GSE43955_TH0_VS_TGFB_IL6_TH17_ACT_CD4_TCELL_10H_DN	GSE15930_NAIVE_VS_48H_IN_VITRO_STIM_CD8_TCELL_UP	GSE9650_EFFECTOR_VS_MEMORY_CD8_TCELL_DN	GSE15930_NAIVE_VS_24H_IN_VITRO_STIM_IL12_CD8_TCELL_DN	GSE20366_TREG_VS_NAIVE_CD4_TCELL_HOMEOSTATIC_CONVERSION_UP	GSE22886_TH1_VS_TH2_48H_ACT_UP		GSE26030_TH1_VS_TH17_RESTIMULATED_DAY5_POST_POLARIZATION_DN
GSE43955_TH0_VS_TGFB_IL6_IL23_TH17_ACT_CD4_TCELL_52H_UP		GSE43955_TH0_VS_TGFB_IL6_TH17_ACT_CD4_TCELL_1H_DN	GSE15930_NAIVE_VS_48H_IN_VITRO_STIM_IL12_CD8_TCELL_UP	GSE9650_EXHAUSTED_VS_MEMORY_CD8_TCELL_DN	GSE15930_NAIVE_VS_24H_IN_VITRO_STIM_INFAB_CD8_TCELL_DN	GSE20366_TREG_VS_NAIVE_CD4_TCELL_UP	GSE26030_TH1_VS_TH17_DAY15_POST_POLARIZATION_UP		GSE32901_NAIVE_VS_TH17_ENRICHED_CD4_TCELL_DN
GSE43955_TH0_VS_TGFB_IL6_IL23_TH17_ACT_CD4_TCELL_60H_UP		GSE43955_TH0_VS_TGFB_IL6_TH17_ACT_CD4_TCELL_20H_DN	GSE15930_NAIVE_VS_48H_IN_VITRO_STIM_IFNAB_CD8_TCELL_UP		GSE15930_NAIVE_VS_48H_IN_VITRO_STIM_CD8_TCELL_DN	GSE24634_NAIVE_CD4_TCELL_VS_DAY10_IL4_CONV_TREG_DN	GSE26030_TH1_VS_TH17_DAY5_POST_POLARIZATION_UP		GSE32901_NAIVE_VS_TH17_NEG_CD4_TCELL_DN
GSE43955_TH0_VS_TGFB_IL6_TH17_ACT_CD4_TCELL_10H_UP		GSE43955_TH0_VS_TGFB_IL6_TH17_ACT_CD4_TCELL_30H_DN	GSE15930_NAIVE_VS_72H_IN_VITRO_STIM_CD8_TCELL_UP		GSE15930_NAIVE_VS_48H_IN_VITRO_STIM_IFNAB_CD8_TCELL_DN	GSE24634_NAIVE_CD4_TCELL_VS_DAY3_IL4_CONV_TREG_DN	GSE26030_TH1_VS_TH17_RESTIMULATED_DAY15_POST_POLARIZATION_UP		GSE32901_TH1_VS_TH17_ENRICHED_CD4_TCELL_DN
GSE43955_TH0_VS_TGFB_IL6_TH17_ACT_CD4_TCELL_1H_UP		GSE43955_TH0_VS_TGFB_IL6_TH17_ACT_CD4_TCELL_42H_DN	GSE15930_NAIVE_VS_72H_IN_VITRO_STIM_IL12_CD8_TCELL_UP		GSE15930_NAIVE_VS_48H_IN_VITRO_STIM_IL12_CD8_TCELL_DN	GSE24634_NAIVE_CD4_TCELL_VS_DAY5_IL4_CONV_TREG_DN	GSE26030_TH1_VS_TH17_RESTIMULATED_DAY5_POST_POLARIZATION_UP		GSE32901_TH1_VS_TH17_NEG_CD4_TCELL_DN
GSE43955_TH0_VS_TGFB_IL6_TH17_ACT_CD4_TCELL_20H_UP		GSE43955_TH0_VS_TGFB_IL6_TH17_ACT_CD4_TCELL_4H_DN	GSE15930_NAIVE_VS_72H_IN_VITRO_STIM_IFNAB_CD8_TCELL_UP		GSE15930_NAIVE_VS_72H_IN_VITRO_STIM_CD8_TCELL_DN	GSE24634_NAIVE_CD4_TCELL_VS_DAY7_IL4_CONV_TREG_DN	GSE32901_NAIVE_VS_TH1_CD4_TCELL_DN		GSE43955_TH0_VS_TGFB_IL6_IL23_TH17_ACT_CD4_TCELL_52H_DN
GSE43955_TH0_VS_TGFB_IL6_TH17_ACT_CD4_TCELL_30H_UP		GSE43955_TH0_VS_TGFB_IL6_TH17_ACT_CD4_TCELL_52H_DN	GSE15930_NAIVE_VS_72H_IN_VITRO_STIM_TRICHOSTATINA_CD8_TCELL_UP		GSE15930_NAIVE_VS_72H_IN_VITRO_STIM_IFNAB_CD8_TCELL_DN	GSE40685_NAIVE_CD4_TCELL_VS_TREG_DN	GSE32901_TH1_VS_TH17_ENRICHED_CD4_TCELL_UP		GSE43955_TH0_VS_TGFB_IL6_IL23_TH17_ACT_CD4_TCELL_60H_DN
GSE43955_TH0_VS_TGFB_IL6_TH17_ACT_CD4_TCELL_42H_UP		GSE43955_TH0_VS_TGFB_IL6_TH17_ACT_CD4_TCELL_60H_DN	GSE19825_NAIVE_VS_DAY3_EFF_CD8_TCELL_UP		GSE15930_NAIVE_VS_72H_IN_VITRO_STIM_IL12_CD8_TCELL_DN		GSE32901_TH1_VS_TH17_NEG_CD4_TCELL_UP		GSE43955_TH0_VS_TGFB_IL6_TH17_ACT_CD4_TCELL_10H_DN
GSE43955_TH0_VS_TGFB_IL6_TH17_ACT_CD4_TCELL_4H_UP			GSE26495_NAIVE_VS_PD1HIGH_CD8_TCELL_UP		GSE15930_NAIVE_VS_72H_IN_VITRO_STIM_TRICHOSTATINA_CD8_TCELL_DN				GSE43955_TH0_VS_TGFB_IL6_TH17_ACT_CD4_TCELL_1H_DN
GSE43955_TH0_VS_TGFB_IL6_TH17_ACT_CD4_TCELL_52H_UP			GSE26495_NAIVE_VS_PD1LOW_CD8_TCELL_UP		GSE19825_NAIVE_VS_DAY3_EFF_CD8_TCELL_DN				GSE43955_TH0_VS_TGFB_IL6_TH17_ACT_CD4_TCELL_20H_DN
GSE43955_TH0_VS_TGFB_IL6_TH17_ACT_CD4_TCELL_60H_UP			GSE9650_NAIVE_VS_EFF_CD8_TCELL_UP		GSE19825_NAIVE_VS_IL2RAHIGH_DAY3_EFF_CD8_TCELL_DN				GSE43955_TH0_VS_TGFB_IL6_TH17_ACT_CD4_TCELL_30H_DN
			GSE9650_NAIVE_VS_EXHAUSTED_CD8_TCELL_UP		GSE19825_NAIVE_VS_IL2RALOW_DAY3_EFF_CD8_TCELL_DN				GSE43955_TH0_VS_TGFB_IL6_TH17_ACT_CD4_TCELL_42H_DN
			GSE9650_NAIVE_VS_MEMORY_CD8_TCELL_UP		GSE40666_NAIVE_VS_EFFECTOR_CD8_TCELL_DN				GSE43955_TH0_VS_TGFB_IL6_TH17_ACT_CD4_TCELL_4H_DN
			GSE16522_MEMORY_VS_NAIVE_CD8_TCELL_DN		GSE41867_NAIVE_VS_EFFECTOR_CD8_TCELL_DN				GSE43955_TH0_VS_TGFB_IL6_TH17_ACT_CD4_TCELL_52H_DN
			GSE32423_MEMORY_VS_NAIVE_CD8_TCELL_DN		GSE44649_NAIVE_VS_ACTIVATED_CD8_TCELL_DN				GSE43955_TH0_VS_TGFB_IL6_TH17_ACT_CD4_TCELL_60H_DN
					GSE9650_EFFECTOR_VS_EXHAUSTED_CD8_TCELL_UP
					GSE9650_EFFECTOR_VS_MEMORY_CD8_TCELL_UP
					GSE9650_NAIVE_VS_EFF_CD8_TCELL_DN
					KAECH_DAY15_EFF_VS_MEMORY_CD8_TCELL_UP
					KAECH_DAY8_EFF_VS_MEMORY_CD8_TCELL_UP
					KAECH_NAIVE_VS_DAY15_EFF_CD8_TCELL_DN
					KAECH_NAIVE_VS_DAY8_EFF_CD8_TCELL_DN

## Sheet: ST8 Signature gene sets
TRAIT	GENESET
naive_cd4	AIF1,ACTN1,CD248,CCR7,KLF7,PKIG,SETD1B,IPCEF1,LEF1,PRKCA,FCGRT,PHGDH,PLXDC1,CERS6,SATB1,MEF2A,EVX1,EVL,LITAF,FLOT2,ISG20,SMAGP,BCL2,TXNIP,RYK,MFGE8,CBX7,MRNIP,RPS5,ZBTB18,ZC4H2,PECAM1,NET1,RIPOR2,VNN2,MYB,OCRL,SCML2,TRABD2A,PLLP,SLC8B1,PLAC8,RNF175,LTBP3,CD55,AEBP1,ITGA6,ALS2CL,CD7,SPPL2B,TTC28,KLHL3,NAA16,RIN1,CD8B,IL6ST,CRTC3,CLCN5,SNHG32,RFLNB,ABLIM1,TPCN1,H1-0,ZNF879,GNAI1,TCF7,ACSS2,KRT2,CDC…
memory_cd4	PRDX1,SLAMF1,ST8SIA1,SLC2A3,SMC6,DUSP10,FXYD7,CHST11,WEE1,MIB1,SIAH2,TBK1,PTTG1,STOM,CDC42EP3,CD82,AKT3,ZFYVE28,CHST12,NIBAN1,PLP2,TAGLN2,PLXNC1,SEC11C,TPM4,NOD2,BATF,LRIG1,TUFT1,CBLL1,OPTN,LGALS3,ADAM19,LGALS1,EPHA4,AQP3,ITPK1,RILPL2,EMB,VRK2,CD58,LIMS1,IL2RB,GPR65,TMEM123,NUP62,DCK,C21orf91,ELK3,LPAR6,FUT8,SDF2,TUT7,TRAF5,GIMAP4,CREBL2,PPM1D,SH3BP1,P2RY14,WNT10A,PIKFYVE,INPP5D
effector_cd4	SHMT2,TPI1,RRM1,TNF,TP53INP2,PSMA6,WDHD1,ZFAND5,CSF2,RUVBL2,COX6A1,CDK2,PKM,CTPS1,FABP5,RNF14,TOR1AIP1,S100A16,ZNRD1,STARD4,TRIP12,ROS1,STK16,RAMP1,PSMG2,SEC24D,RBM28,SOX11,PRG3,WARS1,PSRC1,PTPN18,RAP2B,PPP4R2,RNF19A,ZMIZ2,TBC1D4,TSTA3,PRDX4,GET1,PPP2R5A,PSEN1,U2AF1,SF3B4,ZFP36L1,SNAI2,RASD1,TMBIM1,TRAK1,SNRNP40,SPATS2L,SLC41A1,RENBP,PLAGL2,CCRL2,PSMB3,SLC1A5,IMPDH2,EXO1,EIF2S1,ALDOA,MIF,EEF1E1,L…
naive_cd8	ITGAE,NDRG1,HLA-DOA,CNN3,RFLNB,SLC12A7,PLAUR,CD1D,TEC,CCR9,ARMCX2,IGF1R,MAP7,CCR7,SPRED2,MYB,RGCC,IDH2,ADCY6,EPHX1,ST6GAL1,TDRP,RPS6KA2,XPC,IFIT1B,ABCC5,TTC3,IKBKE,C19orf48,AMPD3,IL6ST,GSN,MAP4K3,PDK1,DTX1,TCF7,SELL,ABCG1,PPIC,TMEM50B,HAGH,SESN1,NOTCH1,DALRD3,SMC4,NEDD4L,RAMP1,ZNRF1,ID3,EVL,GABRR2,CXXC5,ACTN1,RALGPS2,CNGA1,PRKD2,SEC11C,RGS10,RERE,APEX1,PBX2,SATB1,NAB2,LAPTM4B,JARID2,NR2C1,FAM102A…
memory_cd8	PGLYRP1,MDFIC,CASP1,ACOT7,S100A6,LGALS1,PRSS12,S100A13,IFNG,PTPN13,RABAC1,POU6F1,CXCR3,KLRK1,FASLG,IL18R1,TRAF1,IFITM10,TDRP,CCND2,GZMM,CCR5,AHNAK,ID2,KCNJ8,CD44,BCL2A1,RFLNB,HSD17B11,AQP9,MAPRE2,FCGR2B,JUN,ANXA2,ERRFI1,RPL14,S100A4,SESN1,VKORC1,AKAP9,NRP1,IL6R,GATA3,S100A10,ACP5,EVL,CRTAM,SNX10,CCL5,DENND5A,CHPT1,IL4R,HLA-A,S100A11,UNC119B,TSR1,PRF1,CCR7,HSD17B8,CCR2,GSTO1,EMP1,NDUFA7,RNF138,MCO…
effector_cd8	LGALS1,CKS1B,RRM1,ANXA2,LITAF,MDFIC,PLSCR1,ATP5IF1,LIG1,YBX3,CCNF,FASLG,CDK1,GABARAPL1,CDCA5,IRF8,UNC119,NCAPH,S100A6,SERPINB9,PRC1,GZMK,PRDX4,KPNA2,GZMB,LGALS3,CDC25C,NDRG1,CDC20,CCR5,ACOT7,TACC3,CCNB2,KIF22,PCLAF,STMN1,IFNG,GZMA,SELENOH,CD9,KIF11,CAPN2,GLRX,CENPA,KLRK1,PRF1,HOPX,REEP5,CMC2,S100A10,CASP3,BCL2A1,SQLE,MAD2L1,CCNA2,TNFRSF9,RNASEH2B,AURKB,GEM,S100A4,RHOQ,GNPDA1,KIF23,TOP2A,DTL,PSMA5…
SUBTYPE_Treg	RHOH,DRC1,GADD45B,VCP,SEC23B,ZPBP2,TNF,WARS1,HLA-DRB1,PPP2R5A,RAMP1,MGST2,JADE3,VRK1,TP53INP2,SPATA2,GET1,EIF2B2,ACSL5,NASP,MRPS12,CXCL10,TCN2,PSMD8,EXT1,MLH1,TNIP1,MKLN1,COPS7A,PTTG1,SIGMAR1,PSMA1,CALU,TRIB1,TDRD7,IGF2R,HTRA2,CAD,UBE2N,PSMA2,TSPAN32,SNF8,RCSD1,SERPINB1,PDXK,LONP1,ICAM1,TRIP4,REXO2,WDFY2,WFS1,IDE,WDR78,SMYD3,HSBP1,DERL1,THY1,DHX30,GPN3,STIM2,SPSB1,TM4SF5,PPM1L,VDAC3,PIK3AP1,ANXA2…
SUBTYPE_Th1	CSF2,SUB1,UCP1,TENT4A,SLC27A1,BST2,CCT2,UGCG,IL21R,PTPRO,CHD7,SGCB,FLOT1,SIPA1L1,TTLL4,SORL1,RIT1,SENP7,PELI1,CTSH,RPE,KCNIP4,AMHR2,CRLF1,CARD6,TAF5L,AGFG1,PTPRCAP,PDCD2L,SMYD3,MEF2D,GCH1,OC90,INAVA,TGM6,BRMS1,DGKE,AIDA,DCPS,C19orf38,NEFH,USP18,OTOS,CENPJ,DONSON,MIB1,BCL2A1,TRIM25,BARX1,PRPF4,ZNF354C,MED7,FOXQ1,PPP1R8,MAP3K7,NUDT9,NSUN4,MYO19,CORO1C,RNF38,BAX,HLA-C,NOC2L,OSMR,SH3BP2,EPSTI1,ADD2,A…
SUBTYPE_Th2	GLB1,DAAM1,ZBTB24,CLCA2,KYAT3,TAZ,GFI1,CCND2,HSPA13,TFG,LPIN2,RELCH,GZF1,ZNF260,MAP3K2,PRKCA,SRSF1,MED7,NMB,MGAT4C,GPM6B,RAP1B,RCL1,LAPTM4A,BCAR3,ZPBP2,HSD17B12,NRIP3,IKZF3,BBS10,CCDC126,FAM20B,KIF3A,PSEN1,ATP6V0E1,C12orf4,DMAC2L,SELENOW,CANX,AFF1,CDCP1,HOMER2,GFPT1,ISY1,FAF2,AKAP7,CAB39,RND3,SLPI,MMRN2,MKRN1,PKD2,WEE1,TARS1,BAG2,GCLM,IMPACT,PTGER2,FADS1,OXSM,CISH,RSAD2,PCYT1A,RNF167,SLC35A1,KRAS…
SUBTYPE_Th17	BSCL2,CHKA,MKRN1,CRLF3,NF2,TBC1D14,UPP1,TIAM1,TMEM26,TCF4,ATP6V0E1,LAMC2,ITGAX,DCTN5,WDFY2,NELFCD,ZNF600,MTMR14,NUPR1,NDUFA12,TBXAS1,NAPSA,UNC93B1,ZMIZ2,GPI,DOHH,GADD45A,PRDX5,OTULINL,HCLS1,INPP5K,ALDH18A1,CDK2AP1,DDX6,CNP,POU2F3,MRPL55,CD83,TXNIP,LY86,XBP1,SETD6,DNMT3L,DDX19B,ZC4H2,CDKAL1,BAMBI,TUBA1A,GNG2,SIM1,SLC6A15,DDT,ELOVL6,ABCA2,THEMIS2,IL12RB2,RNF125,EIF2B2,PPP1R21,PITPNC1,CISD1,CSTB,XXY…
KA_TR_Li	AW549877,Areg,Bcl2a1a,Bcl2a1b,Bcl2a1c,Bcl2a1d,Bcl2l1,Bhlhe40,Bmyc,Btg1,Ccr8,Cd200r1,Cd74,Cd81,Cd83,Ceacam15,Ddx3y,Dennd4a,Dgat2,Dst,Dusp1,Ednrb,Eif2s3y,Fam110a,Fam132a,Fam46a,Fosl2,Gadd45b,Gata3,Gm4858,Gp49a,Gpr65,Hopx,Id2,Ifrd1,Ikzf2,Ikzf4,Il1rl1,Itga4,Itgav,Itgb8,Itm2c,Jun,Junb,Kdm6b,Klrg1,Lilrb4,Ly75,Mmd,Mrps6,Nfkbia,Nfkbid,Nfkbiz,Nr4a1,Nr4a3,Odc1,Pcyt1a,Pdcd1,Penk,Ptplad1,Rbpj,Rel,Relb,Rgs16,…
Tr17_Li	Adam8,Arnt2,Asb2,Ccr1,Cxcr6,F2r,Il12rb1,Il1r1,Ltb4r1,Mmp25,Mmp9,Podnl1,Ptprv,Rnase4,Rorc,Sdc4,Serpinb1a,Socs2,Taok3,Tmem176a,Tmem176b
hippocampus_CA1_ventral	Ccnd2,Efnb2,Pnck,Tiam1,Slc2a3,Rab3b,Etv1,Mtfp1,Ndrg1,Kit,Slc4a3,Hap1,Elavl2,Met,Syn2,Ick,Pea15a,Arnt2,Timp2,Ypel2,Aig1,Rspo3,Ptprk,Slc6a15,Lin7a,Zwint,Dcn,Grb10,Rnf130,Efr3b,Pxdn,L2hgdh,Pfkp,Gcnt2,Sfxn1,Glrx,Mctp1,Emb,Fezf2,Ptprg,Anxa7,Sdc2,Baalc,Oxr1,Shisa9,Alcam,Tagln3,Ncam2,St6gal1,Tuba1b,Fhl1,Agpat4,Ttc39c,Dpysl3,Grp,Gnal,Smad2,Ablim1,Gfra1,Sdc3,Gria4,Idh1,Slc9a2,Slc9a4,Slc16a14,Serpine2,Atp2…
hippocampus_CA1_dorsal	Ckb,Fndc5,Lin7b,Gstm7,Tle1,Cabp7,Etv5,Actn1,Sash1,Lpl,Sertad4,Mpped2,Igfbp4,Kcnab3,Scn1b,Atp2b1,Ptprr,Actr2,Pttg1,Adcy1,Sept4,Nmt1,Ccdc88c,Net1,Iqgap2,Htr1a,Anxa11,Slc39a14,Gfra2,Rb1,Cln5,Cldn10,Cdh10,Asap1,Enpp2,Ppp1r1a,Arc,Igsf11,Rcan1,Nr4a1,Satb1,Tmem178,Syt7,Kcnip2,Zfhx4,Homer2,2010300C02Rik,Sphkap,Lypd1,Chgb,Car2,Kcnab1,Extl2,Olfm3,Kcnq5,Dclk2,Tspan5,Ppp3ca,Epha7,Tmem38b,Hpca,Kcnip4,Slc30a3,…
hippocampus_CA1_distal	Blvra,Ralb,Yeats4,Pttg1,4930447C04Rik,Snapc1,Cartpt,Slc38a2,Mcfd2,Rbfa,Mrpl16,Rpp30,Smndc1,Wdr12,Srp9,Nr4a2,Ndufaf1,Car2,Col11a1,Ndst4,Mrps15,Prkab1,Osbpl3,Dusp4,Mansc1,St18,Mrpl15,Pcdh17,Rnf139,Olfml2b,Lyrm4,Neto1,Atf7,Birc2,Ppih,Crem,Zfp772,Amn1,Ddx3y,Tnfaip8l3,Pcp4
hippocampus_CA1_proximal	Egfl6,Gabra2,Sez6,Smg5,Mef2d,Nfix,Kdelr1,Crtc1,Mef2c,Fance,Hapln4,Scube1,Stard3,Myo1b,Chd3,Cacng2,Eif4ebp2,Nefh,Helz,Fos,Camk2g,Bmp1,Kcnv1,Enpp2,Gpaa1,Arc,Tagln3,Snx4,Smarcd1,Cpne5,Pacs1,Men1,Nab2,Fgf14,Sdc3,Unc5a,Tsc22d2,Nbn,Rragd,Nr4a3,Sparcl1,Creld1,Slc6a1,Plp1,Ido2,Thsd7a,Atxn2l,Resp18,Cplx1,Egr3,Nrxn2,Inpp5j,Sncb,Dhcr24,Dennd1a,Ttyh3,Fxyd7,Anln,Arhgap33,Lrfn3,Ahdc1,Egr2,Zfp384,Pdk2,Ak5,Tgfb2…
hippocampus_CA1_deep	Mid2,Ocrl,Rab3b,Hlf,Sst,Stxbp2,Cnn2,Mef2c,Srm,Sulf2,Fam163b,Myt1,Wnt2,Gabra1,Adam19,Prpsap1,Rnd3,Timp2,Pkib,Nudt4,Phlda1,Id2,Efr3b,Txndc17,Hapln1,Polk,Fezf2,Lats2,Stxbp5l,Dpf2,Coro1b,Erlin1,Fam107b,Rgs5,Gad2,Nr4a2,Uap1l1,Ext2,Tyro3,Zdbf2,Car2,Ppm1l,Col11a1,Ndst4,Polr3gl,Lmo4,Astn2,Elavl4,Epha10,Lzic,Pex10,Plch2,Apbb2,Sparcl1,Eif2b1,St7,Rph3a,Osbpl3,Ptn,Slc6a1,Chrna7,Tgfb1i1,Sh3bgrl,Gabra3,Ikbkb,A…
hippocampus_CA1_superficial	Sema4f,Syn2,Zfp715,Cd34,Gle1,Grm1,Ptprk,Pgam2,Otub2,Htr1a,Slc35f4,Gfra2,Sybu,Kcnv1,Enpp2,Tagln3,Nptx1,Cpeb1,Myo5b,Lct,Ahctf1,Egfl7,Npy2r,Calb1,Lypla2,Slc30a3,Tesc,Camkk2,Wee1,Ophn1,Slit2,Dscaml1,Rsl24d1,Car12,Lgi3,Kcnk1,Faah,Dhcr24,Capn5,Lmo1,Npy1r,March1,Fxyd7,Anln,Satb2,Cnst,Ak5,Abhd14a,Fgf11,Shroom2,Penk,Golph3l,Zfp518b,Prmt1,Syt17,Dcc
ctrl_vs_case_96hPH	CD36,MYO9A,SMOC2,YBEY,EID1,GLDN,ZEB2,LUM,RGS5,POU2F2,SOX4,FAM124A,ACOT2,COL1A2,OSBPL3,LTBP2,OLIG1,CD63,COL1A1,RASL10B,CDK14,REN,GPNMB,THBS1,PSAT1,SYT12,RAC2,VSIG4,APP,CLCN5,TMEM176A,RHOQ,ITGB2,PKN3,MARCO,SOX4,FYB1,IQGAP1,CRYBG3,ADAM11,UNC119,PCOLCE2,CFP,LGALS1,NOL3,HS3ST4,SCAMP5,SPC24,PMEPA1,C6,ZNF704,UAP1L1,ITPRIPL2,TES,SDK1,MAP3K8,CYBB,GPX3,NCAM1,ISYNA1,CSRP1,CALU,CRIM1,LPL,RBBP8,AP1S2,SLC6A8,C…
case_vs_ctrl_96hPH	POR,DBP,CXCL2,SLC46A3,COQ10B,CYP21A2,CYP3A7,ALDH1B1,AK2,IGFBP5,SDS,SCD,PPIF,GPCPD1,FMO2,SORD,THRSP,EEF2K,NNMT,ASS1,GNAT1,EEF2K,SAA2-SAA4,GYS2,CTH,CUX2,PCSK4,ITIH4,CYP7A1,BCL3,SLC1A2,MAFB,ZBP1,IGFBP1,RORC,IRF7,GADD45G,OAT,UROC1,PSMB8,HMGCR,INMT,APCS,PRSS35,PSMB9,MID1IP1,PAPSS2,GLT1D1,DPYD,BMF,GBP4,GOT1,SLC25A25,PDK2,SERPINA6,CA3,LRTM1,SFTPA1,PCK1,AKR1D1,ACAA1,LDLR,SLC47A1,USP18,SLC2A9,VEGFA,IFITM2…
case_prePH_vs_96hPH	CD36,MYO9A,SMOC2,YBEY,GLDN,LUM,POU2F2,COL1A2,OSBPL3,OLIG1,CD63,COL1A1,RASL10B,REN,GPNMB,F13A1,THBS1,RPL12,PSAT1,GM2A,SYT12,RAC2,VSIG4,TMEM176A,ITGB2,ROCK2,ATF3,MARCO,FYB1,IQGAP1,ADAM11,MAN2A1,AHNAK,PCOLCE2,CFP,LGALS1,SETD7,FKBP11,NOL3,HS3ST4,SCAMP5,SSR3,SOAT1,SPC24,PMEPA1,C6,UAP1L1,AIF1,TES,SDK1,MAP3K8,CYBB,GPX3,NCAM1,ISYNA1,CLEC4C,CSRP1,CRTAP,CALU,MEFV,GALNT7,CRIM1,LPL,RBBP8,SLC6A8,CD44,SPC25,SL…
case_96hPH_vs_prePH	TXNIP,EGR1,WNT16,NAV2,RNF170,TRIB3,FITM1,TBCEL,CPEB4,ALAS2,DTX4,G0S2,IRS2,RNF152,GAS6,FBLIM1,OXSM,TPPP,CBX1,RNF186,ACOT4,FGFRL1,KIF3A,KLF10,CIB2,ACOT1,TIMM22,ABCD2,GADD45A,CCDC36,SLC39A2,EFNA1,ME1,FBXL20,FAHD1,DYRK1B,PNPLA8,UBE2R2,TAOK3,PPP2R3A,ARRDC3,NR1D1,IGF2BP3,PPP1R3G,ZC3H6,TXNL4B,SULT1B1,HHAT,NR1I3,BBC3,HBE1,LSM10,POLR3G,MAPK15,TSC1,PCTP,TBX3,SCD,MADD,SGMS2,PGRMC1,KIAA0319,PHF1,PLXNA2,NCKAP…
large_vs_small	A1BG,HAO2,CYP8B1,CDX4,KCNK10,RFX4,SYT3,CA3,CSAD,SLC27A1,LRIT2,PHOSPHO1,LRIT1,RGS16,SRGAP3,ATAT1,CHAC1,FAM89A,LEAP2,CHRNB3,TNFRSF13C,ACPP,SLC30A10,CA1,CSRP3,DERL3,PEX10,SLC22A4,TLE2,TM7SF2,MVD,WDR93,DLGAP1,AQP8,MACROD1,ELOVL3,SERPINA12,CYP7B1,CBX7,FMO3,SLCO1A2,CYP46A1,FDPS,INCA1,BIK,GRIK5,TP53I13,HSD17B6,HSD11B1,CYP2E1,GAS1,UPRT,CYP17A1,PON1,TXNRD3,AVPR1A,ENHO,NAT8,HSD3B7,PRSS36,SCO2,PSMB6,SLC10A1…
hep4n_richter	AKR1C4,SLCO1B3,CYP2E1,HSD3B7,RNASE4,CYP27A1,LIFR,AOX1,ANG,CD1D,DLEC1,CDO1,NR1I3,PID1,CDH2,SMARCA2,TOMM40L,ABCC2,UBE2E2,ATP11C,PRLR,SLC25A21,GSTA3,DOCK4,RGN,TPK1,UGT1A1,AQP9,ACSM5,ACSM1,MLXIPL,PON1,MTUS1,HIBADH,UGT1A3,SLC19A2,ACSL1,F2,ONECUT2,IMMP2L,LAMP2,USP47,UGT1A4,DNAJC12,COBLL1,POR,AGXT2,RBMS1,SNTB1,GUCD1,EIF4A2,CHKA,SORD,TBCE,LIN7A,CYB5A,PAPSS2,CA3,CPSF6,PLPP3,RNF43,LEAP2,FCHO2,IL1R1,GCGR,HP…	hep4n_richter	AKR1C4,SLCO1B3,CYP2E1,HSD3B7,RNASE4,CYP27A1,LIFR,AOX1,ANG,CD1D,DLEC1,CDO1,NR1I3,PID1,CDH2,SMARCA2,TOMM40L,ABCC2,UBE2E2,ATP11C,PRLR,SLC25A21,GSTA3,DOCK4,RGN,TPK1,UGT1A1,AQP9,ACSM5,ACSM1,MLXIPL,PON1,MTUS1,HIBADH,UGT1A3,SLC19A2,ACSL1,F2,ONECUT2,IMMP2L,LAMP2,USP47,UGT1A4,DNAJC12,COBLL1,POR,AGXT2,RBMS1,SNTB1,GUCD1,EIF4A2,CHKA,SORD,TBCE,LIN7A,CYB5A,PAPSS2,CA3,CPSF6,PLPP3,RNF43,LEAP2,FCHO2,IL1R1,GCGR,HP…	hep4n_richter	AKR1C4,SLCO1B3,CYP2E1,HSD3B7,RNASE4,CYP27A1,LIFR,AOX1,ANG,CD1D,DLEC1,CDO1,NR1I3,PID1,CDH2,SMARCA2,TOMM40L,ABCC2,UBE2E2,ATP11C,PRLR,SLC25A21,GSTA3,DOCK4,RGN,TPK1,UGT1A1,AQP9,ACSM5,ACSM1,MLXIPL,PON1,MTUS1,HIBADH,UGT1A3,SLC19A2,ACSL1,F2,ONECUT2,IMMP2L,LAMP2,USP47,UGT1A4,DNAJC12,COBLL1,POR,AGXT2,RBMS1,SNTB1,GUCD1,EIF4A2,CHKA,SORD,TBCE,LIN7A,CYB5A,PAPSS2,CA3,CPSF6,PLPP3,RNF43,LEAP2,FCHO2,IL1R1,GCGR,HP…	hep4n_richter	AKR1C4,SLCO1B3,CYP2E1,HSD3B7,RNASE4,CYP27A1,LIFR,AOX1,ANG,CD1D,DLEC1,CDO1,NR1I3,PID1,CDH2,SMARCA2,TOMM40L,ABCC2,UBE2E2,ATP11C,PRLR,SLC25A21,GSTA3,DOCK4,RGN,TPK1,UGT1A1,AQP9,ACSM5,ACSM1,MLXIPL,PON1,MTUS1,HIBADH,UGT1A3,SLC19A2,ACSL1,F2,ONECUT2,IMMP2L,LAMP2,USP47,UGT1A4,DNAJC12,COBLL1,POR,AGXT2,RBMS1,SNTB1,GUCD1,EIF4A2,CHKA,SORD,TBCE,LIN7A,CYB5A,PAPSS2,CA3,CPSF6,PLPP3,RNF43,LEAP2,FCHO2,IL1R1,GCGR,HP…	hep4n_richter	AKR1C4,SLCO1B3,CYP2E1,HSD3B7,RNASE4,CYP27A1,LIFR,AOX1,ANG,CD1D,DLEC1,CDO1,NR1I3,PID1,CDH2,SMARCA2,TOMM40L,ABCC2,UBE2E2,ATP11C,PRLR,SLC25A21,GSTA3,DOCK4,RGN,TPK1,UGT1A1,AQP9,ACSM5,ACSM1,MLXIPL,PON1,MTUS1,HIBADH,UGT1A3,SLC19A2,ACSL1,F2,ONECUT2,IMMP2L,LAMP2,USP47,UGT1A4,DNAJC12,COBLL1,POR,AGXT2,RBMS1,SNTB1,GUCD1,EIF4A2,CHKA,SORD,TBCE,LIN7A,CYB5A,PAPSS2,CA3,CPSF6,PLPP3,RNF43,LEAP2,FCHO2,IL1R1,GCGR,HP…	hep4n_richter	AKR1C4,SLCO1B3,CYP2E1,HSD3B7,RNASE4,CYP27A1,LIFR,AOX1,ANG,CD1D,DLEC1,CDO1,NR1I3,PID1,CDH2,SMARCA2,TOMM40L,ABCC2,UBE2E2,ATP11C,PRLR,SLC25A21,GSTA3,DOCK4,RGN,TPK1,UGT1A1,AQP9,ACSM5,ACSM1,MLXIPL,PON1,MTUS1,HIBADH,UGT1A3,SLC19A2,ACSL1,F2,ONECUT2,IMMP2L,LAMP2,USP47,UGT1A4,DNAJC12,COBLL1,POR,AGXT2,RBMS1,SNTB1,GUCD1,EIF4A2,CHKA,SORD,TBCE,LIN7A,CYB5A,PAPSS2,CA3,CPSF6,PLPP3,RNF43,LEAP2,FCHO2,IL1R1,GCGR,HP…	hep4n_richter	AKR1C4,SLCO1B3,CYP2E1,HSD3B7,RNASE4,CYP27A1,LIFR,AOX1,ANG,CD1D,DLEC1,CDO1,NR1I3,PID1,CDH2,SMARCA2,TOMM40L,ABCC2,UBE2E2,ATP11C,PRLR,SLC25A21,GSTA3,DOCK4,RGN,TPK1,UGT1A1,AQP9,ACSM5,ACSM1,MLXIPL,PON1,MTUS1,HIBADH,UGT1A3,SLC19A2,ACSL1,F2,ONECUT2,IMMP2L,LAMP2,USP47,UGT1A4,DNAJC12,COBLL1,POR,AGXT2,RBMS1,SNTB1,GUCD1,EIF4A2,CHKA,SORD,TBCE,LIN7A,CYB5A,PAPSS2,CA3,CPSF6,PLPP3,RNF43,LEAP2,FCHO2,IL1R1,GCGR,HP…	hep4n_richter	AKR1C4,SLCO1B3,CYP2E1,HSD3B7,RNASE4,CYP27A1,LIFR,AOX1,ANG,CD1D,DLEC1,CDO1,NR1I3,PID1,CDH2,SMARCA2,TOMM40L,ABCC2,UBE2E2,ATP11C,PRLR,SLC25A21,GSTA3,DOCK4,RGN,TPK1,UGT1A1,AQP9,ACSM5,ACSM1,MLXIPL,PON1,MTUS1,HIBADH,UGT1A3,SLC19A2,ACSL1,F2,ONECUT2,IMMP2L,LAMP2,USP47,UGT1A4,DNAJC12,COBLL1,POR,AGXT2,RBMS1,SNTB1,GUCD1,EIF4A2,CHKA,SORD,TBCE,LIN7A,CYB5A,PAPSS2,CA3,CPSF6,PLPP3,RNF43,LEAP2,FCHO2,IL1R1,GCGR,HP…	hep4n_richter	AKR1C4,SLCO1B3,CYP2E1,HSD3B7,RNASE4,CYP27A1,LIFR,AOX1,ANG,CD1D,DLEC1,CDO1,NR1I3,PID1,CDH2,SMARCA2,TOMM40L,ABCC2,UBE2E2,ATP11C,PRLR,SLC25A21,GSTA3,DOCK4,RGN,TPK1,UGT1A1,AQP9,ACSM5,ACSM1,MLXIPL,PON1,MTUS1,HIBADH,UGT1A3,SLC19A2,ACSL1,F2,ONECUT2,IMMP2L,LAMP2,USP47,UGT1A4,DNAJC12,COBLL1,POR,AGXT2,RBMS1,SNTB1,GUCD1,EIF4A2,CHKA,SORD,TBCE,LIN7A,CYB5A,PAPSS2,CA3,CPSF6,PLPP3,RNF43,LEAP2,FCHO2,IL1R1,GCGR,HP…	hep4n_richter	AKR1C4,SLCO1B3,CYP2E1,HSD3B7,RNASE4,CYP27A1,LIFR,AOX1,ANG,CD1D,DLEC1,CDO1,NR1I3,PID1,CDH2,SMARCA2,TOMM40L,ABCC2,UBE2E2,ATP11C,PRLR,SLC25A21,GSTA3,DOCK4,RGN,TPK1,UGT1A1,AQP9,ACSM5,ACSM1,MLXIPL,PON1,MTUS1,HIBADH,UGT1A3,SLC19A2,ACSL1,F2,ONECUT2,IMMP2L,LAMP2,USP47,UGT1A4,DNAJC12,COBLL1,POR,AGXT2,RBMS1,SNTB1,GUCD1,EIF4A2,CHKA,SORD,TBCE,LIN7A,CYB5A,PAPSS2,CA3,CPSF6,PLPP3,RNF43,LEAP2,FCHO2,IL1R1,GCGR,HP…	hep4n_richter	AKR1C4,SLCO1B3,CYP2E1,HSD3B7,RNASE4,CYP27A1,LIFR,AOX1,ANG,CD1D,DLEC1,CDO1,NR1I3,PID1,CDH2,SMARCA2,TOMM40L,ABCC2,UBE2E2,ATP11C,PRLR,SLC25A21,GSTA3,DOCK4,RGN,TPK1,UGT1A1,AQP9,ACSM5,ACSM1,MLXIPL,PON1,MTUS1,HIBADH,UGT1A3,SLC19A2,ACSL1,F2,ONECUT2,IMMP2L,LAMP2,USP47,UGT1A4,DNAJC12,COBLL1,POR,AGXT2,RBMS1,SNTB1,GUCD1,EIF4A2,CHKA,SORD,TBCE,LIN7A,CYB5A,PAPSS2,CA3,CPSF6,PLPP3,RNF43,LEAP2,FCHO2,IL1R1,GCGR,HP…	hep4n_richter	AKR1C4,SLCO1B3,CYP2E1,HSD3B7,RNASE4,CYP27A1,LIFR,AOX1,ANG,CD1D,DLEC1,CDO1,NR1I3,PID1,CDH2,SMARCA2,TOMM40L,ABCC2,UBE2E2,ATP11C,PRLR,SLC25A21,GSTA3,DOCK4,RGN,TPK1,UGT1A1,AQP9,ACSM5,ACSM1,MLXIPL,PON1,MTUS1,HIBADH,UGT1A3,SLC19A2,ACSL1,F2,ONECUT2,IMMP2L,LAMP2,USP47,UGT1A4,DNAJC12,COBLL1,POR,AGXT2,RBMS1,SNTB1,GUCD1,EIF4A2,CHKA,SORD,TBCE,LIN7A,CYB5A,PAPSS2,CA3,CPSF6,PLPP3,RNF43,LEAP2,FCHO2,IL1R1,GCGR,HP…	hep4n_richter	AKR1C4,SLCO1B3,CYP2E1,HSD3B7,RNASE4,CYP27A1,LIFR,AOX1,ANG,CD1D,DLEC1,CDO1,NR1I3,PID1,CDH2,SMARCA2,TOMM40L,ABCC2,UBE2E2,ATP11C,PRLR,SLC25A21,GSTA3,DOCK4,RGN,TPK1,UGT1A1,AQP9,ACSM5,ACSM1,MLXIPL,PON1,MTUS1,HIBADH,UGT1A3,SLC19A2,ACSL1,F2,ONECUT2,IMMP2L,LAMP2,USP47,UGT1A4,DNAJC12,COBLL1,POR,AGXT2,RBMS1,SNTB1,GUCD1,EIF4A2,CHKA,SORD,TBCE,LIN7A,CYB5A,PAPSS2,CA3,CPSF6,PLPP3,RNF43,LEAP2,FCHO2,IL1R1,GCGR,HP…	hep4n_richter	AKR1C4,SLCO1B3,CYP2E1,HSD3B7,RNASE4,CYP27A1,LIFR,AOX1,ANG,CD1D,DLEC1,CDO1,NR1I3,PID1,CDH2,SMARCA2,TOMM40L,ABCC2,UBE2E2,ATP11C,PRLR,SLC25A21,GSTA3,DOCK4,RGN,TPK1,UGT1A1,AQP9,ACSM5,ACSM1,MLXIPL,PON1,MTUS1,HIBADH,UGT1A3,SLC19A2,ACSL1,F2,ONECUT2,IMMP2L,LAMP2,USP47,UGT1A4,DNAJC12,COBLL1,POR,AGXT2,RBMS1,SNTB1,GUCD1,EIF4A2,CHKA,SORD,TBCE,LIN7A,CYB5A,PAPSS2,CA3,CPSF6,PLPP3,RNF43,LEAP2,FCHO2,IL1R1,GCGR,HP…	hep4n_richter	AKR1C4,SLCO1B3,CYP2E1,HSD3B7,RNASE4,CYP27A1,LIFR,AOX1,ANG,CD1D,DLEC1,CDO1,NR1I3,PID1,CDH2,SMARCA2,TOMM40L,ABCC2,UBE2E2,ATP11C,PRLR,SLC25A21,GSTA3,DOCK4,RGN,TPK1,UGT1A1,AQP9,ACSM5,ACSM1,MLXIPL,PON1,MTUS1,HIBADH,UGT1A3,SLC19A2,ACSL1,F2,ONECUT2,IMMP2L,LAMP2,USP47,UGT1A4,DNAJC12,COBLL1,POR,AGXT2,RBMS1,SNTB1,GUCD1,EIF4A2,CHKA,SORD,TBCE,LIN7A,CYB5A,PAPSS2,CA3,CPSF6,PLPP3,RNF43,LEAP2,FCHO2,IL1R1,GCGR,HP…	hep4n_richter	AKR1C4,SLCO1B3,CYP2E1,HSD3B7,RNASE4,CYP27A1,LIFR,AOX1,ANG,CD1D,DLEC1,CDO1,NR1I3,PID1,CDH2,SMARCA2,TOMM40L,ABCC2,UBE2E2,ATP11C,PRLR,SLC25A21,GSTA3,DOCK4,RGN,TPK1,UGT1A1,AQP9,ACSM5,ACSM1,MLXIPL,PON1,MTUS1,HIBADH,UGT1A3,SLC19A2,ACSL1,F2,ONECUT2,IMMP2L,LAMP2,USP47,UGT1A4,DNAJC12,COBLL1,POR,AGXT2,RBMS1,SNTB1,GUCD1,EIF4A2,CHKA,SORD,TBCE,LIN7A,CYB5A,PAPSS2,CA3,CPSF6,PLPP3,RNF43,LEAP2,FCHO2,IL1R1,GCGR,HP…	hep4n_richter	AKR1C4,SLCO1B3,CYP2E1,HSD3B7,RNASE4,CYP27A1,LIFR,AOX1,ANG,CD1D,DLEC1,CDO1,NR1I3,PID1,CDH2,SMARCA2,TOMM40L,ABCC2,UBE2E2,ATP11C,PRLR,SLC25A21,GSTA3,DOCK4,RGN,TPK1,UGT1A1,AQP9,ACSM5,ACSM1,MLXIPL,PON1,MTUS1,HIBADH,UGT1A3,SLC19A2,ACSL1,F2,ONECUT2,IMMP2L,LAMP2,USP47,UGT1A4,DNAJC12,COBLL1,POR,AGXT2,RBMS1,SNTB1,GUCD1,EIF4A2,CHKA,SORD,TBCE,LIN7A,CYB5A,PAPSS2,CA3,CPSF6,PLPP3,RNF43,LEAP2,FCHO2,IL1R1,GCGR,HP…	hep4n_richter	AKR1C4,SLCO1B3,CYP2E1,HSD3B7,RNASE4,CYP27A1,LIFR,AOX1,ANG,CD1D,DLEC1,CDO1,NR1I3,PID1,CDH2,SMARCA2,TOMM40L,ABCC2,UBE2E2,ATP11C,PRLR,SLC25A21,GSTA3,DOCK4,RGN,TPK1,UGT1A1,AQP9,ACSM5,ACSM1,MLXIPL,PON1,MTUS1,HIBADH,UGT1A3,SLC19A2,ACSL1,F2,ONECUT2,IMMP2L,LAMP2,USP47,UGT1A4,DNAJC12,COBLL1,POR,AGXT2,RBMS1,SNTB1,GUCD1,EIF4A2,CHKA,SORD,TBCE,LIN7A,CYB5A,PAPSS2,CA3,CPSF6,PLPP3,RNF43,LEAP2,FCHO2,IL1R1,GCGR,HP…	hep4n_richter	AKR1C4,SLCO1B3,CYP2E1,HSD3B7,RNASE4,CYP27A1,LIFR,AOX1,ANG,CD1D,DLEC1,CDO1,NR1I3,PID1,CDH2,SMARCA2,TOMM40L,ABCC2,UBE2E2,ATP11C,PRLR,SLC25A21,GSTA3,DOCK4,RGN,TPK1,UGT1A1,AQP9,ACSM5,ACSM1,MLXIPL,PON1,MTUS1,HIBADH,UGT1A3,SLC19A2,ACSL1,F2,ONECUT2,IMMP2L,LAMP2,USP47,UGT1A4,DNAJC12,COBLL1,POR,AGXT2,RBMS1,SNTB1,GUCD1,EIF4A2,CHKA,SORD,TBCE,LIN7A,CYB5A,PAPSS2,CA3,CPSF6,PLPP3,RNF43,LEAP2,FCHO2,IL1R1,GCGR,HP…	hep4n_richter	AKR1C4,SLCO1B3,CYP2E1,HSD3B7,RNASE4,CYP27A1,LIFR,AOX1,ANG,CD1D,DLEC1,CDO1,NR1I3,PID1,CDH2,SMARCA2,TOMM40L,ABCC2,UBE2E2,ATP11C,PRLR,SLC25A21,GSTA3,DOCK4,RGN,TPK1,UGT1A1,AQP9,ACSM5,ACSM1,MLXIPL,PON1,MTUS1,HIBADH,UGT1A3,SLC19A2,ACSL1,F2,ONECUT2,IMMP2L,LAMP2,USP47,UGT1A4,DNAJC12,COBLL1,POR,AGXT2,RBMS1,SNTB1,GUCD1,EIF4A2,CHKA,SORD,TBCE,LIN7A,CYB5A,PAPSS2,CA3,CPSF6,PLPP3,RNF43,LEAP2,FCHO2,IL1R1,GCGR,HP…	hep4n_richter	AKR1C4,SLCO1B3,CYP2E1,HSD3B7,RNASE4,CYP27A1,LIFR,AOX1,ANG,CD1D,DLEC1,CDO1,NR1I3,PID1,CDH2,SMARCA2,TOMM40L,ABCC2,UBE2E2,ATP11C,PRLR,SLC25A21,GSTA3,DOCK4,RGN,TPK1,UGT1A1,AQP9,ACSM5,ACSM1,MLXIPL,PON1,MTUS1,HIBADH,UGT1A3,SLC19A2,ACSL1,F2,ONECUT2,IMMP2L,LAMP2,USP47,UGT1A4,DNAJC12,COBLL1,POR,AGXT2,RBMS1,SNTB1,GUCD1,EIF4A2,CHKA,SORD,TBCE,LIN7A,CYB5A,PAPSS2,CA3,CPSF6,PLPP3,RNF43,LEAP2,FCHO2,IL1R1,GCGR,HP…	hep4n_richter	AKR1C4,SLCO1B3,CYP2E1,HSD3B7,RNASE4,CYP27A1,LIFR,AOX1,ANG,CD1D,DLEC1,CDO1,NR1I3,PID1,CDH2,SMARCA2,TOMM40L,ABCC2,UBE2E2,ATP11C,PRLR,SLC25A21,GSTA3,DOCK4,RGN,TPK1,UGT1A1,AQP9,ACSM5,ACSM1,MLXIPL,PON1,MTUS1,HIBADH,UGT1A3,SLC19A2,ACSL1,F2,ONECUT2,IMMP2L,LAMP2,USP47,UGT1A4,DNAJC12,COBLL1,POR,AGXT2,RBMS1,SNTB1,GUCD1,EIF4A2,CHKA,SORD,TBCE,LIN7A,CYB5A,PAPSS2,CA3,CPSF6,PLPP3,RNF43,LEAP2,FCHO2,IL1R1,GCGR,HP…	hep4n_richter	AKR1C4,SLCO1B3,CYP2E1,HSD3B7,RNASE4,CYP27A1,LIFR,AOX1,ANG,CD1D,DLEC1,CDO1,NR1I3,PID1,CDH2,SMARCA2,TOMM40L,ABCC2,UBE2E2,ATP11C,PRLR,SLC25A21,GSTA3,DOCK4,RGN,TPK1,UGT1A1,AQP9,ACSM5,ACSM1,MLXIPL,PON1,MTUS1,HIBADH,UGT1A3,SLC19A2,ACSL1,F2,ONECUT2,IMMP2L,LAMP2,USP47,UGT1A4,DNAJC12,COBLL1,POR,AGXT2,RBMS1,SNTB1,GUCD1,EIF4A2,CHKA,SORD,TBCE,LIN7A,CYB5A,PAPSS2,CA3,CPSF6,PLPP3,RNF43,LEAP2,FCHO2,IL1R1,GCGR,HP…	hep4n_richter	AKR1C4,SLCO1B3,CYP2E1,HSD3B7,RNASE4,CYP27A1,LIFR,AOX1,ANG,CD1D,DLEC1,CDO1,NR1I3,PID1,CDH2,SMARCA2,TOMM40L,ABCC2,UBE2E2,ATP11C,PRLR,SLC25A21,GSTA3,DOCK4,RGN,TPK1,UGT1A1,AQP9,ACSM5,ACSM1,MLXIPL,PON1,MTUS1,HIBADH,UGT1A3,SLC19A2,ACSL1,F2,ONECUT2,IMMP2L,LAMP2,USP47,UGT1A4,DNAJC12,COBLL1,POR,AGXT2,RBMS1,SNTB1,GUCD1,EIF4A2,CHKA,SORD,TBCE,LIN7A,CYB5A,PAPSS2,CA3,CPSF6,PLPP3,RNF43,LEAP2,FCHO2,IL1R1,GCGR,HP…	hep4n_richter	AKR1C4,SLCO1B3,CYP2E1,HSD3B7,RNASE4,CYP27A1,LIFR,AOX1,ANG,CD1D,DLEC1,CDO1,NR1I3,PID1,CDH2,SMARCA2,TOMM40L,ABCC2,UBE2E2,ATP11C,PRLR,SLC25A21,GSTA3,DOCK4,RGN,TPK1,UGT1A1,AQP9,ACSM5,ACSM1,MLXIPL,PON1,MTUS1,HIBADH,UGT1A3,SLC19A2,ACSL1,F2,ONECUT2,IMMP2L,LAMP2,USP47,UGT1A4,DNAJC12,COBLL1,POR,AGXT2,RBMS1,SNTB1,GUCD1,EIF4A2,CHKA,SORD,TBCE,LIN7A,CYB5A,PAPSS2,CA3,CPSF6,PLPP3,RNF43,LEAP2,FCHO2,IL1R1,GCGR,HP…
hep2n_richter	MORN4,MYRFL,SPIC,NTF3,LZIC,GNAI2,ARHGAP10,LY6G6F,HIP1,LAIR1,CTDSPL,COLEC11,FIGNL1,TMEM232,GALNS,CDC45,STAB1,RBP7,KLF13,GNB1L,INTS5,NGF,SFTPD,GASK1A,MAMDC2,PHACTR2,MYO1H,LTBP4,TFPI,CTCFL,HGF,ASB9,LDB2,BMP7,ADGRF5,GLUL,CD5L,HPCAL1,INPP5D,CIB3,COL1A2,DMPK,GDPD4,LCK,KNTC1,SELE,ANKUB1,PTPRB,MYO1F,ANKRD55,ZNF260,NTN1,NR2C2AP,LAPTM5,OSBP2,C11orf65,DHDDS,IL34,SLC1A2,ROBO4,GTF2H3,KCP,CFAP206,LPL,GOT1L1,FB…	hep2n_richter	MORN4,MYRFL,SPIC,NTF3,LZIC,GNAI2,ARHGAP10,LY6G6F,HIP1,LAIR1,CTDSPL,COLEC11,FIGNL1,TMEM232,GALNS,CDC45,STAB1,RBP7,KLF13,GNB1L,INTS5,NGF,SFTPD,GASK1A,MAMDC2,PHACTR2,MYO1H,LTBP4,TFPI,CTCFL,HGF,ASB9,LDB2,BMP7,ADGRF5,GLUL,CD5L,HPCAL1,INPP5D,CIB3,COL1A2,DMPK,GDPD4,LCK,KNTC1,SELE,ANKUB1,PTPRB,MYO1F,ANKRD55,ZNF260,NTN1,NR2C2AP,LAPTM5,OSBP2,C11orf65,DHDDS,IL34,SLC1A2,ROBO4,GTF2H3,KCP,CFAP206,LPL,GOT1L1,FB…	hep2n_richter	MORN4,MYRFL,SPIC,NTF3,LZIC,GNAI2,ARHGAP10,LY6G6F,HIP1,LAIR1,CTDSPL,COLEC11,FIGNL1,TMEM232,GALNS,CDC45,STAB1,RBP7,KLF13,GNB1L,INTS5,NGF,SFTPD,GASK1A,MAMDC2,PHACTR2,MYO1H,LTBP4,TFPI,CTCFL,HGF,ASB9,LDB2,BMP7,ADGRF5,GLUL,CD5L,HPCAL1,INPP5D,CIB3,COL1A2,DMPK,GDPD4,LCK,KNTC1,SELE,ANKUB1,PTPRB,MYO1F,ANKRD55,ZNF260,NTN1,NR2C2AP,LAPTM5,OSBP2,C11orf65,DHDDS,IL34,SLC1A2,ROBO4,GTF2H3,KCP,CFAP206,LPL,GOT1L1,FB…	hep2n_richter	MORN4,MYRFL,SPIC,NTF3,LZIC,GNAI2,ARHGAP10,LY6G6F,HIP1,LAIR1,CTDSPL,COLEC11,FIGNL1,TMEM232,GALNS,CDC45,STAB1,RBP7,KLF13,GNB1L,INTS5,NGF,SFTPD,GASK1A,MAMDC2,PHACTR2,MYO1H,LTBP4,TFPI,CTCFL,HGF,ASB9,LDB2,BMP7,ADGRF5,GLUL,CD5L,HPCAL1,INPP5D,CIB3,COL1A2,DMPK,GDPD4,LCK,KNTC1,SELE,ANKUB1,PTPRB,MYO1F,ANKRD55,ZNF260,NTN1,NR2C2AP,LAPTM5,OSBP2,C11orf65,DHDDS,IL34,SLC1A2,ROBO4,GTF2H3,KCP,CFAP206,LPL,GOT1L1,FB…	hep2n_richter	MORN4,MYRFL,SPIC,NTF3,LZIC,GNAI2,ARHGAP10,LY6G6F,HIP1,LAIR1,CTDSPL,COLEC11,FIGNL1,TMEM232,GALNS,CDC45,STAB1,RBP7,KLF13,GNB1L,INTS5,NGF,SFTPD,GASK1A,MAMDC2,PHACTR2,MYO1H,LTBP4,TFPI,CTCFL,HGF,ASB9,LDB2,BMP7,ADGRF5,GLUL,CD5L,HPCAL1,INPP5D,CIB3,COL1A2,DMPK,GDPD4,LCK,KNTC1,SELE,ANKUB1,PTPRB,MYO1F,ANKRD55,ZNF260,NTN1,NR2C2AP,LAPTM5,OSBP2,C11orf65,DHDDS,IL34,SLC1A2,ROBO4,GTF2H3,KCP,CFAP206,LPL,GOT1L1,FB…	hep2n_richter	MORN4,MYRFL,SPIC,NTF3,LZIC,GNAI2,ARHGAP10,LY6G6F,HIP1,LAIR1,CTDSPL,COLEC11,FIGNL1,TMEM232,GALNS,CDC45,STAB1,RBP7,KLF13,GNB1L,INTS5,NGF,SFTPD,GASK1A,MAMDC2,PHACTR2,MYO1H,LTBP4,TFPI,CTCFL,HGF,ASB9,LDB2,BMP7,ADGRF5,GLUL,CD5L,HPCAL1,INPP5D,CIB3,COL1A2,DMPK,GDPD4,LCK,KNTC1,SELE,ANKUB1,PTPRB,MYO1F,ANKRD55,ZNF260,NTN1,NR2C2AP,LAPTM5,OSBP2,C11orf65,DHDDS,IL34,SLC1A2,ROBO4,GTF2H3,KCP,CFAP206,LPL,GOT1L1,FB…	hep2n_richter	MORN4,MYRFL,SPIC,NTF3,LZIC,GNAI2,ARHGAP10,LY6G6F,HIP1,LAIR1,CTDSPL,COLEC11,FIGNL1,TMEM232,GALNS,CDC45,STAB1,RBP7,KLF13,GNB1L,INTS5,NGF,SFTPD,GASK1A,MAMDC2,PHACTR2,MYO1H,LTBP4,TFPI,CTCFL,HGF,ASB9,LDB2,BMP7,ADGRF5,GLUL,CD5L,HPCAL1,INPP5D,CIB3,COL1A2,DMPK,GDPD4,LCK,KNTC1,SELE,ANKUB1,PTPRB,MYO1F,ANKRD55,ZNF260,NTN1,NR2C2AP,LAPTM5,OSBP2,C11orf65,DHDDS,IL34,SLC1A2,ROBO4,GTF2H3,KCP,CFAP206,LPL,GOT1L1,FB…	hep2n_richter	MORN4,MYRFL,SPIC,NTF3,LZIC,GNAI2,ARHGAP10,LY6G6F,HIP1,LAIR1,CTDSPL,COLEC11,FIGNL1,TMEM232,GALNS,CDC45,STAB1,RBP7,KLF13,GNB1L,INTS5,NGF,SFTPD,GASK1A,MAMDC2,PHACTR2,MYO1H,LTBP4,TFPI,CTCFL,HGF,ASB9,LDB2,BMP7,ADGRF5,GLUL,CD5L,HPCAL1,INPP5D,CIB3,COL1A2,DMPK,GDPD4,LCK,KNTC1,SELE,ANKUB1,PTPRB,MYO1F,ANKRD55,ZNF260,NTN1,NR2C2AP,LAPTM5,OSBP2,C11orf65,DHDDS,IL34,SLC1A2,ROBO4,GTF2H3,KCP,CFAP206,LPL,GOT1L1,FB…	hep2n_richter	MORN4,MYRFL,SPIC,NTF3,LZIC,GNAI2,ARHGAP10,LY6G6F,HIP1,LAIR1,CTDSPL,COLEC11,FIGNL1,TMEM232,GALNS,CDC45,STAB1,RBP7,KLF13,GNB1L,INTS5,NGF,SFTPD,GASK1A,MAMDC2,PHACTR2,MYO1H,LTBP4,TFPI,CTCFL,HGF,ASB9,LDB2,BMP7,ADGRF5,GLUL,CD5L,HPCAL1,INPP5D,CIB3,COL1A2,DMPK,GDPD4,LCK,KNTC1,SELE,ANKUB1,PTPRB,MYO1F,ANKRD55,ZNF260,NTN1,NR2C2AP,LAPTM5,OSBP2,C11orf65,DHDDS,IL34,SLC1A2,ROBO4,GTF2H3,KCP,CFAP206,LPL,GOT1L1,FB…	hep2n_richter	MORN4,MYRFL,SPIC,NTF3,LZIC,GNAI2,ARHGAP10,LY6G6F,HIP1,LAIR1,CTDSPL,COLEC11,FIGNL1,TMEM232,GALNS,CDC45,STAB1,RBP7,KLF13,GNB1L,INTS5,NGF,SFTPD,GASK1A,MAMDC2,PHACTR2,MYO1H,LTBP4,TFPI,CTCFL,HGF,ASB9,LDB2,BMP7,ADGRF5,GLUL,CD5L,HPCAL1,INPP5D,CIB3,COL1A2,DMPK,GDPD4,LCK,KNTC1,SELE,ANKUB1,PTPRB,MYO1F,ANKRD55,ZNF260,NTN1,NR2C2AP,LAPTM5,OSBP2,C11orf65,DHDDS,IL34,SLC1A2,ROBO4,GTF2H3,KCP,CFAP206,LPL,GOT1L1,FB…	hep2n_richter	MORN4,MYRFL,SPIC,NTF3,LZIC,GNAI2,ARHGAP10,LY6G6F,HIP1,LAIR1,CTDSPL,COLEC11,FIGNL1,TMEM232,GALNS,CDC45,STAB1,RBP7,KLF13,GNB1L,INTS5,NGF,SFTPD,GASK1A,MAMDC2,PHACTR2,MYO1H,LTBP4,TFPI,CTCFL,HGF,ASB9,LDB2,BMP7,ADGRF5,GLUL,CD5L,HPCAL1,INPP5D,CIB3,COL1A2,DMPK,GDPD4,LCK,KNTC1,SELE,ANKUB1,PTPRB,MYO1F,ANKRD55,ZNF260,NTN1,NR2C2AP,LAPTM5,OSBP2,C11orf65,DHDDS,IL34,SLC1A2,ROBO4,GTF2H3,KCP,CFAP206,LPL,GOT1L1,FB…	hep2n_richter	MORN4,MYRFL,SPIC,NTF3,LZIC,GNAI2,ARHGAP10,LY6G6F,HIP1,LAIR1,CTDSPL,COLEC11,FIGNL1,TMEM232,GALNS,CDC45,STAB1,RBP7,KLF13,GNB1L,INTS5,NGF,SFTPD,GASK1A,MAMDC2,PHACTR2,MYO1H,LTBP4,TFPI,CTCFL,HGF,ASB9,LDB2,BMP7,ADGRF5,GLUL,CD5L,HPCAL1,INPP5D,CIB3,COL1A2,DMPK,GDPD4,LCK,KNTC1,SELE,ANKUB1,PTPRB,MYO1F,ANKRD55,ZNF260,NTN1,NR2C2AP,LAPTM5,OSBP2,C11orf65,DHDDS,IL34,SLC1A2,ROBO4,GTF2H3,KCP,CFAP206,LPL,GOT1L1,FB…	hep2n_richter	MORN4,MYRFL,SPIC,NTF3,LZIC,GNAI2,ARHGAP10,LY6G6F,HIP1,LAIR1,CTDSPL,COLEC11,FIGNL1,TMEM232,GALNS,CDC45,STAB1,RBP7,KLF13,GNB1L,INTS5,NGF,SFTPD,GASK1A,MAMDC2,PHACTR2,MYO1H,LTBP4,TFPI,CTCFL,HGF,ASB9,LDB2,BMP7,ADGRF5,GLUL,CD5L,HPCAL1,INPP5D,CIB3,COL1A2,DMPK,GDPD4,LCK,KNTC1,SELE,ANKUB1,PTPRB,MYO1F,ANKRD55,ZNF260,NTN1,NR2C2AP,LAPTM5,OSBP2,C11orf65,DHDDS,IL34,SLC1A2,ROBO4,GTF2H3,KCP,CFAP206,LPL,GOT1L1,FB…	hep2n_richter	MORN4,MYRFL,SPIC,NTF3,LZIC,GNAI2,ARHGAP10,LY6G6F,HIP1,LAIR1,CTDSPL,COLEC11,FIGNL1,TMEM232,GALNS,CDC45,STAB1,RBP7,KLF13,GNB1L,INTS5,NGF,SFTPD,GASK1A,MAMDC2,PHACTR2,MYO1H,LTBP4,TFPI,CTCFL,HGF,ASB9,LDB2,BMP7,ADGRF5,GLUL,CD5L,HPCAL1,INPP5D,CIB3,COL1A2,DMPK,GDPD4,LCK,KNTC1,SELE,ANKUB1,PTPRB,MYO1F,ANKRD55,ZNF260,NTN1,NR2C2AP,LAPTM5,OSBP2,C11orf65,DHDDS,IL34,SLC1A2,ROBO4,GTF2H3,KCP,CFAP206,LPL,GOT1L1,FB…	hep2n_richter	MORN4,MYRFL,SPIC,NTF3,LZIC,GNAI2,ARHGAP10,LY6G6F,HIP1,LAIR1,CTDSPL,COLEC11,FIGNL1,TMEM232,GALNS,CDC45,STAB1,RBP7,KLF13,GNB1L,INTS5,NGF,SFTPD,GASK1A,MAMDC2,PHACTR2,MYO1H,LTBP4,TFPI,CTCFL,HGF,ASB9,LDB2,BMP7,ADGRF5,GLUL,CD5L,HPCAL1,INPP5D,CIB3,COL1A2,DMPK,GDPD4,LCK,KNTC1,SELE,ANKUB1,PTPRB,MYO1F,ANKRD55,ZNF260,NTN1,NR2C2AP,LAPTM5,OSBP2,C11orf65,DHDDS,IL34,SLC1A2,ROBO4,GTF2H3,KCP,CFAP206,LPL,GOT1L1,FB…	hep2n_richter	MORN4,MYRFL,SPIC,NTF3,LZIC,GNAI2,ARHGAP10,LY6G6F,HIP1,LAIR1,CTDSPL,COLEC11,FIGNL1,TMEM232,GALNS,CDC45,STAB1,RBP7,KLF13,GNB1L,INTS5,NGF,SFTPD,GASK1A,MAMDC2,PHACTR2,MYO1H,LTBP4,TFPI,CTCFL,HGF,ASB9,LDB2,BMP7,ADGRF5,GLUL,CD5L,HPCAL1,INPP5D,CIB3,COL1A2,DMPK,GDPD4,LCK,KNTC1,SELE,ANKUB1,PTPRB,MYO1F,ANKRD55,ZNF260,NTN1,NR2C2AP,LAPTM5,OSBP2,C11orf65,DHDDS,IL34,SLC1A2,ROBO4,GTF2H3,KCP,CFAP206,LPL,GOT1L1,FB…	hep2n_richter	MORN4,MYRFL,SPIC,NTF3,LZIC,GNAI2,ARHGAP10,LY6G6F,HIP1,LAIR1,CTDSPL,COLEC11,FIGNL1,TMEM232,GALNS,CDC45,STAB1,RBP7,KLF13,GNB1L,INTS5,NGF,SFTPD,GASK1A,MAMDC2,PHACTR2,MYO1H,LTBP4,TFPI,CTCFL,HGF,ASB9,LDB2,BMP7,ADGRF5,GLUL,CD5L,HPCAL1,INPP5D,CIB3,COL1A2,DMPK,GDPD4,LCK,KNTC1,SELE,ANKUB1,PTPRB,MYO1F,ANKRD55,ZNF260,NTN1,NR2C2AP,LAPTM5,OSBP2,C11orf65,DHDDS,IL34,SLC1A2,ROBO4,GTF2H3,KCP,CFAP206,LPL,GOT1L1,FB…	hep2n_richter	MORN4,MYRFL,SPIC,NTF3,LZIC,GNAI2,ARHGAP10,LY6G6F,HIP1,LAIR1,CTDSPL,COLEC11,FIGNL1,TMEM232,GALNS,CDC45,STAB1,RBP7,KLF13,GNB1L,INTS5,NGF,SFTPD,GASK1A,MAMDC2,PHACTR2,MYO1H,LTBP4,TFPI,CTCFL,HGF,ASB9,LDB2,BMP7,ADGRF5,GLUL,CD5L,HPCAL1,INPP5D,CIB3,COL1A2,DMPK,GDPD4,LCK,KNTC1,SELE,ANKUB1,PTPRB,MYO1F,ANKRD55,ZNF260,NTN1,NR2C2AP,LAPTM5,OSBP2,C11orf65,DHDDS,IL34,SLC1A2,ROBO4,GTF2H3,KCP,CFAP206,LPL,GOT1L1,FB…	hep2n_richter	MORN4,MYRFL,SPIC,NTF3,LZIC,GNAI2,ARHGAP10,LY6G6F,HIP1,LAIR1,CTDSPL,COLEC11,FIGNL1,TMEM232,GALNS,CDC45,STAB1,RBP7,KLF13,GNB1L,INTS5,NGF,SFTPD,GASK1A,MAMDC2,PHACTR2,MYO1H,LTBP4,TFPI,CTCFL,HGF,ASB9,LDB2,BMP7,ADGRF5,GLUL,CD5L,HPCAL1,INPP5D,CIB3,COL1A2,DMPK,GDPD4,LCK,KNTC1,SELE,ANKUB1,PTPRB,MYO1F,ANKRD55,ZNF260,NTN1,NR2C2AP,LAPTM5,OSBP2,C11orf65,DHDDS,IL34,SLC1A2,ROBO4,GTF2H3,KCP,CFAP206,LPL,GOT1L1,FB…	hep2n_richter	MORN4,MYRFL,SPIC,NTF3,LZIC,GNAI2,ARHGAP10,LY6G6F,HIP1,LAIR1,CTDSPL,COLEC11,FIGNL1,TMEM232,GALNS,CDC45,STAB1,RBP7,KLF13,GNB1L,INTS5,NGF,SFTPD,GASK1A,MAMDC2,PHACTR2,MYO1H,LTBP4,TFPI,CTCFL,HGF,ASB9,LDB2,BMP7,ADGRF5,GLUL,CD5L,HPCAL1,INPP5D,CIB3,COL1A2,DMPK,GDPD4,LCK,KNTC1,SELE,ANKUB1,PTPRB,MYO1F,ANKRD55,ZNF260,NTN1,NR2C2AP,LAPTM5,OSBP2,C11orf65,DHDDS,IL34,SLC1A2,ROBO4,GTF2H3,KCP,CFAP206,LPL,GOT1L1,FB…	hep2n_richter	MORN4,MYRFL,SPIC,NTF3,LZIC,GNAI2,ARHGAP10,LY6G6F,HIP1,LAIR1,CTDSPL,COLEC11,FIGNL1,TMEM232,GALNS,CDC45,STAB1,RBP7,KLF13,GNB1L,INTS5,NGF,SFTPD,GASK1A,MAMDC2,PHACTR2,MYO1H,LTBP4,TFPI,CTCFL,HGF,ASB9,LDB2,BMP7,ADGRF5,GLUL,CD5L,HPCAL1,INPP5D,CIB3,COL1A2,DMPK,GDPD4,LCK,KNTC1,SELE,ANKUB1,PTPRB,MYO1F,ANKRD55,ZNF260,NTN1,NR2C2AP,LAPTM5,OSBP2,C11orf65,DHDDS,IL34,SLC1A2,ROBO4,GTF2H3,KCP,CFAP206,LPL,GOT1L1,FB…	hep2n_richter	MORN4,MYRFL,SPIC,NTF3,LZIC,GNAI2,ARHGAP10,LY6G6F,HIP1,LAIR1,CTDSPL,COLEC11,FIGNL1,TMEM232,GALNS,CDC45,STAB1,RBP7,KLF13,GNB1L,INTS5,NGF,SFTPD,GASK1A,MAMDC2,PHACTR2,MYO1H,LTBP4,TFPI,CTCFL,HGF,ASB9,LDB2,BMP7,ADGRF5,GLUL,CD5L,HPCAL1,INPP5D,CIB3,COL1A2,DMPK,GDPD4,LCK,KNTC1,SELE,ANKUB1,PTPRB,MYO1F,ANKRD55,ZNF260,NTN1,NR2C2AP,LAPTM5,OSBP2,C11orf65,DHDDS,IL34,SLC1A2,ROBO4,GTF2H3,KCP,CFAP206,LPL,GOT1L1,FB…	hep2n_richter	MORN4,MYRFL,SPIC,NTF3,LZIC,GNAI2,ARHGAP10,LY6G6F,HIP1,LAIR1,CTDSPL,COLEC11,FIGNL1,TMEM232,GALNS,CDC45,STAB1,RBP7,KLF13,GNB1L,INTS5,NGF,SFTPD,GASK1A,MAMDC2,PHACTR2,MYO1H,LTBP4,TFPI,CTCFL,HGF,ASB9,LDB2,BMP7,ADGRF5,GLUL,CD5L,HPCAL1,INPP5D,CIB3,COL1A2,DMPK,GDPD4,LCK,KNTC1,SELE,ANKUB1,PTPRB,MYO1F,ANKRD55,ZNF260,NTN1,NR2C2AP,LAPTM5,OSBP2,C11orf65,DHDDS,IL34,SLC1A2,ROBO4,GTF2H3,KCP,CFAP206,LPL,GOT1L1,FB…	hep2n_richter	MORN4,MYRFL,SPIC,NTF3,LZIC,GNAI2,ARHGAP10,LY6G6F,HIP1,LAIR1,CTDSPL,COLEC11,FIGNL1,TMEM232,GALNS,CDC45,STAB1,RBP7,KLF13,GNB1L,INTS5,NGF,SFTPD,GASK1A,MAMDC2,PHACTR2,MYO1H,LTBP4,TFPI,CTCFL,HGF,ASB9,LDB2,BMP7,ADGRF5,GLUL,CD5L,HPCAL1,INPP5D,CIB3,COL1A2,DMPK,GDPD4,LCK,KNTC1,SELE,ANKUB1,PTPRB,MYO1F,ANKRD55,ZNF260,NTN1,NR2C2AP,LAPTM5,OSBP2,C11orf65,DHDDS,IL34,SLC1A2,ROBO4,GTF2H3,KCP,CFAP206,LPL,GOT1L1,FB…	hep2n_richter	MORN4,MYRFL,SPIC,NTF3,LZIC,GNAI2,ARHGAP10,LY6G6F,HIP1,LAIR1,CTDSPL,COLEC11,FIGNL1,TMEM232,GALNS,CDC45,STAB1,RBP7,KLF13,GNB1L,INTS5,NGF,SFTPD,GASK1A,MAMDC2,PHACTR2,MYO1H,LTBP4,TFPI,CTCFL,HGF,ASB9,LDB2,BMP7,ADGRF5,GLUL,CD5L,HPCAL1,INPP5D,CIB3,COL1A2,DMPK,GDPD4,LCK,KNTC1,SELE,ANKUB1,PTPRB,MYO1F,ANKRD55,ZNF260,NTN1,NR2C2AP,LAPTM5,OSBP2,C11orf65,DHDDS,IL34,SLC1A2,ROBO4,GTF2H3,KCP,CFAP206,LPL,GOT1L1,FB…
CV	RPS18,SMARCA2,ACOT2,KLF13,PPARA,FERMT2,PSMD4,CHCHD10,RPS24,IFT20,ACOT1,NFIC,HSD17B12,DNAJA1,CSAD,UBXN4,CDO1,ID3,SERPINA6,SORD,MTUS1,BRAP,KIF1B,TNFAIP8L1,EDF1,PON1,INMT,CDC34,DMGDH,SETD1A,RBM39,CA3,GABARAPL1,GSTM5,LRRC58,PEX11A,DUSP3,HINT2,CREG1,CS,RGN,CIB1,HPD,FMO1,ABHD14B,VCP,TMEM205,DCXR,PSMC3,GSTA3,ORMDL3,RPS19,ALDH2,PSMB5,EIF4EBP1,ABCC2,ATF4,ALDH3A2,BOLA1,RPS11,CNPY2,CYP2E1,BSDC1,UBE2H,MKNK2,…
PN	SCD,ST3GAL5,TAT,SDHC,ARG1,LEAP2,CCDC142,CXCL12,TARS1,SLC38A4,C5,CTH,ATP5F1C,RETSAT,AMDHD1,APOC4,HSP90B1,HGFAC,CPN2,CFB,ATP5F1B,FGB,ASS1,PPA1,C8B,SCP2,NDUFB10,C9,TDO2,P4HB,SERPINF1,ITIH4,ID2,ATP5MC3,SLC25A39,UQCRFS1,QSOX1,F10,PCK1,SLC25A5,HACL1,EPHX2,SLC25A15,SDC1,ITIH2,MANF,AGXT,UROC1,SFXN1,FADS1,AHSG,SDHB,ASL,ELOVL5,LSR,AMBP,SERPIND1,COX7B,ALDH1L1,HMGCS2,APOA1,GPI,SERPINC1,IGFALS,PIGR,FGA,G6PC,F…
Glycolysis	NUP160,TPR,NDC1,PFKP,PKM,NUP133,PRKACA,ENO1,NUP37,GCKR,SEH1L,NUP50,AAAS,NUP188,RAE1,PGK1,NUP93,PPP2CB,GPI,PPP2R1A,GAPDHS,GCK,ENO3,NUP88,ALDOC,NUP98,NUP107,GAPDH,TPI1,ENO2,PPP2R5D,GNPDA1,NUP155,PPP2CA,PFKFB4,NUP43,PFKFB2,NUP153,NUP85,NUP214,NUP210,NUP42,ALDOB,PPP2R1B,NUP54,NUP58,PFKL,PRKACB,PKLR,ALDOA,PFKM,RANBP2,NUP205,HK1,SEC13,PFKFB1,ADPGK,HK2,HK3,NUP35,GNPDA2,PGAM2,PRKACG,PGM2L1,PFKFB3,PGK2,PG…
Bile acid production	CYP46A1,SLC27A5,BAAT,CYP7B1,AKR1C4,HSD17B4,SCP2,AKR1D1,ACOX2,HSD3B7,CYP27A1,AMACR,CYP7A1,CYP8B1,CYP39A1,CH25H
Lipogenesis	DGAT2,LPIN2,MOGAT3,GPAM,MOGAT1,LPIN3,LPIN1,MOGAT2,DGAT1,GPAT2,AGMO,GK2,GK,GK3P
Xenobiotic metabolism	CYP1A1,FAH,DCXR,CYP1A2,GSTA3,CYP2J2,CYP27A1,ADH1C,UGDH,ASL,NQO1,ALAS1,GSTM4,CYP2C18,PTS,CYB5A,ACOX2,EPHX1,LCAT,SLC35D1,GSS,FMO3,IDH1,AKR1C3,SLC22A1,GSTO1,ARG1,CDO1,FMO1,ALDH9A1,POR,NDRG2,UPB1,ECH1,PTGES,PDK4,AHCY,COMT,AOX1,CFB,DDAH2,HGFAC,F11,CYP26A1,MCCC2,SERPINA6,GNMT,BLVRB,HACL1,MAOA,KYNU,DHPS,SERPINE1,SLC6A12,GCH1,DHRS7,PAPSS2,ALDH2,HSD11B1,SLC35B1,KARS1,CA2,LPIN2,CAT,CYP2S1,RAP1GAP,FBP1,RBP4…
Beta-oxidation	CPT1A,CPT1C,ACADS,ALDH1B1,ACADSB,ACADL,ALDH2,ACADM,CYP4A11,ACAT2,ACADVL,ACAT1,ACAA2,HADH,HADHB,HADHA,CYP4A22,ADH7,ADH6,ACSL6,ADH1B,ADH1C,ADH4,ECHS1,ADH5,ALDH9A1,ALDH3A2,ACSL5,ADH1A,EHHADH,GCDH,ALDH7A1,ACOX3,ACSL1,ACAA1,CPT2,CPT1B,ACOX1,ECI2,ECI1,ACSL3,ACSL4
Cholesterol biosynthesis	CYP51A1,MSMO1,IDI1,FDFT1,SQLE,SC5D,MVK,HMGCS1,HMGCR,DHCR24,ACAT2,HSD17B7,LBR,EBP,NSDHL,IDI2,TM7SF2,GGPS1,LSS,FDPS,PMVK,MVD,DHCR7,ARV1,PLPP6
Protein secretion	ARCN1,TMED10,COPB2,RAB14,ATP7A,COPB1,LAMP2,EGFR,IGF2R,COPE,PPT1,AP3S1,BET1,CLCN3,AP2S1,CLTC,AP2M1,RER1,KIF1B,ARF1,OCRL,ICA1,MON2,ARFGEF2,TMED2,NAPG,TMX1,PAM,SCAMP1,SH3GL2,RAB2A,COG2,VAMP3,ERGIC3,DOP1A,VAMP4,VPS4B,NAPA,GNAS,STX7,SEC22B,VPS45,STX16,YKT6,SNX2,ARFGEF1,CLTA,CLN5,M6PR,SGMS1,USO1,TSG101,DNM1L,LMAN1,YIPF6,ARFIP1,ANP32E,TSPAN8,DST,SCRN1,SEC31A,VAMP7,SCAMP3,AP2B1,RAB22A,AP3B1,TPD52,ATP6V1H…
Gluconeogenesis	SLC25A13,MDH1,ENO1,SLC25A1,PCK2,PGK1,GPI,GAPDHS,ENO3,SLC25A11,ALDOC,GAPDH,TPI1,ENO2,SLC25A12,GOT1,PCK1,GOT2,FBP2,G6PC,SLC37A2,ALDOB,G6PC3,MDH2,ALDOA,G6PC2,SLC37A1,PGAM2,FBP1,PGK2,PGAM1,PC,SLC25A10,SLC37A4
[truncated: 5,000 more columns]

## Sheet: ST9 Fig. 2A
quantile	scdrs.mean	scdrs.se	vision.mean	vision.se	seurat.mean	seurat.se	vam.mean	vam.se
0.001	0.00105652	4.98359e-05	0.000680695	3.28838e-05	0.000931343	4.46728e-05	0.0001	1e-10
0.00126896	0.00129856	5.5706e-05	0.000888819	4.04917e-05	0.00120704	5.14589e-05	0.0001	1e-10
0.00161026	0.00160911	6.62067e-05	0.00112277	4.74495e-05	0.00154073	6.00123e-05	0.0001	1e-10
0.00204336	0.00201933	7.685e-05	0.00146014	5.42704e-05	0.00196047	6.58386e-05	0.0001	1e-10
0.00259294	0.00256436	9.00985e-05	0.00189254	6.36323e-05	0.00252315	7.56777e-05	0.0001	1e-10
0.00329034	0.0032445	0.0001097	0.00246088	7.71167e-05	0.00321271	8.44733e-05	0.0001	1e-10
0.00417532	0.00410712	0.000130939	0.00315366	8.98151e-05	0.00409675	9.72999e-05	0.0001	1e-10
0.00529832	0.00518274	0.000153867	0.0041123	0.000107278	0.00521117	0.000112083	0.0001	1e-10
0.00672336	0.00654835	0.000178063	0.00531756	0.000119986	0.00677666	0.000133879	0.0001	1e-10
0.00853168	0.00823066	0.000208523	0.00690278	0.000134579	0.00870134	0.000159858	0.0001	1e-10
0.0108264	0.0104527	0.000245564	0.00900727	0.000154645	0.0111297	0.000178892	0.0001	1.2743e-10
0.0137382	0.013223	0.000279977	0.0116209	0.000174704	0.0142088	0.000203104	0.0001	4.59533e-09
0.0174333	0.0168165	0.000326092	0.015006	0.000190831	0.0181472	0.000224368	0.0001	6.31866e-08
0.0221222	0.0213796	0.00038102	0.0194894	0.000212486	0.0231847	0.000253504	0.0001	5.69752e-07
0.0280722	0.0271246	0.000430686	0.0253061	0.000234972	0.029361	0.000282654	0.0001	2.96837e-06
0.0356225	0.0345191	0.000485105	0.0325853	0.000267478	0.0372412	0.00030035	0.000277465	1.46691e-05
0.0452035	0.0438515	0.000551144	0.042118	0.000286769	0.0473488	0.000322871	0.00135686	5.29173e-05
0.0573615	0.0558853	0.000614507	0.05425	0.000299687	0.0599664	0.000323908	0.00491917	0.000134287
0.0727895	0.0711792	0.000680503	0.0698501	0.000310415	0.0756917	0.000345858	0.0141631	0.000281982
0.0923671	0.0904686	0.000756844	0.0898794	0.000290323	0.0954307	0.000353015	0.0336265	0.000487232
0.11721	0.115101	0.000779685	0.115673	0.000268273	0.120769	0.000343579	0.0671007	0.000672106
0.148735	0.146846	0.000798143	0.148777	0.000264705	0.152244	0.000353258	0.117171	0.00084741
0.188739	0.186833	0.000764558	0.190296	0.000316045	0.191315	0.000375001	0.186053	0.000901214
0.239503	0.23766	0.000733895	0.242627	0.000402985	0.241194	0.000418468	0.273393	0.000958075
0.30392	0.30259	0.000647884	0.308984	0.000531268	0.303657	0.000512136	0.376269	0.00100311
0.385662	0.3849	0.000516203	0.392176	0.000587285	0.383267	0.000593376	0.494371	0.000993355
0.48939	0.489871	0.000512214	0.49706	0.000630823	0.48453	0.000700487	0.624932	0.000952928
0.621017	0.622549	0.000673309	0.627327	0.000591517	0.615592	0.000699256	0.762461	0.000934581
0.788046	0.790632	0.000995424	0.790314	0.000270363	0.785862	0.000440587	0.899418	0.000725941
1	0.999914	7.54244e-06	0.999705	2.87939e-05	0.999921	9.64132e-06	1	1.37071e-10

## Sheet: ST11 Fig. 2B
effect_size	scdrs.power.mean	scdrs.power.se	vision.power.mean	vision.power.se	seurat.power.mean	seurat.power.se
1.05	0.00126966	0.000294749	0.00145253	0.000276306	0.000327982	9.03626e-05
1.1	0.0564725	0.0037758	0.0155934	0.00106975	0.00166169	0.00027796
1.15	0.308825	0.00875656	0.067199	0.00277345	0.00605433	0.000609673
1.2	0.5711	0.00926216	0.187903	0.00504764	0.0310166	0.00210593
1.25	0.761607	0.00682226	0.359814	0.00693842	0.112243	0.00459698
1.3	0.868127	0.00475323	0.534968	0.00793712	0.253224	0.00698739
1.35	0.929605	0.0031061	0.679006	0.00793028	0.404242	0.0083988
1.4	0.959222	0.00198023	0.783508	0.00692368	0.547455	0.00861312
1.45	0.975619	0.00138817	0.854972	0.00554126	0.680961	0.00831613
1.5	0.983527	0.00115428	0.903818	0.00431057	0.773647	0.00675788

## Sheet: ST12 Results for TMS FACS
trait	cell-type	prop-sig-cells	ct-assoc-fdr	heterogeneity-fdr
PASS_CD_deLange2017	B_cell	0.014	0.034	2.6e-10
PASS_Celiac	B_cell	0	0.93	0.49
PASS_IBD_deLange2017	B_cell	0.0085	0.02	1.6e-09
PASS_Lupus	B_cell	0.00036	0.02	2.6e-07
PASS_Multiple_sclerosis	B_cell	0.025	0.02	1.4e-09
PASS_Primary_biliary_cirrhosis	B_cell	0.0083	0.02	1.1e-08
PASS_Rheumatoid_Arthritis	B_cell	0.051	0.02	7.9e-11
PASS_UC_deLange2017	B_cell	0.00053	0.19	0.026
UKB_460K.blood_EOSINOPHIL_COUNT	B_cell	0.053	0.02	9.3e-11
UKB_460K.blood_LYMPHOCYTE_COUNT	B_cell	0.061	0.02	5.8e-13
UKB_460K.blood_MEAN_CORPUSCULAR_HEMOGLOBIN	B_cell	0.00018	0.31	0.07
UKB_460K.blood_MONOCYTE_COUNT	B_cell	0.0034	0.8	1.9e-07
UKB_460K.blood_PLATELET_COUNT	B_cell	0.00018	0.21	0.026
UKB_460K.blood_RBC_DISTRIB_WIDTH	B_cell	0	1	0.76
UKB_460K.blood_RED_COUNT	B_cell	0	0.65	0.32
UKB_460K.blood_WHITE_COUNT	B_cell	0.00036	1	0.02
UKB_460K.disease_AID_ALL	B_cell	0.022	0.046	1.7e-11
UKB_460K.disease_ALLERGY_ECZEMA_DIAGNOSED	B_cell	0.014	0.057	3.8e-07
UKB_460K.disease_ASTHMA_DIAGNOSED	B_cell	0.016	0.02	0.039
UKB_460K.disease_HYPOTHYROIDISM_SELF_REP	B_cell	0.044	0.02	5.8e-13
UKB_460K.disease_RESPIRATORY_ENT	B_cell	0.013	0.067	0.075
PASS_ADHD_Demontis2018	B_cell	0	0.79	0.77
PASS_Alzheimers_Jansen2019	B_cell	0	0.66	0.83
PASS_BIP_Stahl2019	B_cell	0.00018	0.88	1
PASS_DrinksPerWeek_Liu2019	B_cell	0	0.85	0.96
PASS_GeneralRiskTolerance_KarlssonLinner2019	B_cell	0	0.96	0.94
PASS_Insomnia_Jansen2019	B_cell	0	1	0.81
PASS_Intelligence_SavageJansen2018	B_cell	0.0023	0.49	0.98
PASS_MDD_Howard2019	B_cell	0.00053	1	0.58
PASS_ReactionTime_Davies2018	B_cell	0	1	0.9
PASS_SWB	B_cell	0.00018	1	0.63
PASS_Schizophrenia_Pardinas2018	B_cell	0.0018	0.78	0.93
PASS_SleepDuration_Dashti2019	B_cell	0.00053	1	0.77
PASS_VerbalNumericReasoning_Davies2018	B_cell	0.0016	0.62	0.91
PASS_Worry_Nagel2018	B_cell	0.00053	1	0.93
UKB_460K.body_BMIz	B_cell	0.002	0.99	0.74
UKB_460K.cov_EDU_COLLEGE	B_cell	0.0046	0.27	0.55
UKB_460K.cov_EDU_YEARS	B_cell	0.0023	0.2	0.84
UKB_460K.cov_SMOKING_STATUS	B_cell	0.00018	0.82	0.92
UKB_460K.mental_NEUROTICISM	B_cell	0.00036	1	0.92
UKB_460K.other_MORNINGPERSON	B_cell	0.00018	0.98	0.12
UKB_460K.repro_NumberChildrenEverBorn_Pooled	B_cell	0.00036	0.83	0.36
PASS_AtrialFibrillation_Nielsen2018	B_cell	0.0012	0.3	0.32
PASS_Coronary_Artery_Disease	B_cell	0	1	0.82
UKB_460K.bp_DIASTOLICadjMEDz	B_cell	0.00018	1	0.2
UKB_460K.bp_SYSTOLICadjMEDz	B_cell	0	1	0.5
UKB_460K.disease_CARDIOVASCULAR	B_cell	0	1	0.25
UKB_460K.disease_HYPERTENSION_DIAGNOSED	B_cell	0	1	0.027
PASS_FastingGlucose_Manning	B_cell	0	1	0.015
UKB_460K.biochemistry_AlanineAminotransferase	B_cell	0.0014	0.59	0.59
UKB_460K.biochemistry_AlkalinePhosphatase	B_cell	0.00018	1	0.22
UKB_460K.biochemistry_Cholesterol	B_cell	0.00036	1	0.15
UKB_460K.biochemistry_Glucose	B_cell	0.00053	1	0.36
UKB_460K.biochemistry_HDLcholesterol	B_cell	0	1	0.62
UKB_460K.biochemistry_HbA1c	B_cell	0.00053	0.96	0.27
UKB_460K.biochemistry_LDLdirect	B_cell	0.00036	1	0.026
UKB_460K.biochemistry_SHBG	B_cell	0	1	0.44
UKB_460K.biochemistry_Testosterone_Male	B_cell	0.00053	0.58	0.36
UKB_460K.biochemistry_TotalBilirubin	B_cell	0	0.84	0.76
UKB_460K.biochemistry_TotalProtein	B_cell	0.002	0.02	8.6e-08
UKB_460K.biochemistry_Triglycerides	B_cell	0.00053	0.96	0.33
PASS_Type_1_Diabetes	B_cell	0	0.084	6.5e-07
PASS_Type_2_Diabetes	B_cell	0	1	0.77
UKB_460K.bmd_HEEL_TSCOREz	B_cell	0.00018	1	0.021
UKB_460K.body_BALDING1	B_cell	0	1	0.17
UKB_460K.body_HEIGHTz	B_cell	0	1	0.33
UKB_460K.body_WHRadjBMIz	B_cell	0.00071	1	0.18
UKB_460K.cancer_BREAST	B_cell	0	1	0.35
UKB_460K.impedance_BASAL_METABOLIC_RATEz	B_cell	0.00053	1	0.56
UKB_460K.lung_FEV1FVCzSMOKE	B_cell	0.00036	1	0.019
UKB_460K.lung_FVCzSMOKE	B_cell	0.00089	1	0.75
UKB_460K.pigment_HAIR	B_cell	0.00018	1	0.48
UKB_460K.repro_MENARCHE_AGE	B_cell	0.00018	1	0.82
UKB_460K.repro_MENOPAUSE_AGE	B_cell	0	0.034	0.026
PASS_CD_deLange2017	Bergmann_glial_cell	0	0.99	0.89
PASS_Celiac	Bergmann_glial_cell	0	1	0.91
PASS_IBD_deLange2017	Bergmann_glial_cell	0	1	1
PASS_Lupus	Bergmann_glial_cell	0	1	0.71
PASS_Multiple_sclerosis	Bergmann_glial_cell	0	1	0.71
PASS_Primary_biliary_cirrhosis	Bergmann_glial_cell	0	1	0.1
PASS_Rheumatoid_Arthritis	Bergmann_glial_cell	0	1	0.68
PASS_UC_deLange2017	Bergmann_glial_cell	0	1	1
UKB_460K.blood_EOSINOPHIL_COUNT	Bergmann_glial_cell	0	1	0.57
UKB_460K.blood_LYMPHOCYTE_COUNT	Bergmann_glial_cell	0	1	0.84
UKB_460K.blood_MEAN_CORPUSCULAR_HEMOGLOBIN	Bergmann_glial_cell	0	1	0.7
UKB_460K.blood_MONOCYTE_COUNT	Bergmann_glial_cell	0	1	0.99
UKB_460K.blood_PLATELET_COUNT	Bergmann_glial_cell	0	0.84	0.48
UKB_460K.blood_RBC_DISTRIB_WIDTH	Bergmann_glial_cell	0	0.2	0.83
UKB_460K.blood_RED_COUNT	Bergmann_glial_cell	0	0.95	0.87
UKB_460K.blood_WHITE_COUNT	Bergmann_glial_cell	0	1	0.9
UKB_460K.disease_AID_ALL	Bergmann_glial_cell	0	0.72	0.11
UKB_460K.disease_ALLERGY_ECZEMA_DIAGNOSED	Bergmann_glial_cell	0	1	0.89
UKB_460K.disease_ASTHMA_DIAGNOSED	Bergmann_glial_cell	0	1	0.89
UKB_460K.disease_HYPOTHYROIDISM_SELF_REP	Bergmann_glial_cell	0	1	0.5
UKB_460K.disease_RESPIRATORY_ENT	Bergmann_glial_cell	0	0.91	0.88
PASS_ADHD_Demontis2018	Bergmann_glial_cell	0	0.057	0.41
PASS_Alzheimers_Jansen2019	Bergmann_glial_cell	0	0.97	0.97
PASS_BIP_Stahl2019	Bergmann_glial_cell	0	0.046	0.17
PASS_DrinksPerWeek_Liu2019	Bergmann_glial_cell	0	0.034	0.4
PASS_GeneralRiskTolerance_KarlssonLinner2019	Bergmann_glial_cell	0.019	0.17	0.89
PASS_Insomnia_Jansen2019	Bergmann_glial_cell	0.019	0.12	0.44
PASS_Intelligence_SavageJansen2018	Bergmann_glial_cell	0.69	0.02	0.68
PASS_MDD_Howard2019	Bergmann_glial_cell	0.5	0.02	0.026
PASS_ReactionTime_Davies2018	Bergmann_glial_cell	0.074	0.02	0.27
PASS_SWB	Bergmann_glial_cell	0.31	0.02	0.19
PASS_Schizophrenia_Pardinas2018	Bergmann_glial_cell	0.33	0.02	0.06
PASS_SleepDuration_Dashti2019	Bergmann_glial_cell	0	0.36	0.026
PASS_VerbalNumericReasoning_Davies2018	Bergmann_glial_cell	0.3	0.034	0.65
PASS_Worry_Nagel2018	Bergmann_glial_cell	0.074	0.034	0.44
UKB_460K.body_BMIz	Bergmann_glial_cell	0.13	0.02	0.57
UKB_460K.cov_EDU_COLLEGE	Bergmann_glial_cell	0.69	0.02	0.2
UKB_460K.cov_EDU_YEARS	Bergmann_glial_cell	0.28	0.02	0.26
UKB_460K.cov_SMOKING_STATUS	Bergmann_glial_cell	0	0.17	0.13
UKB_460K.mental_NEUROTICISM	Bergmann_glial_cell	0.28	0.02	0.2
UKB_460K.other_MORNINGPERSON	Bergmann_glial_cell	0	0.19	0.88
UKB_460K.repro_NumberChildrenEverBorn_Pooled	Bergmann_glial_cell	0.019	0.034	0.88
PASS_AtrialFibrillation_Nielsen2018	Bergmann_glial_cell	0	0.31	0.88
PASS_Coronary_Artery_Disease	Bergmann_glial_cell	0	0.71	0.55
UKB_460K.bp_DIASTOLICadjMEDz	Bergmann_glial_cell	0	1	0.43
UKB_460K.bp_SYSTOLICadjMEDz	Bergmann_glial_cell	0	0.54	0.85
UKB_460K.disease_CARDIOVASCULAR	Bergmann_glial_cell	0	1	0.67
UKB_460K.disease_HYPERTENSION_DIAGNOSED	Bergmann_glial_cell	0	1	0.45
PASS_FastingGlucose_Manning	Bergmann_glial_cell	0	0.43	0.53
UKB_460K.biochemistry_AlanineAminotransferase	Bergmann_glial_cell	0	0.87	0.57
UKB_460K.biochemistry_AlkalinePhosphatase	Bergmann_glial_cell	0	0.72	0.83
UKB_460K.biochemistry_Cholesterol	Bergmann_glial_cell	0	0.91	0.57
UKB_460K.biochemistry_Glucose	Bergmann_glial_cell	0	1	0.76
UKB_460K.biochemistry_HDLcholesterol	Bergmann_glial_cell	0	0.58	0.85
UKB_460K.biochemistry_HbA1c	Bergmann_glial_cell	0	0.19	0.82
UKB_460K.biochemistry_LDLdirect	Bergmann_glial_cell	0	0.79	0.52
UKB_460K.biochemistry_SHBG	Bergmann_glial_cell	0	0.52	0.82
UKB_460K.biochemistry_Testosterone_Male	Bergmann_glial_cell	0	0.55	0.72
UKB_460K.biochemistry_TotalBilirubin	Bergmann_glial_cell	0	1	0.77
UKB_460K.biochemistry_TotalProtein	Bergmann_glial_cell	0	1	0.67
UKB_460K.biochemistry_Triglycerides	Bergmann_glial_cell	0	0.96	0.79
PASS_Type_1_Diabetes	Bergmann_glial_cell	0	0.84	0.89
PASS_Type_2_Diabetes	Bergmann_glial_cell	0	1	0.77
UKB_460K.bmd_HEEL_TSCOREz	Bergmann_glial_cell	0	0.79	0.32
UKB_460K.body_BALDING1	Bergmann_glial_cell	0	0.71	0.31
UKB_460K.body_HEIGHTz	Bergmann_glial_cell	0	1	0.67
UKB_460K.body_WHRadjBMIz	Bergmann_glial_cell	0	0.8	0.95
UKB_460K.cancer_BREAST	Bergmann_glial_cell	0	1	0.78
UKB_460K.impedance_BASAL_METABOLIC_RATEz	Bergmann_glial_cell	0.056	0.046	0.6
UKB_460K.lung_FEV1FVCzSMOKE	Bergmann_glial_cell	0	0.99	0.93
UKB_460K.lung_FVCzSMOKE	Bergmann_glial_cell	0	1	0.64
UKB_460K.pigment_HAIR	Bergmann_glial_cell	0	1	0.96
UKB_460K.repro_MENARCHE_AGE	Bergmann_glial_cell	0	0.8	0.83
UKB_460K.repro_MENOPAUSE_AGE	Bergmann_glial_cell	0	0.97	0.94
PASS_CD_deLange2017	Brush_cell_of_epithelium_proper_of_large_intestine	0	1	0.49
PASS_Celiac	Brush_cell_of_epithelium_proper_of_large_intestine	0	1	0.62
PASS_IBD_deLange2017	Brush_cell_of_epithelium_proper_of_large_intestine	0	1	0.99
PASS_Lupus	Brush_cell_of_epithelium_proper_of_large_intestine	0	0.24	0.21
PASS_Multiple_sclerosis	Brush_cell_of_epithelium_proper_of_large_intestine	0	1	0.79
PASS_Primary_biliary_cirrhosis	Brush_cell_of_epithelium_proper_of_large_intestine	0	0.46	0.38
PASS_Rheumatoid_Arthritis	Brush_cell_of_epithelium_proper_of_large_intestine	0	0.49	0.81
PASS_UC_deLange2017	Brush_cell_of_epithelium_proper_of_large_intestine	0.0057	0.7	1
UKB_460K.blood_EOSINOPHIL_COUNT	Brush_cell_of_epithelium_proper_of_large_intestine	0	1	0.56
UKB_460K.blood_LYMPHOCYTE_COUNT	Brush_cell_of_epithelium_proper_of_large_intestine	0	1	0.51
UKB_460K.blood_MEAN_CORPUSCULAR_HEMOGLOBIN	Brush_cell_of_epithelium_proper_of_large_intestine	0	0.32	0.67
UKB_460K.blood_MONOCYTE_COUNT	Brush_cell_of_epithelium_proper_of_large_intestine	0	1	0.67
UKB_460K.blood_PLATELET_COUNT	Brush_cell_of_epithelium_proper_of_large_intestine	0	0.32	0.26
UKB_460K.blood_RBC_DISTRIB_WIDTH	Brush_cell_of_epithelium_proper_of_large_intestine	0	0.16	0.25
UKB_460K.blood_RED_COUNT	Brush_cell_of_epithelium_proper_of_large_intestine	0	0.5	0.74
UKB_460K.blood_WHITE_COUNT	Brush_cell_of_epithelium_proper_of_large_intestine	0	1	0.98
UKB_460K.disease_AID_ALL	Brush_cell_of_epithelium_proper_of_large_intestine	0.0057	0.52	0.17
UKB_460K.disease_ALLERGY_ECZEMA_DIAGNOSED	Brush_cell_of_epithelium_proper_of_large_intestine	0	0.71	0.22
UKB_460K.disease_ASTHMA_DIAGNOSED	Brush_cell_of_epithelium_proper_of_large_intestine	0	1	0.72
UKB_460K.disease_HYPOTHYROIDISM_SELF_REP	Brush_cell_of_epithelium_proper_of_large_intestine	0	0.82	0.13
UKB_460K.disease_RESPIRATORY_ENT	Brush_cell_of_epithelium_proper_of_large_intestine	0	1	0.65
PASS_ADHD_Demontis2018	Brush_cell_of_epithelium_proper_of_large_intestine	0	0.81	0.86
PASS_Alzheimers_Jansen2019	Brush_cell_of_epithelium_proper_of_large_intestine	0	1	0.67
PASS_BIP_Stahl2019	Brush_cell_of_epithelium_proper_of_large_intestine	0	1	0.93
PASS_DrinksPerWeek_Liu2019	Brush_cell_of_epithelium_proper_of_large_intestine	0	0.91	0.82
PASS_GeneralRiskTolerance_KarlssonLinner2019	Brush_cell_of_epithelium_proper_of_large_intestine	0	1	0.3
PASS_Insomnia_Jansen2019	Brush_cell_of_epithelium_proper_of_large_intestine	0	0.91	0.58
PASS_Intelligence_SavageJansen2018	Brush_cell_of_epithelium_proper_of_large_intestine	0	0.71	0.32
PASS_MDD_Howard2019	Brush_cell_of_epithelium_proper_of_large_intestine	0	1	0.05
PASS_ReactionTime_Davies2018	Brush_cell_of_epithelium_proper_of_large_intestine	0	0.82	0.98
PASS_SWB	Brush_cell_of_epithelium_proper_of_large_intestine	0.0057	1	0.67
PASS_Schizophrenia_Pardinas2018	Brush_cell_of_epithelium_proper_of_large_intestine	0	0.95	0.25
PASS_SleepDuration_Dashti2019	Brush_cell_of_epithelium_proper_of_large_intestine	0	1	0.3
PASS_VerbalNumericReasoning_Davies2018	Brush_cell_of_epithelium_proper_of_large_intestine	0	0.91	0.64
PASS_Worry_Nagel2018	Brush_cell_of_epithelium_proper_of_large_intestine	0	0.91	0.11
UKB_460K.body_BMIz	Brush_cell_of_epithelium_proper_of_large_intestine	0	0.73	0.23
UKB_460K.cov_EDU_COLLEGE	Brush_cell_of_epithelium_proper_of_large_intestine	0	0.45	0.74
UKB_460K.cov_EDU_YEARS	Brush_cell_of_epithelium_proper_of_large_intestine	0.0057	0.12	0.39
UKB_460K.cov_SMOKING_STATUS	Brush_cell_of_epithelium_proper_of_large_intestine	0	0.95	0.53
UKB_460K.mental_NEUROTICISM	Brush_cell_of_epithelium_proper_of_large_intestine	0	1	0.05
UKB_460K.other_MORNINGPERSON	Brush_cell_of_epithelium_proper_of_large_intestine	0	0.55	0.3
UKB_460K.repro_NumberChildrenEverBorn_Pooled	Brush_cell_of_epithelium_proper_of_large_intestine	0	1	0.37
PASS_AtrialFibrillation_Nielsen2018	Brush_cell_of_epithelium_proper_of_large_intestine	0	0.97	0.73
PASS_Coronary_Artery_Disease	Brush_cell_of_epithelium_proper_of_large_intestine	0	0.79	0.97
UKB_460K.bp_DIASTOLICadjMEDz	Brush_cell_of_epithelium_proper_of_large_intestine	0	0.44	0.24
UKB_460K.bp_SYSTOLICadjMEDz	Brush_cell_of_epithelium_proper_of_large_intestine	0	0.91	0.48
UKB_460K.disease_CARDIOVASCULAR	Brush_cell_of_epithelium_proper_of_large_intestine	0	0.38	0.48
UKB_460K.disease_HYPERTENSION_DIAGNOSED	Brush_cell_of_epithelium_proper_of_large_intestine	0	0.69	0.85
PASS_FastingGlucose_Manning	Brush_cell_of_epithelium_proper_of_large_intestine	0.0057	0.73	0.06
UKB_460K.biochemistry_AlanineAminotransferase	Brush_cell_of_epithelium_proper_of_large_intestine	0.0057	0.42	0.57
UKB_460K.biochemistry_AlkalinePhosphatase	Brush_cell_of_epithelium_proper_of_large_intestine	0.017	0.093	0.28
UKB_460K.biochemistry_Cholesterol	Brush_cell_of_epithelium_proper_of_large_intestine	0	0.83	0.6
UKB_460K.biochemistry_Glucose	Brush_cell_of_epithelium_proper_of_large_intestine	0	0.63	0.46
UKB_460K.biochemistry_HDLcholesterol	Brush_cell_of_epithelium_proper_of_large_intestine	0	0.93	0.97
UKB_460K.biochemistry_HbA1c	Brush_cell_of_epithelium_proper_of_large_intestine	0	0.51	0.27
UKB_460K.biochemistry_LDLdirect	Brush_cell_of_epithelium_proper_of_large_intestine	0	0.91	0.77
UKB_460K.biochemistry_SHBG	Brush_cell_of_epithelium_proper_of_large_intestine	0	0.56	0.81
UKB_460K.biochemistry_Testosterone_Male	Brush_cell_of_epithelium_proper_of_large_intestine	0	1	0.88
UKB_460K.biochemistry_TotalBilirubin	Brush_cell_of_epithelium_proper_of_large_intestine	0	0.2	0.32
UKB_460K.biochemistry_TotalProtein	Brush_cell_of_epithelium_proper_of_large_intestine	0	0.91	0.57
UKB_460K.biochemistry_Triglycerides	Brush_cell_of_epithelium_proper_of_large_intestine	0	1	0.73
PASS_Type_1_Diabetes	Brush_cell_of_epithelium_proper_of_large_intestine	0	1	0.96
PASS_Type_2_Diabetes	Brush_cell_of_epithelium_proper_of_large_intestine	0	0.59	0.8
UKB_460K.bmd_HEEL_TSCOREz	Brush_cell_of_epithelium_proper_of_large_intestine	0.0057	0.7	0.65
UKB_460K.body_BALDING1	Brush_cell_of_epithelium_proper_of_large_intestine	0	0.81	0.21
UKB_460K.body_HEIGHTz	Brush_cell_of_epithelium_proper_of_large_intestine	0	1	0.66
UKB_460K.body_WHRadjBMIz	Brush_cell_of_epithelium_proper_of_large_intestine	0	1	0.52
UKB_460K.cancer_BREAST	Brush_cell_of_epithelium_proper_of_large_intestine	0	0.96	0.37
UKB_460K.impedance_BASAL_METABOLIC_RATEz	Brush_cell_of_epithelium_proper_of_large_intestine	0	1	0.77
UKB_460K.lung_FEV1FVCzSMOKE	Brush_cell_of_epithelium_proper_of_large_intestine	0	1	0.11
UKB_460K.lung_FVCzSMOKE	Brush_cell_of_epithelium_proper_of_large_intestine	0	0.93	0.36
UKB_460K.pigment_HAIR	Brush_cell_of_epithelium_proper_of_large_intestine	0	0.94	0.68
UKB_460K.repro_MENARCHE_AGE	Brush_cell_of_epithelium_proper_of_large_intestine	0	0.24	0.62
UKB_460K.repro_MENOPAUSE_AGE	Brush_cell_of_epithelium_proper_of_large_intestine	0	0.71	0.74
PASS_CD_deLange2017	CD4-positive_alpha-beta_T_cell	0.069	0.02	0.0024
PASS_Celiac	CD4-positive_alpha-beta_T_cell	0.00085	0.02	0.001
PASS_IBD_deLange2017	CD4-positive_alpha-beta_T_cell	0.11	0.02	0.0031
PASS_Lupus	CD4-positive_alpha-beta_T_cell	0	0.02	0.1
PASS_Multiple_sclerosis	CD4-positive_alpha-beta_T_cell	0.085	0.02	9.3e-05
PASS_Primary_biliary_cirrhosis	CD4-positive_alpha-beta_T_cell	0.0026	0.057	0.026
PASS_Rheumatoid_Arthritis	CD4-positive_alpha-beta_T_cell	0.21	0.02	0.0006
PASS_UC_deLange2017	CD4-positive_alpha-beta_T_cell	0.015	0.02	0.06
UKB_460K.blood_EOSINOPHIL_COUNT	CD4-positive_alpha-beta_T_cell	0.31	0.02	2.1e-06
UKB_460K.blood_LYMPHOCYTE_COUNT	CD4-positive_alpha-beta_T_cell	0.094	0.02	0.00028
UKB_460K.blood_MEAN_CORPUSCULAR_HEMOGLOBIN	CD4-positive_alpha-beta_T_cell	0	0.67	0.32
UKB_460K.blood_MONOCYTE_COUNT	CD4-positive_alpha-beta_T_cell	0.0068	0.45	0.0022
UKB_460K.blood_PLATELET_COUNT	CD4-positive_alpha-beta_T_cell	0	0.81	0.26
UKB_460K.blood_RBC_DISTRIB_WIDTH	CD4-positive_alpha-beta_T_cell	0	1	0.85
UKB_460K.blood_RED_COUNT	CD4-positive_alpha-beta_T_cell	0	1	0.49
UKB_460K.blood_WHITE_COUNT	CD4-positive_alpha-beta_T_cell	0.00085	0.47	0.06
UKB_460K.disease_AID_ALL	CD4-positive_alpha-beta_T_cell	0.34	0.02	2.6e-06
UKB_460K.disease_ALLERGY_ECZEMA_DIAGNOSED	CD4-positive_alpha-beta_T_cell	0.23	0.02	7.4e-05
UKB_460K.disease_ASTHMA_DIAGNOSED	CD4-positive_alpha-beta_T_cell	0.16	0.02	6.2e-05
UKB_460K.disease_HYPOTHYROIDISM_SELF_REP	CD4-positive_alpha-beta_T_cell	0.43	0.02	1.1e-05
UKB_460K.disease_RESPIRATORY_ENT	CD4-positive_alpha-beta_T_cell	0.24	0.02	0.0002
PASS_ADHD_Demontis2018	CD4-positive_alpha-beta_T_cell	0	0.6	0.89
PASS_Alzheimers_Jansen2019	CD4-positive_alpha-beta_T_cell	0	1	0.89
PASS_BIP_Stahl2019	CD4-positive_alpha-beta_T_cell	0	1	0.67
PASS_DrinksPerWeek_Liu2019	CD4-positive_alpha-beta_T_cell	0	1	0.85
PASS_GeneralRiskTolerance_KarlssonLinner2019	CD4-positive_alpha-beta_T_cell	0	1	0.78
PASS_Insomnia_Jansen2019	CD4-positive_alpha-beta_T_cell	0	1	0.79
PASS_Intelligence_SavageJansen2018	CD4-positive_alpha-beta_T_cell	0.0017	0.98	0.79
PASS_MDD_Howard2019	CD4-positive_alpha-beta_T_cell	0.0017	0.91	0.27
PASS_ReactionTime_Davies2018	CD4-positive_alpha-beta_T_cell	0	0.93	0.63
PASS_SWB	CD4-positive_alpha-beta_T_cell	0	1	0.56
PASS_Schizophrenia_Pardinas2018	CD4-positive_alpha-beta_T_cell	0	1	0.77
PASS_SleepDuration_Dashti2019	CD4-positive_alpha-beta_T_cell	0.00085	1	0.93
PASS_VerbalNumericReasoning_Davies2018	CD4-positive_alpha-beta_T_cell	0	1	0.96
PASS_Worry_Nagel2018	CD4-positive_alpha-beta_T_cell	0	1	0.69
UKB_460K.body_BMIz	CD4-positive_alpha-beta_T_cell	0.00085	0.86	0.65
UKB_460K.cov_EDU_COLLEGE	CD4-positive_alpha-beta_T_cell	0.00085	1	0.86
UKB_460K.cov_EDU_YEARS	CD4-positive_alpha-beta_T_cell	0.0026	1	0.78
UKB_460K.cov_SMOKING_STATUS	CD4-positive_alpha-beta_T_cell	0	0.99	0.34
UKB_460K.mental_NEUROTICISM	CD4-positive_alpha-beta_T_cell	0.00085	1	0.45
UKB_460K.other_MORNINGPERSON	CD4-positive_alpha-beta_T_cell	0.00085	0.96	0.61
UKB_460K.repro_NumberChildrenEverBorn_Pooled	CD4-positive_alpha-beta_T_cell	0	0.95	0.72
PASS_AtrialFibrillation_Nielsen2018	CD4-positive_alpha-beta_T_cell	0	0.75	0.49
PASS_Coronary_Artery_Disease	CD4-positive_alpha-beta_T_cell	0	0.91	0.62
UKB_460K.bp_DIASTOLICadjMEDz	CD4-positive_alpha-beta_T_cell	0	1	0.86
UKB_460K.bp_SYSTOLICadjMEDz	CD4-positive_alpha-beta_T_cell	0	1	0.82
UKB_460K.disease_CARDIOVASCULAR	CD4-positive_alpha-beta_T_cell	0	1	0.51
UKB_460K.disease_HYPERTENSION_DIAGNOSED	CD4-positive_alpha-beta_T_cell	0	1	0.66
PASS_FastingGlucose_Manning	CD4-positive_alpha-beta_T_cell	0	1	0.19
UKB_460K.biochemistry_AlanineAminotransferase	CD4-positive_alpha-beta_T_cell	0.00085	1	0.38
UKB_460K.biochemistry_AlkalinePhosphatase	CD4-positive_alpha-beta_T_cell	0	1	0.7
UKB_460K.biochemistry_Cholesterol	CD4-positive_alpha-beta_T_cell	0.0017	0.96	0.75
UKB_460K.biochemistry_Glucose	CD4-positive_alpha-beta_T_cell	0	1	0.28
UKB_460K.biochemistry_HDLcholesterol	CD4-positive_alpha-beta_T_cell	0	1	0.53
UKB_460K.biochemistry_HbA1c	CD4-positive_alpha-beta_T_cell	0.00085	0.96	0.54
UKB_460K.biochemistry_LDLdirect	CD4-positive_alpha-beta_T_cell	0	1	0.26
UKB_460K.biochemistry_SHBG	CD4-positive_alpha-beta_T_cell	0	0.99	0.97
UKB_460K.biochemistry_Testosterone_Male	CD4-positive_alpha-beta_T_cell	0.00085	0.63	0.69
UKB_460K.biochemistry_TotalBilirubin	CD4-positive_alpha-beta_T_cell	0	0.95	0.36
UKB_460K.biochemistry_TotalProtein	CD4-positive_alpha-beta_T_cell	0	0.16	0.33
UKB_460K.biochemistry_Triglycerides	CD4-positive_alpha-beta_T_cell	0.00085	1	0.54
PASS_Type_1_Diabetes	CD4-positive_alpha-beta_T_cell	0	0.02	0.00063
PASS_Type_2_Diabetes	CD4-positive_alpha-beta_T_cell	0	1	0.82
UKB_460K.bmd_HEEL_TSCOREz	CD4-positive_alpha-beta_T_cell	0	1	0.73
UKB_460K.body_BALDING1	CD4-positive_alpha-beta_T_cell	0.00085	1	0.39
UKB_460K.body_HEIGHTz	CD4-positive_alpha-beta_T_cell	0	1	0.73
UKB_460K.body_WHRadjBMIz	CD4-positive_alpha-beta_T_cell	0	1	0.96
UKB_460K.cancer_BREAST	CD4-positive_alpha-beta_T_cell	0	1	0.55
UKB_460K.impedance_BASAL_METABOLIC_RATEz	CD4-positive_alpha-beta_T_cell	0	1	0.88
UKB_460K.lung_FEV1FVCzSMOKE	CD4-positive_alpha-beta_T_cell	0	1	0.61
UKB_460K.lung_FVCzSMOKE	CD4-positive_alpha-beta_T_cell	0	1	0.73
UKB_460K.pigment_HAIR	CD4-positive_alpha-beta_T_cell	0.0017	0.47	0.66
UKB_460K.repro_MENARCHE_AGE	CD4-positive_alpha-beta_T_cell	0	1	0.78
UKB_460K.repro_MENOPAUSE_AGE	CD4-positive_alpha-beta_T_cell	0	0.51	0.06
PASS_CD_deLange2017	CD8-positive_alpha-beta_T_cell	0.033	0.02	0.002
PASS_Celiac	CD8-positive_alpha-beta_T_cell	0.0019	0.02	0.08
PASS_IBD_deLange2017	CD8-positive_alpha-beta_T_cell	0.047	0.02	0.0014
PASS_Lupus	CD8-positive_alpha-beta_T_cell	0	0.11	0.079
PASS_Multiple_sclerosis	CD8-positive_alpha-beta_T_cell	0.11	0.02	0.032
PASS_Primary_biliary_cirrhosis	CD8-positive_alpha-beta_T_cell	0	0.31	0.24
PASS_Rheumatoid_Arthritis	CD8-positive_alpha-beta_T_cell	0.22	0.02	0.0079
PASS_UC_deLange2017	CD8-positive_alpha-beta_T_cell	0	0.25	0.24
UKB_460K.blood_EOSINOPHIL_COUNT	CD8-positive_alpha-beta_T_cell	0.27	0.02	0.0022
UKB_460K.blood_LYMPHOCYTE_COUNT	CD8-positive_alpha-beta_T_cell	0.073	0.02	0.00087
UKB_460K.blood_MEAN_CORPUSCULAR_HEMOGLOBIN	CD8-positive_alpha-beta_T_cell	0	0.34	0.16
UKB_460K.blood_MONOCYTE_COUNT	CD8-positive_alpha-beta_T_cell	0.0037	0.81	0.0044
UKB_460K.blood_PLATELET_COUNT	CD8-positive_alpha-beta_T_cell	0	0.76	0.32
UKB_460K.blood_RBC_DISTRIB_WIDTH	CD8-positive_alpha-beta_T_cell	0	0.85	0.34
UKB_460K.blood_RED_COUNT	CD8-positive_alpha-beta_T_cell	0	1	1
UKB_460K.blood_WHITE_COUNT	CD8-positive_alpha-beta_T_cell	0	0.91	0.05
UKB_460K.disease_AID_ALL	CD8-positive_alpha-beta_T_cell	0.23	0.02	5.5e-05
UKB_460K.disease_ALLERGY_ECZEMA_DIAGNOSED	CD8-positive_alpha-beta_T_cell	0.11	0.02	0.14
UKB_460K.disease_ASTHMA_DIAGNOSED	CD8-positive_alpha-beta_T_cell	0.092	0.02	0.00027
UKB_460K.disease_HYPOTHYROIDISM_SELF_REP	CD8-positive_alpha-beta_T_cell	0.31	0.02	5.8e-05
UKB_460K.disease_RESPIRATORY_ENT	CD8-positive_alpha-beta_T_cell	0.19	0.02	0.00017
PASS_ADHD_Demontis2018	CD8-positive_alpha-beta_T_cell	0	0.76	0.79
PASS_Alzheimers_Jansen2019	CD8-positive_alpha-beta_T_cell	0	1	0.72
PASS_BIP_Stahl2019	CD8-positive_alpha-beta_T_cell	0	1	0.58
PASS_DrinksPerWeek_Liu2019	CD8-positive_alpha-beta_T_cell	0	1	0.79
PASS_GeneralRiskTolerance_KarlssonLinner2019	CD8-positive_alpha-beta_T_cell	0	1	0.11
PASS_Insomnia_Jansen2019	CD8-positive_alpha-beta_T_cell	0	1	0.5
PASS_Intelligence_SavageJansen2018	CD8-positive_alpha-beta_T_cell	0.00093	1	0.37
PASS_MDD_Howard2019	CD8-positive_alpha-beta_T_cell	0.0019	0.81	0.57
PASS_ReactionTime_Davies2018	CD8-positive_alpha-beta_T_cell	0	0.99	0.94
PASS_SWB	CD8-positive_alpha-beta_T_cell	0	1	0.87
PASS_Schizophrenia_Pardinas2018	CD8-positive_alpha-beta_T_cell	0.00093	1	0.51
PASS_SleepDuration_Dashti2019	CD8-positive_alpha-beta_T_cell	0.0019	0.76	0.69
PASS_VerbalNumericReasoning_Davies2018	CD8-positive_alpha-beta_T_cell	0	1	0.026
PASS_Worry_Nagel2018	CD8-positive_alpha-beta_T_cell	0	0.99	0.84
UKB_460K.body_BMIz	CD8-positive_alpha-beta_T_cell	0.0028	0.85	0.63
UKB_460K.cov_EDU_COLLEGE	CD8-positive_alpha-beta_T_cell	0	1	0.87
UKB_460K.cov_EDU_YEARS	CD8-positive_alpha-beta_T_cell	0.00093	1	0.46
UKB_460K.cov_SMOKING_STATUS	CD8-positive_alpha-beta_T_cell	0	0.87	0.71
UKB_460K.mental_NEUROTICISM	CD8-positive_alpha-beta_T_cell	0.0019	0.82	0.41
UKB_460K.other_MORNINGPERSON	CD8-positive_alpha-beta_T_cell	0.0019	0.99	0.099
UKB_460K.repro_NumberChildrenEverBorn_Pooled	CD8-positive_alpha-beta_T_cell	0	0.88	0.92
PASS_AtrialFibrillation_Nielsen2018	CD8-positive_alpha-beta_T_cell	0	0.61	0.89
PASS_Coronary_Artery_Disease	CD8-positive_alpha-beta_T_cell	0	1	0.91
UKB_460K.bp_DIASTOLICadjMEDz	CD8-positive_alpha-beta_T_cell	0	1	0.93
UKB_460K.bp_SYSTOLICadjMEDz	CD8-positive_alpha-beta_T_cell	0	1	0.69
UKB_460K.disease_CARDIOVASCULAR	CD8-positive_alpha-beta_T_cell	0	1	0.74
UKB_460K.disease_HYPERTENSION_DIAGNOSED	CD8-positive_alpha-beta_T_cell	0	1	0.49
PASS_FastingGlucose_Manning	CD8-positive_alpha-beta_T_cell	0	1	0.53
UKB_460K.biochemistry_AlanineAminotransferase	CD8-positive_alpha-beta_T_cell	0	1	0.54
UKB_460K.biochemistry_AlkalinePhosphatase	CD8-positive_alpha-beta_T_cell	0	1	0.71
UKB_460K.biochemistry_Cholesterol	CD8-positive_alpha-beta_T_cell	0	1	0.71
UKB_460K.biochemistry_Glucose	CD8-positive_alpha-beta_T_cell	0	1	0.61
UKB_460K.biochemistry_HDLcholesterol	CD8-positive_alpha-beta_T_cell	0	1	0.74
UKB_460K.biochemistry_HbA1c	CD8-positive_alpha-beta_T_cell	0	0.82	0.8
UKB_460K.biochemistry_LDLdirect	CD8-positive_alpha-beta_T_cell	0	1	0.48
UKB_460K.biochemistry_SHBG	CD8-positive_alpha-beta_T_cell	0	0.93	0.81
UKB_460K.biochemistry_Testosterone_Male	CD8-positive_alpha-beta_T_cell	0.0019	0.58	0.79
UKB_460K.biochemistry_TotalBilirubin	CD8-positive_alpha-beta_T_cell	0	0.94	0.17
UKB_460K.biochemistry_TotalProtein	CD8-positive_alpha-beta_T_cell	0	0.55	0.13
UKB_460K.biochemistry_Triglycerides	CD8-positive_alpha-beta_T_cell	0	1	0.25
PASS_Type_1_Diabetes	CD8-positive_alpha-beta_T_cell	0	0.02	0.0027
PASS_Type_2_Diabetes	CD8-positive_alpha-beta_T_cell	0	1	0.14
UKB_460K.bmd_HEEL_TSCOREz	CD8-positive_alpha-beta_T_cell	0	1	0.14
UKB_460K.body_BALDING1	CD8-positive_alpha-beta_T_cell	0	1	0.57
UKB_460K.body_HEIGHTz	CD8-positive_alpha-beta_T_cell	0	1	0.88
UKB_460K.body_WHRadjBMIz	CD8-positive_alpha-beta_T_cell	0	1	0.74
UKB_460K.cancer_BREAST	CD8-positive_alpha-beta_T_cell	0	1	0.79
UKB_460K.impedance_BASAL_METABOLIC_RATEz	CD8-positive_alpha-beta_T_cell	0	1	0.74
UKB_460K.lung_FEV1FVCzSMOKE	CD8-positive_alpha-beta_T_cell	0.00093	1	0.77
UKB_460K.lung_FVCzSMOKE	CD8-positive_alpha-beta_T_cell	0	1	0.53
UKB_460K.pigment_HAIR	CD8-positive_alpha-beta_T_cell	0	1	0.98
UKB_460K.repro_MENARCHE_AGE	CD8-positive_alpha-beta_T_cell	0	1	0.69
UKB_460K.repro_MENOPAUSE_AGE	CD8-positive_alpha-beta_T_cell	0	0.47	0.026
PASS_CD_deLange2017	DN4_thymocyte	0.017	0.034	0.14
PASS_Celiac	DN4_thymocyte	0	0.02	0.17
PASS_IBD_deLange2017	DN4_thymocyte	0.027	0.02	0.14
PASS_Lupus	DN4_thymocyte	0	0.02	0.53
PASS_Multiple_sclerosis	DN4_thymocyte	0.11	0.02	0.39
PASS_Primary_biliary_cirrhosis	DN4_thymocyte	0.00057	0.21	0.75
PASS_Rheumatoid_Arthritis	DN4_thymocyte	0.19	0.02	0.54
PASS_UC_deLange2017	DN4_thymocyte	0.0017	0.067	0.33
UKB_460K.blood_EOSINOPHIL_COUNT	DN4_thymocyte	0.23	0.02	0.3
UKB_460K.blood_LYMPHOCYTE_COUNT	DN4_thymocyte	0.076	0.02	0.22
UKB_460K.blood_MEAN_CORPUSCULAR_HEMOGLOBIN	DN4_thymocyte	0	0.36	0.55
UKB_460K.blood_MONOCYTE_COUNT	DN4_thymocyte	0.011	0.21	0.17
UKB_460K.blood_PLATELET_COUNT	DN4_thymocyte	0	0.9	0.98
UKB_460K.blood_RBC_DISTRIB_WIDTH	DN4_thymocyte	0	1	0.36
UKB_460K.blood_RED_COUNT	DN4_thymocyte	0	0.78	0.38
UKB_460K.blood_WHITE_COUNT	DN4_thymocyte	0	0.8	0.56
UKB_460K.disease_AID_ALL	DN4_thymocyte	0.14	0.02	0.17
UKB_460K.disease_ALLERGY_ECZEMA_DIAGNOSED	DN4_thymocyte	0.18	0.02	0.18
UKB_460K.disease_ASTHMA_DIAGNOSED	DN4_thymocyte	0.1	0.02	0.3
UKB_460K.disease_HYPOTHYROIDISM_SELF_REP	DN4_thymocyte	0.27	0.02	0.12
UKB_460K.disease_RESPIRATORY_ENT	DN4_thymocyte	0.21	0.02	0.11
PASS_ADHD_Demontis2018	DN4_thymocyte	0	0.71	0.84
PASS_Alzheimers_Jansen2019	DN4_thymocyte	0	1	0.94
PASS_BIP_Stahl2019	DN4_thymocyte	0	0.8	0.23
PASS_DrinksPerWeek_Liu2019	DN4_thymocyte	0	1	0.34
PASS_GeneralRiskTolerance_KarlssonLinner2019	DN4_thymocyte	0	1	0.13
PASS_Insomnia_Jansen2019	DN4_thymocyte	0	0.96	0.29
PASS_Intelligence_SavageJansen2018	DN4_thymocyte	0	1	0.66
PASS_MDD_Howard2019	DN4_thymocyte	0.00057	0.83	0.6
PASS_ReactionTime_Davies2018	DN4_thymocyte	0	0.9	0.88
PASS_SWB	DN4_thymocyte	0.00057	1	0.25
PASS_Schizophrenia_Pardinas2018	DN4_thymocyte	0.0023	0.55	0.026
PASS_SleepDuration_Dashti2019	DN4_thymocyte	0.00057	0.36	0.069
PASS_VerbalNumericReasoning_Davies2018	DN4_thymocyte	0	1	0.56
PASS_Worry_Nagel2018	DN4_thymocyte	0	1	0.22
UKB_460K.body_BMIz	DN4_thymocyte	0.0063	0.43	0.13
UKB_460K.cov_EDU_COLLEGE	DN4_thymocyte	0.00057	0.82	0.67
UKB_460K.cov_EDU_YEARS	DN4_thymocyte	0.00057	1	0.37
UKB_460K.cov_SMOKING_STATUS	DN4_thymocyte	0	0.78	0.2
UKB_460K.mental_NEUROTICISM	DN4_thymocyte	0.0011	0.9	0.54
UKB_460K.other_MORNINGPERSON	DN4_thymocyte	0	0.88	0.12
UKB_460K.repro_NumberChildrenEverBorn_Pooled	DN4_thymocyte	0.00057	0.65	0.22
PASS_AtrialFibrillation_Nielsen2018	DN4_thymocyte	0	0.68	0.75
PASS_Coronary_Artery_Disease	DN4_thymocyte	0	1	0.79
UKB_460K.bp_DIASTOLICadjMEDz	DN4_thymocyte	0	1	0.7
UKB_460K.bp_SYSTOLICadjMEDz	DN4_thymocyte	0	1	0.71
UKB_460K.disease_CARDIOVASCULAR	DN4_thymocyte	0	1	0.61
UKB_460K.disease_HYPERTENSION_DIAGNOSED	DN4_thymocyte	0	1	0.22
PASS_FastingGlucose_Manning	DN4_thymocyte	0.00057	0.96	0.13
UKB_460K.biochemistry_AlanineAminotransferase	DN4_thymocyte	0	1	0.37
UKB_460K.biochemistry_AlkalinePhosphatase	DN4_thymocyte	0	1	0.12
UKB_460K.biochemistry_Cholesterol	DN4_thymocyte	0.0017	0.73	0.076
UKB_460K.biochemistry_Glucose	DN4_thymocyte	0.0011	0.7	0.13
UKB_460K.biochemistry_HDLcholesterol	DN4_thymocyte	0	1	0.3
UKB_460K.biochemistry_HbA1c	DN4_thymocyte	0	0.96	0.62
UKB_460K.biochemistry_LDLdirect	DN4_thymocyte	0	1	0.27
UKB_460K.biochemistry_SHBG	DN4_thymocyte	0	0.97	0.88
UKB_460K.biochemistry_Testosterone_Male	DN4_thymocyte	0.00057	0.31	0.99
UKB_460K.biochemistry_TotalBilirubin	DN4_thymocyte	0	0.98	0.6
UKB_460K.biochemistry_TotalProtein	DN4_thymocyte	0	0.55	0.57
UKB_460K.biochemistry_Triglycerides	DN4_thymocyte	0	1	0.11
PASS_Type_1_Diabetes	DN4_thymocyte	0	0.046	0.69
PASS_Type_2_Diabetes	DN4_thymocyte	0.00057	1	0.73
UKB_460K.bmd_HEEL_TSCOREz	DN4_thymocyte	0	1	0.076
UKB_460K.body_BALDING1	DN4_thymocyte	0	1	0.19
UKB_460K.body_HEIGHTz	DN4_thymocyte	0.00057	1	0.5
UKB_460K.body_WHRadjBMIz	DN4_thymocyte	0.00057	1	0.17
UKB_460K.cancer_BREAST	DN4_thymocyte	0	1	0.27
UKB_460K.impedance_BASAL_METABOLIC_RATEz	DN4_thymocyte	0	0.97	0.35
UKB_460K.lung_FEV1FVCzSMOKE	DN4_thymocyte	0.0017	1	0.55
UKB_460K.lung_FVCzSMOKE	DN4_thymocyte	0.00057	1	0.73
UKB_460K.pigment_HAIR	DN4_thymocyte	0	0.97	0.32
UKB_460K.repro_MENARCHE_AGE	DN4_thymocyte	0	0.47	0.076
UKB_460K.repro_MENOPAUSE_AGE	DN4_thymocyte	0	0.33	0.41
PASS_CD_deLange2017	Kupffer_cell	0	0.38	0.026
PASS_Celiac	Kupffer_cell	0	0.77	0.14
PASS_IBD_deLange2017	Kupffer_cell	0	1	0.2
PASS_Lupus	Kupffer_cell	0	0.65	0.18
PASS_Multiple_sclerosis	Kupffer_cell	0.034	0.084	0.2
PASS_Primary_biliary_cirrhosis	Kupffer_cell	0	0.21	0.026
PASS_Rheumatoid_Arthritis	Kupffer_cell	0	1	0.42
PASS_UC_deLange2017	Kupffer_cell	0	1	0.8
UKB_460K.blood_EOSINOPHIL_COUNT	Kupffer_cell	0.0038	0.49	0.069
UKB_460K.blood_LYMPHOCYTE_COUNT	Kupffer_cell	0.061	0.11	0.026
UKB_460K.blood_MEAN_CORPUSCULAR_HEMOGLOBIN	Kupffer_cell	0	0.91	0.32
UKB_460K.blood_MONOCYTE_COUNT	Kupffer_cell	0.11	0.02	0.026
UKB_460K.blood_PLATELET_COUNT	Kupffer_cell	0	0.33	0.21
UKB_460K.blood_RBC_DISTRIB_WIDTH	Kupffer_cell	0	0.37	0.42
UKB_460K.blood_RED_COUNT	Kupffer_cell	0	1	0.8
UKB_460K.blood_WHITE_COUNT	Kupffer_cell	0	0.31	0.039
UKB_460K.disease_AID_ALL	Kupffer_cell	0.015	0.51	0.026
UKB_460K.disease_ALLERGY_ECZEMA_DIAGNOSED	Kupffer_cell	0	1	0.27
UKB_460K.disease_ASTHMA_DIAGNOSED	Kupffer_cell	0	1	0.62
UKB_460K.disease_HYPOTHYROIDISM_SELF_REP	Kupffer_cell	0.011	0.27	0.026
UKB_460K.disease_RESPIRATORY_ENT	Kupffer_cell	0	1	0.96
PASS_ADHD_Demontis2018	Kupffer_cell	0	1	0.34
PASS_Alzheimers_Jansen2019	Kupffer_cell	0	0.68	0.66
PASS_BIP_Stahl2019	Kupffer_cell	0	1	0.54
PASS_DrinksPerWeek_Liu2019	Kupffer_cell	0	1	0.71
PASS_GeneralRiskTolerance_KarlssonLinner2019	Kupffer_cell	0	1	0.85
PASS_Insomnia_Jansen2019	Kupffer_cell	0	1	0.69
PASS_Intelligence_SavageJansen2018	Kupffer_cell	0	1	0.56
PASS_MDD_Howard2019	Kupffer_cell	0	1	0.9
PASS_ReactionTime_Davies2018	Kupffer_cell	0	1	0.83
PASS_SWB	Kupffer_cell	0	1	0.58
PASS_Schizophrenia_Pardinas2018	Kupffer_cell	0	0.93	0.73
PASS_SleepDuration_Dashti2019	Kupffer_cell	0	0.58	0.48
PASS_VerbalNumericReasoning_Davies2018	Kupffer_cell	0	0.67	0.52
PASS_Worry_Nagel2018	Kupffer_cell	0	1	0.76
UKB_460K.body_BMIz	Kupffer_cell	0	1	0.55
UKB_460K.cov_EDU_COLLEGE	Kupffer_cell	0	1	0.45
UKB_460K.cov_EDU_YEARS	Kupffer_cell	0	1	0.47
UKB_460K.cov_SMOKING_STATUS	Kupffer_cell	0	1	0.53
UKB_460K.mental_NEUROTICISM	Kupffer_cell	0	1	0.77
UKB_460K.other_MORNINGPERSON	Kupffer_cell	0	0.87	0.65
UKB_460K.repro_NumberChildrenEverBorn_Pooled	Kupffer_cell	0	1	0.65
PASS_AtrialFibrillation_Nielsen2018	Kupffer_cell	0	1	0.88
PASS_Coronary_Artery_Disease	Kupffer_cell	0	0.62	0.93
UKB_460K.bp_DIASTOLICadjMEDz	Kupffer_cell	0	1	0.53
UKB_460K.bp_SYSTOLICadjMEDz	Kupffer_cell	0	1	0.47
UKB_460K.disease_CARDIOVASCULAR	Kupffer_cell	0	0.39	0.21
UKB_460K.disease_HYPERTENSION_DIAGNOSED	Kupffer_cell	0	1	0.21
PASS_FastingGlucose_Manning	Kupffer_cell	0	1	0.69
UKB_460K.biochemistry_AlanineAminotransferase	Kupffer_cell	0	0.26	0.28
UKB_460K.biochemistry_AlkalinePhosphatase	Kupffer_cell	0	0.63	0.38
UKB_460K.biochemistry_Cholesterol	Kupffer_cell	0.061	0.046	0.27
UKB_460K.biochemistry_Glucose	Kupffer_cell	0	1	0.54
UKB_460K.biochemistry_HDLcholesterol	Kupffer_cell	0.015	0.14	0.38
UKB_460K.biochemistry_HbA1c	Kupffer_cell	0.0038	0.33	0.15
UKB_460K.biochemistry_LDLdirect	Kupffer_cell	0.046	0.11	0.32
UKB_460K.biochemistry_SHBG	Kupffer_cell	0	0.58	0.36
UKB_460K.biochemistry_Testosterone_Male	Kupffer_cell	0	0.55	0.19
UKB_460K.biochemistry_TotalBilirubin	Kupffer_cell	0	0.4	0.33
UKB_460K.biochemistry_TotalProtein	Kupffer_cell	0.0076	0.067	0.28
UKB_460K.biochemistry_Triglycerides	Kupffer_cell	0.031	0.093	0.32
PASS_Type_1_Diabetes	Kupffer_cell	0	0.76	0.039
PASS_Type_2_Diabetes	Kupffer_cell	0	1	0.9
UKB_460K.bmd_HEEL_TSCOREz	Kupffer_cell	0.0076	0.64	0.72
UKB_460K.body_BALDING1	Kupffer_cell	0	0.77	0.45
UKB_460K.body_HEIGHTz	Kupffer_cell	0	1	0.3
UKB_460K.body_WHRadjBMIz	Kupffer_cell	0	0.66	0.58
UKB_460K.cancer_BREAST	Kupffer_cell	0	1	0.67
UKB_460K.impedance_BASAL_METABOLIC_RATEz	Kupffer_cell	0	1	0.75
UKB_460K.lung_FEV1FVCzSMOKE	Kupffer_cell	0	1	0.32
UKB_460K.lung_FVCzSMOKE	Kupffer_cell	0	1	0.69
UKB_460K.pigment_HAIR	Kupffer_cell	0	1	0.75
UKB_460K.repro_MENARCHE_AGE	Kupffer_cell	0	1	0.98
UKB_460K.repro_MENOPAUSE_AGE	Kupffer_cell	0	1	0.86
PASS_CD_deLange2017	NK_cell	0.048	0.046	0.0011
PASS_Celiac	NK_cell	0	0.1	0.1
PASS_IBD_deLange2017	NK_cell	0.04	0.02	0.00052
PASS_Lupus	NK_cell	0	0.27	0.026
PASS_Multiple_sclerosis	NK_cell	0.063	0.046	0.026
PASS_Primary_biliary_cirrhosis	NK_cell	0.0034	0.19	0.062
PASS_Rheumatoid_Arthritis	NK_cell	0.096	0.02	0.08
PASS_UC_deLange2017	NK_cell	0.0034	0.2	0.045
UKB_460K.blood_EOSINOPHIL_COUNT	NK_cell	0.2	0.02	0.002
UKB_460K.blood_LYMPHOCYTE_COUNT	NK_cell	0.082	0.02	0.026
UKB_460K.blood_MEAN_CORPUSCULAR_HEMOGLOBIN	NK_cell	0	0.4	0.026
UKB_460K.blood_MONOCYTE_COUNT	NK_cell	0.031	0.13	0.0019
UKB_460K.blood_PLATELET_COUNT	NK_cell	0	0.83	0.44
UKB_460K.blood_RBC_DISTRIB_WIDTH	NK_cell	0	0.89	0.24
UKB_460K.blood_RED_COUNT	NK_cell	0	1	0.62
UKB_460K.blood_WHITE_COUNT	NK_cell	0	0.77	0.025
UKB_460K.disease_AID_ALL	NK_cell	0.17	0.02	0.0011
UKB_460K.disease_ALLERGY_ECZEMA_DIAGNOSED	NK_cell	0.05	0.057	0.19
UKB_460K.disease_ASTHMA_DIAGNOSED	NK_cell	0.067	0.046	0.026
UKB_460K.disease_HYPOTHYROIDISM_SELF_REP	NK_cell	0.23	0.02	0.005
UKB_460K.disease_RESPIRATORY_ENT	NK_cell	0.13	0.02	0.026
PASS_ADHD_Demontis2018	NK_cell	0	1	0.8
PASS_Alzheimers_Jansen2019	NK_cell	0	1	0.75
PASS_BIP_Stahl2019	NK_cell	0	1	0.77
PASS_DrinksPerWeek_Liu2019	NK_cell	0	1	0.85
PASS_GeneralRiskTolerance_KarlssonLinner2019	NK_cell	0	1	0.48
PASS_Insomnia_Jansen2019	NK_cell	0	1	0.87
PASS_Intelligence_SavageJansen2018	NK_cell	0	1	0.39
PASS_MDD_Howard2019	NK_cell	0	1	0.93
PASS_ReactionTime_Davies2018	NK_cell	0	1	0.46
PASS_SWB	NK_cell	0	1	0.48
PASS_Schizophrenia_Pardinas2018	NK_cell	0	1	0.81
PASS_SleepDuration_Dashti2019	NK_cell	0.0011	0.89	0.86
PASS_VerbalNumericReasoning_Davies2018	NK_cell	0	1	0.27
PASS_Worry_Nagel2018	NK_cell	0	1	0.29
UKB_460K.body_BMIz	NK_cell	0	1	0.8
UKB_460K.cov_EDU_COLLEGE	NK_cell	0.0011	1	0.79
UKB_460K.cov_EDU_YEARS	NK_cell	0	1	0.67
UKB_460K.cov_SMOKING_STATUS	NK_cell	0	1	0.86
UKB_460K.mental_NEUROTICISM	NK_cell	0	1	0.4
UKB_460K.other_MORNINGPERSON	NK_cell	0	1	0.91
UKB_460K.repro_NumberChildrenEverBorn_Pooled	NK_cell	0	1	0.43
PASS_AtrialFibrillation_Nielsen2018	NK_cell	0	1	0.91
PASS_Coronary_Artery_Disease	NK_cell	0	1	0.88
UKB_460K.bp_DIASTOLICadjMEDz	NK_cell	0	1	0.66
UKB_460K.bp_SYSTOLICadjMEDz	NK_cell	0	1	0.84
UKB_460K.disease_CARDIOVASCULAR	NK_cell	0	1	0.54
UKB_460K.disease_HYPERTENSION_DIAGNOSED	NK_cell	0	1	0.57
PASS_FastingGlucose_Manning	NK_cell	0	1	0.78
UKB_460K.biochemistry_AlanineAminotransferase	NK_cell	0	1	0.38
UKB_460K.biochemistry_AlkalinePhosphatase	NK_cell	0	1	0.57
UKB_460K.biochemistry_Cholesterol	NK_cell	0.0011	1	0.69
UKB_460K.biochemistry_Glucose	NK_cell	0	0.97	0.53
UKB_460K.biochemistry_HDLcholesterol	NK_cell	0	1	0.62
UKB_460K.biochemistry_HbA1c	NK_cell	0	1	0.5
UKB_460K.biochemistry_LDLdirect	NK_cell	0.0011	1	0.68
UKB_460K.biochemistry_SHBG	NK_cell	0	1	0.97
UKB_460K.biochemistry_Testosterone_Male	NK_cell	0	0.91	0.46
UKB_460K.biochemistry_TotalBilirubin	NK_cell	0	1	0.46
UKB_460K.biochemistry_TotalProtein	NK_cell	0	0.54	0.42
UKB_460K.biochemistry_Triglycerides	NK_cell	0.0011	1	0.77
PASS_Type_1_Diabetes	NK_cell	0	0.067	0.0007
PASS_Type_2_Diabetes	NK_cell	0	1	0.93
UKB_460K.bmd_HEEL_TSCOREz	NK_cell	0	1	0.57
UKB_460K.body_BALDING1	NK_cell	0.0011	0.97	0.27
UKB_460K.body_HEIGHTz	NK_cell	0	1	0.076
UKB_460K.body_WHRadjBMIz	NK_cell	0	1	0.42
UKB_460K.cancer_BREAST	NK_cell	0	1	0.8
UKB_460K.impedance_BASAL_METABOLIC_RATEz	NK_cell	0	1	0.79
UKB_460K.lung_FEV1FVCzSMOKE	NK_cell	0.0011	1	0.55
UKB_460K.lung_FVCzSMOKE	NK_cell	0	1	0.38
UKB_460K.pigment_HAIR	NK_cell	0	1	0.57
UKB_460K.repro_MENARCHE_AGE	NK_cell	0	1	0.95
UKB_460K.repro_MENOPAUSE_AGE	NK_cell	0	0.65	0.57
PASS_CD_deLange2017	T_cell	0.059	0.02	8.5e-07
PASS_Celiac	T_cell	0.0015	0.02	0.06
PASS_IBD_deLange2017	T_cell	0.12	0.02	3.1e-06
PASS_Lupus	T_cell	0	0.034	0.0014
PASS_Multiple_sclerosis	T_cell	0.091	0.02	0.00012
PASS_Primary_biliary_cirrhosis	T_cell	0.0015	0.16	0.06
PASS_Rheumatoid_Arthritis	T_cell	0.19	0.02	7.4e-08
PASS_UC_deLange2017	T_cell	0.011	0.02	0.026
UKB_460K.blood_EOSINOPHIL_COUNT	T_cell	0.32	0.02	4.8e-09
UKB_460K.blood_LYMPHOCYTE_COUNT	T_cell	0.059	0.02	0.0046
UKB_460K.blood_MEAN_CORPUSCULAR_HEMOGLOBIN	T_cell	0.0015	0.32	0.0027
UKB_460K.blood_MONOCYTE_COUNT	T_cell	0.02	0.14	0.0035
UKB_460K.blood_PLATELET_COUNT	T_cell	0	0.98	1
UKB_460K.blood_RBC_DISTRIB_WIDTH	T_cell	0.0015	1	0.19
UKB_460K.blood_RED_COUNT	T_cell	0	1	0.044
UKB_460K.blood_WHITE_COUNT	T_cell	0.0053	0.23	0.18
UKB_460K.disease_AID_ALL	T_cell	0.27	0.02	1.4e-08
UKB_460K.disease_ALLERGY_ECZEMA_DIAGNOSED	T_cell	0.19	0.02	0.0011
UKB_460K.disease_ASTHMA_DIAGNOSED	T_cell	0.17	0.02	4.5e-08
UKB_460K.disease_HYPOTHYROIDISM_SELF_REP	T_cell	0.31	0.02	1.5e-08
UKB_460K.disease_RESPIRATORY_ENT	T_cell	0.29	0.02	7.4e-08
PASS_ADHD_Demontis2018	T_cell	0	0.47	0.97
PASS_Alzheimers_Jansen2019	T_cell	0	1	0.59
PASS_BIP_Stahl2019	T_cell	0	0.99	0.26
PASS_DrinksPerWeek_Liu2019	T_cell	0	1	0.8
PASS_GeneralRiskTolerance_KarlssonLinner2019	T_cell	0	1	0.47
PASS_Insomnia_Jansen2019	T_cell	0	1	0.54
PASS_Intelligence_SavageJansen2018	T_cell	0.00075	1	0.76
PASS_MDD_Howard2019	T_cell	0.0023	0.76	0.75
PASS_ReactionTime_Davies2018	T_cell	0	1	0.68
PASS_SWB	T_cell	0.0023	1	0.6
PASS_Schizophrenia_Pardinas2018	T_cell	0	1	0.28
PASS_SleepDuration_Dashti2019	T_cell	0.0023	0.61	0.48
PASS_VerbalNumericReasoning_Davies2018	T_cell	0	1	0.56
PASS_Worry_Nagel2018	T_cell	0.0015	1	0.14
UKB_460K.body_BMIz	T_cell	0.003	0.73	0.69
UKB_460K.cov_EDU_COLLEGE	T_cell	0.00075	1	0.54
UKB_460K.cov_EDU_YEARS	T_cell	0.00075	1	0.75
UKB_460K.cov_SMOKING_STATUS	T_cell	0	0.92	0.48
UKB_460K.mental_NEUROTICISM	T_cell	0.0015	0.87	0.22
UKB_460K.other_MORNINGPERSON	T_cell	0.00075	0.8	0.67
UKB_460K.repro_NumberChildrenEverBorn_Pooled	T_cell	0	1	0.86
PASS_AtrialFibrillation_Nielsen2018	T_cell	0	0.76	0.44
PASS_Coronary_Artery_Disease	T_cell	0	1	0.2
UKB_460K.bp_DIASTOLICadjMEDz	T_cell	0.00075	1	0.69
UKB_460K.bp_SYSTOLICadjMEDz	T_cell	0	1	0.68
UKB_460K.disease_CARDIOVASCULAR	T_cell	0	1	0.45
UKB_460K.disease_HYPERTENSION_DIAGNOSED	T_cell	0	1	0.28
PASS_FastingGlucose_Manning	T_cell	0	1	0.45
UKB_460K.biochemistry_AlanineAminotransferase	T_cell	0	1	0.89
UKB_460K.biochemistry_AlkalinePhosphatase	T_cell	0.00075	1	0.38
UKB_460K.biochemistry_Cholesterol	T_cell	0	1	0.87
UKB_460K.biochemistry_Glucose	T_cell	0.00075	0.94	0.35
UKB_460K.biochemistry_HDLcholesterol	T_cell	0	1	0.35
UKB_460K.biochemistry_HbA1c	T_cell	0	0.99	0.75
UKB_460K.biochemistry_LDLdirect	T_cell	0	1	0.84
UKB_460K.biochemistry_SHBG	T_cell	0	1	0.74
UKB_460K.biochemistry_Testosterone_Male	T_cell	0	0.65	0.66
UKB_460K.biochemistry_TotalBilirubin	T_cell	0	1	0.13
UKB_460K.biochemistry_TotalProtein	T_cell	0.0023	0.19	0.0052
UKB_460K.biochemistry_Triglycerides	T_cell	0	1	0.046
PASS_Type_1_Diabetes	T_cell	0.00075	0.02	0.0012
PASS_Type_2_Diabetes	T_cell	0	1	0.33
UKB_460K.bmd_HEEL_TSCOREz	T_cell	0	1	0.37
UKB_460K.body_BALDING1	T_cell	0.00075	1	0.54
UKB_460K.body_HEIGHTz	T_cell	0.0015	1	0.22
UKB_460K.body_WHRadjBMIz	T_cell	0	1	0.2
UKB_460K.cancer_BREAST	T_cell	0	1	0.8
UKB_460K.impedance_BASAL_METABOLIC_RATEz	T_cell	0	0.85	0.95
UKB_460K.lung_FEV1FVCzSMOKE	T_cell	0.0023	1	0.12
UKB_460K.lung_FVCzSMOKE	T_cell	0	1	0.39
UKB_460K.pigment_HAIR	T_cell	0.00075	1	0.54
UKB_460K.repro_MENARCHE_AGE	T_cell	0	1	0.54
UKB_460K.repro_MENOPAUSE_AGE	T_cell	0	0.37	0.61
PASS_CD_deLange2017	adventitial_cell	0	1	0.24
PASS_Celiac	adventitial_cell	0	0.59	0.35
PASS_IBD_deLange2017	adventitial_cell	0	1	0.47
PASS_Lupus	adventitial_cell	0	1	0.34
PASS_Multiple_sclerosis	adventitial_cell	0	1	0.17
PASS_Primary_biliary_cirrhosis	adventitial_cell	0	1	0.13
PASS_Rheumatoid_Arthritis	adventitial_cell	0	1	0.54
PASS_UC_deLange2017	adventitial_cell	0	1	0.19
UKB_460K.blood_EOSINOPHIL_COUNT	adventitial_cell	0	1	0.37
UKB_460K.blood_LYMPHOCYTE_COUNT	adventitial_cell	0	1	0.34
UKB_460K.blood_MEAN_CORPUSCULAR_HEMOGLOBIN	adventitial_cell	0	1	0.83
UKB_460K.blood_MONOCYTE_COUNT	adventitial_cell	0	1	0.54
UKB_460K.blood_PLATELET_COUNT	adventitial_cell	0	0.96	0.75
UKB_460K.blood_RBC_DISTRIB_WIDTH	adventitial_cell	0	1	0.72
UKB_460K.blood_RED_COUNT	adventitial_cell	0	1	0.89
UKB_460K.blood_WHITE_COUNT	adventitial_cell	0	1	0.76
UKB_460K.disease_AID_ALL	adventitial_cell	0.0035	1	0.54
UKB_460K.disease_ALLERGY_ECZEMA_DIAGNOSED	adventitial_cell	0	1	0.54
UKB_460K.disease_ASTHMA_DIAGNOSED	adventitial_cell	0	1	0.38
UKB_460K.disease_HYPOTHYROIDISM_SELF_REP	adventitial_cell	0	1	0.9
UKB_460K.disease_RESPIRATORY_ENT	adventitial_cell	0	1	0.22
PASS_ADHD_Demontis2018	adventitial_cell	0	0.9	0.96
PASS_Alzheimers_Jansen2019	adventitial_cell	0	1	0.75
PASS_BIP_Stahl2019	adventitial_cell	0	0.96	0.65
PASS_DrinksPerWeek_Liu2019	adventitial_cell	0	0.78	0.94
PASS_GeneralRiskTolerance_KarlssonLinner2019	adventitial_cell	0	1	0.29
PASS_Insomnia_Jansen2019	adventitial_cell	0	0.71	0.77
PASS_Intelligence_SavageJansen2018	adventitial_cell	0	1	0.74
PASS_MDD_Howard2019	adventitial_cell	0.0035	0.29	0.61
PASS_ReactionTime_Davies2018	adventitial_cell	0	1	0.73
PASS_SWB	adventitial_cell	0	0.25	0.45
PASS_Schizophrenia_Pardinas2018	adventitial_cell	0.0035	0.86	0.97
PASS_SleepDuration_Dashti2019	adventitial_cell	0.0035	0.96	0.82
PASS_VerbalNumericReasoning_Davies2018	adventitial_cell	0	0.88	0.85
PASS_Worry_Nagel2018	adventitial_cell	0	0.8	0.98
UKB_460K.body_BMIz	adventitial_cell	0	0.98	0.77
UKB_460K.cov_EDU_COLLEGE	adventitial_cell	0	1	0.84
UKB_460K.cov_EDU_YEARS	adventitial_cell	0.0035	0.6	0.8
UKB_460K.cov_SMOKING_STATUS	adventitial_cell	0	0.95	0.95
UKB_460K.mental_NEUROTICISM	adventitial_cell	0	0.65	0.71
UKB_460K.other_MORNINGPERSON	adventitial_cell	0	0.57	0.96
UKB_460K.repro_NumberChildrenEverBorn_Pooled	adventitial_cell	0	0.96	0.74
PASS_AtrialFibrillation_Nielsen2018	adventitial_cell	0	0.96	0.25
PASS_Coronary_Artery_Disease	adventitial_cell	0	0.77	0.78
UKB_460K.bp_DIASTOLICadjMEDz	adventitial_cell	0	0.84	0.62
UKB_460K.bp_SYSTOLICadjMEDz	adventitial_cell	0	0.48	0.91
UKB_460K.disease_CARDIOVASCULAR	adventitial_cell	0	0.89	0.81
UKB_460K.disease_HYPERTENSION_DIAGNOSED	adventitial_cell	0	0.63	0.88
PASS_FastingGlucose_Manning	adventitial_cell	0	1	0.95
UKB_460K.biochemistry_AlanineAminotransferase	adventitial_cell	0	0.72	0.69
UKB_460K.biochemistry_AlkalinePhosphatase	adventitial_cell	0.0035	0.27	0.58
UKB_460K.biochemistry_Cholesterol	adventitial_cell	0	1	0.6
UKB_460K.biochemistry_Glucose	adventitial_cell	0	1	0.96
UKB_460K.biochemistry_HDLcholesterol	adventitial_cell	0	0.87	0.74
UKB_460K.biochemistry_HbA1c	adventitial_cell	0	1	0.71
UKB_460K.biochemistry_LDLdirect	adventitial_cell	0	1	0.63
UKB_460K.biochemistry_SHBG	adventitial_cell	0	0.9	0.82
UKB_460K.biochemistry_Testosterone_Male	adventitial_cell	0	0.95	0.86
UKB_460K.biochemistry_TotalBilirubin	adventitial_cell	0	1	0.83
UKB_460K.biochemistry_TotalProtein	adventitial_cell	0	0.83	0.68
UKB_460K.biochemistry_Triglycerides	adventitial_cell	0	0.9	0.93
PASS_Type_1_Diabetes	adventitial_cell	0	0.8	0.57
PASS_Type_2_Diabetes	adventitial_cell	0	0.52	0.93
UKB_460K.bmd_HEEL_TSCOREz	adventitial_cell	0.083	0.02	0.34
UKB_460K.body_BALDING1	adventitial_cell	0.055	0.02	0.026
UKB_460K.body_HEIGHTz	adventitial_cell	0.021	0.02	0.085
UKB_460K.body_WHRadjBMIz	adventitial_cell	0.055	0.02	0.16
UKB_460K.cancer_BREAST	adventitial_cell	0	0.17	0.39
UKB_460K.impedance_BASAL_METABOLIC_RATEz	adventitial_cell	0	0.72	0.65
UKB_460K.lung_FEV1FVCzSMOKE	adventitial_cell	0.34	0.02	0.026
UKB_460K.lung_FVCzSMOKE	adventitial_cell	0.028	0.02	0.25
UKB_460K.pigment_HAIR	adventitial_cell	0.0035	0.74	0.7
UKB_460K.repro_MENARCHE_AGE	adventitial_cell	0	1	0.2
UKB_460K.repro_MENOPAUSE_AGE	adventitial_cell	0	1	0.79
PASS_CD_deLange2017	aortic_endothelial_cell	0	1	0.62
PASS_Celiac	aortic_endothelial_cell	0	1	0.39
PASS_IBD_deLange2017	aortic_endothelial_cell	0	1	0.98
PASS_Lupus	aortic_endothelial_cell	0	1	0.65
PASS_Multiple_sclerosis	aortic_endothelial_cell	0.0021	1	0.86
PASS_Primary_biliary_cirrhosis	aortic_endothelial_cell	0	1	0.5
PASS_Rheumatoid_Arthritis	aortic_endothelial_cell	0	1	0.87
PASS_UC_deLange2017	aortic_endothelial_cell	0	1	0.9
UKB_460K.blood_EOSINOPHIL_COUNT	aortic_endothelial_cell	0.0021	1	0.7
UKB_460K.blood_LYMPHOCYTE_COUNT	aortic_endothelial_cell	0.0021	0.77	0.16
UKB_460K.blood_MEAN_CORPUSCULAR_HEMOGLOBIN	aortic_endothelial_cell	0	1	0.95
UKB_460K.blood_MONOCYTE_COUNT	aortic_endothelial_cell	0.0043	0.9	0.35
UKB_460K.blood_PLATELET_COUNT	aortic_endothelial_cell	0	0.97	0.9
UKB_460K.blood_RBC_DISTRIB_WIDTH	aortic_endothelial_cell	0	1	0.56
UKB_460K.blood_RED_COUNT	aortic_endothelial_cell	0	0.84	0.68
UKB_460K.blood_WHITE_COUNT	aortic_endothelial_cell	0	1	0.55
UKB_460K.disease_AID_ALL	aortic_endothelial_cell	0	1	0.76
UKB_460K.disease_ALLERGY_ECZEMA_DIAGNOSED	aortic_endothelial_cell	0	1	0.77
UKB_460K.disease_ASTHMA_DIAGNOSED	aortic_endothelial_cell	0	1	0.84
UKB_460K.disease_HYPOTHYROIDISM_SELF_REP	aortic_endothelial_cell	0	1	0.65
UKB_460K.disease_RESPIRATORY_ENT	aortic_endothelial_cell	0	1	0.79
PASS_ADHD_Demontis2018	aortic_endothelial_cell	0	0.38	0.83
PASS_Alzheimers_Jansen2019	aortic_endothelial_cell	0	1	0.51
PASS_BIP_Stahl2019	aortic_endothelial_cell	0	1	0.56
PASS_DrinksPerWeek_Liu2019	aortic_endothelial_cell	0	0.9	0.94
PASS_GeneralRiskTolerance_KarlssonLinner2019	aortic_endothelial_cell	0	0.71	0.94
PASS_Insomnia_Jansen2019	aortic_endothelial_cell	0	1	0.89
PASS_Intelligence_SavageJansen2018	aortic_endothelial_cell	0	1	0.61
PASS_MDD_Howard2019	aortic_endothelial_cell	0.0021	0.78	0.97
PASS_ReactionTime_Davies2018	aortic_endothelial_cell	0.0043	0.17	0.47
PASS_SWB	aortic_endothelial_cell	0.011	0.21	0.44
PASS_Schizophrenia_Pardinas2018	aortic_endothelial_cell	0.0021	0.72	0.54
PASS_SleepDuration_Dashti2019	aortic_endothelial_cell	0	1	0.95
PASS_VerbalNumericReasoning_Davies2018	aortic_endothelial_cell	0	1	0.7
PASS_Worry_Nagel2018	aortic_endothelial_cell	0.0021	0.37	0.74
UKB_460K.body_BMIz	aortic_endothelial_cell	0	1	0.9
UKB_460K.cov_EDU_COLLEGE	aortic_endothelial_cell	0	1	0.48
UKB_460K.cov_EDU_YEARS	aortic_endothelial_cell	0	0.75	0.52
UKB_460K.cov_SMOKING_STATUS	aortic_endothelial_cell	0	0.95	0.9
UKB_460K.mental_NEUROTICISM	aortic_endothelial_cell	0.015	0.11	0.87
UKB_460K.other_MORNINGPERSON	aortic_endothelial_cell	0	0.71	0.7
UKB_460K.repro_NumberChildrenEverBorn_Pooled	aortic_endothelial_cell	0	0.49	0.72
PASS_AtrialFibrillation_Nielsen2018	aortic_endothelial_cell	0.0021	0.42	0.16
PASS_Coronary_Artery_Disease	aortic_endothelial_cell	0	0.55	0.97
UKB_460K.bp_DIASTOLICadjMEDz	aortic_endothelial_cell	0.011	0.02	0.026
UKB_460K.bp_SYSTOLICadjMEDz	aortic_endothelial_cell	0.0043	0.034	0.093
UKB_460K.disease_CARDIOVASCULAR	aortic_endothelial_cell	0	0.16	0.13
UKB_460K.disease_HYPERTENSION_DIAGNOSED	aortic_endothelial_cell	0.0021	0.32	0.36
PASS_FastingGlucose_Manning	aortic_endothelial_cell	0.0021	1	0.51
UKB_460K.biochemistry_AlanineAminotransferase	aortic_endothelial_cell	0	1	0.84
UKB_460K.biochemistry_AlkalinePhosphatase	aortic_endothelial_cell	0	0.84	0.89
UKB_460K.biochemistry_Cholesterol	aortic_endothelial_cell	0	0.65	0.81
UKB_460K.biochemistry_Glucose	aortic_endothelial_cell	0	1	0.9
UKB_460K.biochemistry_HDLcholesterol	aortic_endothelial_cell	0	0.24	0.53
UKB_460K.biochemistry_HbA1c	aortic_endothelial_cell	0	1	0.93
UKB_460K.biochemistry_LDLdirect	aortic_endothelial_cell	0	0.37	0.66
UKB_460K.biochemistry_SHBG	aortic_endothelial_cell	0.0043	0.34	0.55
UKB_460K.biochemistry_Testosterone_Male	aortic_endothelial_cell	0	0.97	0.49
UKB_460K.biochemistry_TotalBilirubin	aortic_endothelial_cell	0	0.77	0.63
UKB_460K.biochemistry_TotalProtein	aortic_endothelial_cell	0	0.65	0.11
UKB_460K.biochemistry_Triglycerides	aortic_endothelial_cell	0.0021	0.71	0.64
PASS_Type_1_Diabetes	aortic_endothelial_cell	0	0.91	0.12
PASS_Type_2_Diabetes	aortic_endothelial_cell	0.0043	0.046	0.27
UKB_460K.bmd_HEEL_TSCOREz	aortic_endothelial_cell	0.026	0.02	0.5
UKB_460K.body_BALDING1	aortic_endothelial_cell	0	1	0.82
UKB_460K.body_HEIGHTz	aortic_endothelial_cell	0	0.61	0.12
UKB_460K.body_WHRadjBMIz	aortic_endothelial_cell	0.032	0.02	0.039
UKB_460K.cancer_BREAST	aortic_endothelial_cell	0	0.91	0.99
UKB_460K.impedance_BASAL_METABOLIC_RATEz	aortic_endothelial_cell	0	0.96	0.4
UKB_460K.lung_FEV1FVCzSMOKE	aortic_endothelial_cell	0.032	0.11	0.94
UKB_460K.lung_FVCzSMOKE	aortic_endothelial_cell	0.0043	0.2	0.5
UKB_460K.pigment_HAIR	aortic_endothelial_cell	0.0021	0.99	0.68
UKB_460K.repro_MENARCHE_AGE	aortic_endothelial_cell	0	0.63	0.54
UKB_460K.repro_MENOPAUSE_AGE	aortic_endothelial_cell	0	0.86	0.33
PASS_CD_deLange2017	astrocyte	0	0.55	0.16
PASS_Celiac	astrocyte	0	0.98	0.75
PASS_IBD_deLange2017	astrocyte	0.0017	0.96	0.68
PASS_Lupus	astrocyte	0	1	0.3
PASS_Multiple_sclerosis	astrocyte	0	1	0.97
PASS_Primary_biliary_cirrhosis	astrocyte	0	0.79	0.13
PASS_Rheumatoid_Arthritis	astrocyte	0	0.97	0.26
PASS_UC_deLange2017	astrocyte	0	1	0.37
UKB_460K.blood_EOSINOPHIL_COUNT	astrocyte	0.0017	1	0.69
UKB_460K.blood_LYMPHOCYTE_COUNT	astrocyte	0	1	0.36
UKB_460K.blood_MEAN_CORPUSCULAR_HEMOGLOBIN	astrocyte	0	1	0.61
UKB_460K.blood_MONOCYTE_COUNT	astrocyte	0	1	0.72
UKB_460K.blood_PLATELET_COUNT	astrocyte	0	1	0.63
UKB_460K.blood_RBC_DISTRIB_WIDTH	astrocyte	0	0.23	0.66
UKB_460K.blood_RED_COUNT	astrocyte	0	0.91	0.63
UKB_460K.blood_WHITE_COUNT	astrocyte	0	1	0.6
UKB_460K.disease_AID_ALL	astrocyte	0	1	0.9
UKB_460K.disease_ALLERGY_ECZEMA_DIAGNOSED	astrocyte	0	1	0.51
UKB_460K.disease_ASTHMA_DIAGNOSED	astrocyte	0	0.9	0.37
UKB_460K.disease_HYPOTHYROIDISM_SELF_REP	astrocyte	0	1	0.63
UKB_460K.disease_RESPIRATORY_ENT	astrocyte	0	1	0.29
PASS_ADHD_Demontis2018	astrocyte	0	0.32	0.21
PASS_Alzheimers_Jansen2019	astrocyte	0	0.76	0.4
PASS_BIP_Stahl2019	astrocyte	0.0017	0.046	0.18
PASS_DrinksPerWeek_Liu2019	astrocyte	0	0.32	0.44
PASS_GeneralRiskTolerance_KarlssonLinner2019	astrocyte	0.01	0.077	0.4
PASS_Insomnia_Jansen2019	astrocyte	0.0068	0.12	0.13
PASS_Intelligence_SavageJansen2018	astrocyte	0.42	0.02	0.039
PASS_MDD_Howard2019	astrocyte	0.12	0.02	0.16
PASS_ReactionTime_Davies2018	astrocyte	0.066	0.02	0.1
PASS_SWB	astrocyte	0.37	0.02	0.026
PASS_Schizophrenia_Pardinas2018	astrocyte	0.2	0.02	0.05
PASS_SleepDuration_Dashti2019	astrocyte	0.034	0.046	0.2
PASS_VerbalNumericReasoning_Davies2018	astrocyte	0.14	0.034	0.085
PASS_Worry_Nagel2018	astrocyte	0.15	0.02	0.026
UKB_460K.body_BMIz	astrocyte	0.2	0.02	0.039
UKB_460K.cov_EDU_COLLEGE	astrocyte	0.41	0.02	0.026
UKB_460K.cov_EDU_YEARS	astrocyte	0.2	0.02	0.026
UKB_460K.cov_SMOKING_STATUS	astrocyte	0.041	0.046	0.14
UKB_460K.mental_NEUROTICISM	astrocyte	0.27	0.02	0.06
UKB_460K.other_MORNINGPERSON	astrocyte	0.0051	0.15	0.16
UKB_460K.repro_NumberChildrenEverBorn_Pooled	astrocyte	0.029	0.034	0.17
PASS_AtrialFibrillation_Nielsen2018	astrocyte	0	0.58	0.3
PASS_Coronary_Artery_Disease	astrocyte	0	0.43	0.2
UKB_460K.bp_DIASTOLICadjMEDz	astrocyte	0	1	0.28
UKB_460K.bp_SYSTOLICadjMEDz	astrocyte	0	0.79	0.43
UKB_460K.disease_CARDIOVASCULAR	astrocyte	0	1	0.92
UKB_460K.disease_HYPERTENSION_DIAGNOSED	astrocyte	0	1	0.47
PASS_FastingGlucose_Manning	astrocyte	0	0.73	0.61
UKB_460K.biochemistry_AlanineAminotransferase	astrocyte	0	1	0.69
UKB_460K.biochemistry_AlkalinePhosphatase	astrocyte	0	0.55	0.2
UKB_460K.biochemistry_Cholesterol	astrocyte	0	0.78	0.14
UKB_460K.biochemistry_Glucose	astrocyte	0	1	0.53
UKB_460K.biochemistry_HDLcholesterol	astrocyte	0	0.94	0.91
UKB_460K.biochemistry_HbA1c	astrocyte	0.0051	0.27	0.87
UKB_460K.biochemistry_LDLdirect	astrocyte	0.0017	0.54	0.48
UKB_460K.biochemistry_SHBG	astrocyte	0	0.46	0.8
UKB_460K.biochemistry_Testosterone_Male	astrocyte	0	0.52	0.34
UKB_460K.biochemistry_TotalBilirubin	astrocyte	0	1	0.93
UKB_460K.biochemistry_TotalProtein	astrocyte	0	1	0.66
UKB_460K.biochemistry_Triglycerides	astrocyte	0	1	0.87
PASS_Type_1_Diabetes	astrocyte	0	0.55	0.32
PASS_Type_2_Diabetes	astrocyte	0	1	0.96
UKB_460K.bmd_HEEL_TSCOREz	astrocyte	0.0017	0.83	0.52
UKB_460K.body_BALDING1	astrocyte	0	0.99	0.5
UKB_460K.body_HEIGHTz	astrocyte	0	0.98	0.88
UKB_460K.body_WHRadjBMIz	astrocyte	0	1	0.31
UKB_460K.cancer_BREAST	astrocyte	0	1	0.51
UKB_460K.impedance_BASAL_METABOLIC_RATEz	astrocyte	0.019	0.046	0.069
UKB_460K.lung_FEV1FVCzSMOKE	astrocyte	0.01	0.55	0.27
UKB_460K.lung_FVCzSMOKE	astrocyte	0	0.91	0.69
UKB_460K.pigment_HAIR	astrocyte	0	1	0.69
UKB_460K.repro_MENARCHE_AGE	astrocyte	0	0.46	0.5
UKB_460K.repro_MENOPAUSE_AGE	astrocyte	0	0.95	0.54
PASS_CD_deLange2017	atrial_myocyte	0	1	0.44
PASS_Celiac	atrial_myocyte	0	0.99	0.85
PASS_IBD_deLange2017	atrial_myocyte	0.005	0.91	0.32
PASS_Lupus	atrial_myocyte	0	1	0.8
PASS_Multiple_sclerosis	atrial_myocyte	0.0025	0.71	0.57
PASS_Primary_biliary_cirrhosis	atrial_myocyte	0	0.59	0.19
PASS_Rheumatoid_Arthritis	atrial_myocyte	0	1	0.92
PASS_UC_deLange2017	atrial_myocyte	0	0.95	0.43
UKB_460K.blood_EOSINOPHIL_COUNT	atrial_myocyte	0	1	0.58
UKB_460K.blood_LYMPHOCYTE_COUNT	atrial_myocyte	0.022	0.35	0.55
UKB_460K.blood_MEAN_CORPUSCULAR_HEMOGLOBIN	atrial_myocyte	0	0.2	0.21
UKB_460K.blood_MONOCYTE_COUNT	atrial_myocyte	0.03	0.44	0.44
UKB_460K.blood_PLATELET_COUNT	atrial_myocyte	0	0.22	0.21
UKB_460K.blood_RBC_DISTRIB_WIDTH	atrial_myocyte	0	1	0.57
UKB_460K.blood_RED_COUNT	atrial_myocyte	0	0.19	0.11
UKB_460K.blood_WHITE_COUNT	atrial_myocyte	0.02	0.22	0.12
UKB_460K.disease_AID_ALL	atrial_myocyte	0	1	0.58
UKB_460K.disease_ALLERGY_ECZEMA_DIAGNOSED	atrial_myocyte	0.0025	0.95	0.4
UKB_460K.disease_ASTHMA_DIAGNOSED	atrial_myocyte	0.0025	1	0.86
UKB_460K.disease_HYPOTHYROIDISM_SELF_REP	atrial_myocyte	0	1	0.57
UKB_460K.disease_RESPIRATORY_ENT	atrial_myocyte	0	1	0.93
PASS_ADHD_Demontis2018	atrial_myocyte	0	0.79	0.52
PASS_Alzheimers_Jansen2019	atrial_myocyte	0	0.89	0.83
PASS_BIP_Stahl2019	atrial_myocyte	0	0.28	0.25
PASS_DrinksPerWeek_Liu2019	atrial_myocyte	0	0.23	0.06
PASS_GeneralRiskTolerance_KarlssonLinner2019	atrial_myocyte	0	0.58	0.49
PASS_Insomnia_Jansen2019	atrial_myocyte	0	0.46	0.36
PASS_Intelligence_SavageJansen2018	atrial_myocyte	0	0.55	0.41
PASS_MDD_Howard2019	atrial_myocyte	0	1	0.79
PASS_ReactionTime_Davies2018	atrial_myocyte	0	0.8	0.59
PASS_SWB	atrial_myocyte	0.0025	0.95	0.57
PASS_Schizophrenia_Pardinas2018	atrial_myocyte	0	1	0.67
PASS_SleepDuration_Dashti2019	atrial_myocyte	0.005	0.35	0.11
PASS_VerbalNumericReasoning_Davies2018	atrial_myocyte	0.0074	0.26	0.17
PASS_Worry_Nagel2018	atrial_myocyte	0.0025	1	0.84
UKB_460K.body_BMIz	atrial_myocyte	0.005	0.79	0.4
UKB_460K.cov_EDU_COLLEGE	atrial_myocyte	0	0.77	0.54
UKB_460K.cov_EDU_YEARS	atrial_myocyte	0	0.7	0.62
UKB_460K.cov_SMOKING_STATUS	atrial_myocyte	0.0025	0.25	0.22
UKB_460K.mental_NEUROTICISM	atrial_myocyte	0	0.79	0.68
UKB_460K.other_MORNINGPERSON	atrial_myocyte	0	1	0.84
UKB_460K.repro_NumberChildrenEverBorn_Pooled	atrial_myocyte	0	1	0.8
PASS_AtrialFibrillation_Nielsen2018	atrial_myocyte	0.17	0.02	0.026
PASS_Coronary_Artery_Disease	atrial_myocyte	0	0.084	0.05
UKB_460K.bp_DIASTOLICadjMEDz	atrial_myocyte	0.057	0.067	0.039
UKB_460K.bp_SYSTOLICadjMEDz	atrial_myocyte	0.21	0.02	0.026
UKB_460K.disease_CARDIOVASCULAR	atrial_myocyte	0	0.16	0.069
UKB_460K.disease_HYPERTENSION_DIAGNOSED	atrial_myocyte	0	0.14	0.039
PASS_FastingGlucose_Manning	atrial_myocyte	0.16	0.057	0.039
UKB_460K.biochemistry_AlanineAminotransferase	atrial_myocyte	0	0.96	0.48
UKB_460K.biochemistry_AlkalinePhosphatase	atrial_myocyte	0	0.93	0.78
UKB_460K.biochemistry_Cholesterol	atrial_myocyte	0.0025	0.44	0.34
UKB_460K.biochemistry_Glucose	atrial_myocyte	0	0.7	0.81
UKB_460K.biochemistry_HDLcholesterol	atrial_myocyte	0.005	0.78	0.55
UKB_460K.biochemistry_HbA1c	atrial_myocyte	0.0025	0.9	0.81
UKB_460K.biochemistry_LDLdirect	atrial_myocyte	0.005	0.84	0.83
UKB_460K.biochemistry_SHBG	atrial_myocyte	0	1	0.85
UKB_460K.biochemistry_Testosterone_Male	atrial_myocyte	0	1	0.91
UKB_460K.biochemistry_TotalBilirubin	atrial_myocyte	0	1	0.83
UKB_460K.biochemistry_TotalProtein	atrial_myocyte	0	1	0.86
UKB_460K.biochemistry_Triglycerides	atrial_myocyte	0	1	0.63
PASS_Type_1_Diabetes	atrial_myocyte	0	1	0.57
PASS_Type_2_Diabetes	atrial_myocyte	0	0.32	0.45
UKB_460K.bmd_HEEL_TSCOREz	atrial_myocyte	0	1	0.57
UKB_460K.body_BALDING1	atrial_myocyte	0	0.96	0.83
UKB_460K.body_HEIGHTz	atrial_myocyte	0	0.99	0.81
UKB_460K.body_WHRadjBMIz	atrial_myocyte	0.0025	0.82	0.39
UKB_460K.cancer_BREAST	atrial_myocyte	0	0.84	0.67
UKB_460K.impedance_BASAL_METABOLIC_RATEz	atrial_myocyte	0	1	0.96
UKB_460K.lung_FEV1FVCzSMOKE	atrial_myocyte	0.0074	0.8	0.5
UKB_460K.lung_FVCzSMOKE	atrial_myocyte	0.0025	0.81	0.48
UKB_460K.pigment_HAIR	atrial_myocyte	0	0.83	0.68
UKB_460K.repro_MENARCHE_AGE	atrial_myocyte	0	0.44	0.093
UKB_460K.repro_MENOPAUSE_AGE	atrial_myocyte	0	0.6	0.6
PASS_CD_deLange2017	basal_cell	0.0014	0.78	0.31
PASS_Celiac	basal_cell	0	1	0.039
PASS_IBD_deLange2017	basal_cell	0.00094	0.73	0.19
PASS_Lupus	basal_cell	0	0.8	0.83
PASS_Multiple_sclerosis	basal_cell	0	1	0.91
PASS_Primary_biliary_cirrhosis	basal_cell	0	1	0.46
PASS_Rheumatoid_Arthritis	basal_cell	0.00047	1	0.11
PASS_UC_deLange2017	basal_cell	0.00047	0.99	0.19
UKB_460K.blood_EOSINOPHIL_COUNT	basal_cell	0.00047	0.9	0.26
UKB_460K.blood_LYMPHOCYTE_COUNT	basal_cell	0	1	0.38
UKB_460K.blood_MEAN_CORPUSCULAR_HEMOGLOBIN	basal_cell	0	1	0.3
UKB_460K.blood_MONOCYTE_COUNT	basal_cell	0	1	0.29
UKB_460K.blood_PLATELET_COUNT	basal_cell	0	1	0.87
UKB_460K.blood_RBC_DISTRIB_WIDTH	basal_cell	0	1	0.32
UKB_460K.blood_RED_COUNT	basal_cell	0	0.91	0.71
UKB_460K.blood_WHITE_COUNT	basal_cell	0.00094	0.74	0.56
UKB_460K.disease_AID_ALL	basal_cell	0	1	0.5
UKB_460K.disease_ALLERGY_ECZEMA_DIAGNOSED	basal_cell	0.012	0.19	0.62
UKB_460K.disease_ASTHMA_DIAGNOSED	basal_cell	0.0075	0.2	0.24
UKB_460K.disease_HYPOTHYROIDISM_SELF_REP	basal_cell	0	1	0.67
UKB_460K.disease_RESPIRATORY_ENT	basal_cell	0.0028	0.58	0.38
PASS_ADHD_Demontis2018	basal_cell	0	0.49	0.52
PASS_Alzheimers_Jansen2019	basal_cell	0	0.4	0.97
PASS_BIP_Stahl2019	basal_cell	0	1	0.2
PASS_DrinksPerWeek_Liu2019	basal_cell	0	0.47	0.085
PASS_GeneralRiskTolerance_KarlssonLinner2019	basal_cell	0.00047	0.4	0.33
PASS_Insomnia_Jansen2019	basal_cell	0	0.72	0.57
PASS_Intelligence_SavageJansen2018	basal_cell	0	0.8	0.05
PASS_MDD_Howard2019	basal_cell	0.027	0.02	0.11
PASS_ReactionTime_Davies2018	basal_cell	0.0051	0.11	0.06
PASS_SWB	basal_cell	0.0023	0.36	0.18
PASS_Schizophrenia_Pardinas2018	basal_cell	0.00047	0.97	0.18
PASS_SleepDuration_Dashti2019	basal_cell	0.0084	0.15	0.1
PASS_VerbalNumericReasoning_Davies2018	basal_cell	0.00047	0.61	0.026
PASS_Worry_Nagel2018	basal_cell	0.0028	0.32	0.11
UKB_460K.body_BMIz	basal_cell	0.0014	0.65	0.26
UKB_460K.cov_EDU_COLLEGE	basal_cell	0.0014	0.89	0.21
UKB_460K.cov_EDU_YEARS	basal_cell	0.00094	0.78	0.085
UKB_460K.cov_SMOKING_STATUS	basal_cell	0	0.9	0.24
UKB_460K.mental_NEUROTICISM	basal_cell	0.0098	0.21	0.35
UKB_460K.other_MORNINGPERSON	basal_cell	0.00047	0.67	0.026
UKB_460K.repro_NumberChildrenEverBorn_Pooled	basal_cell	0	0.81	0.11
PASS_AtrialFibrillation_Nielsen2018	basal_cell	0	0.89	0.37
PASS_Coronary_Artery_Disease	basal_cell	0	0.73	0.069
UKB_460K.bp_DIASTOLICadjMEDz	basal_cell	0	0.4	0.38
UKB_460K.bp_SYSTOLICadjMEDz	basal_cell	0.00047	0.44	0.48
UKB_460K.disease_CARDIOVASCULAR	basal_cell	0	0.72	0.61
UKB_460K.disease_HYPERTENSION_DIAGNOSED	basal_cell	0	0.87	0.44
PASS_FastingGlucose_Manning	basal_cell	0	1	0.27
UKB_460K.biochemistry_AlanineAminotransferase	basal_cell	0	0.85	0.026
UKB_460K.biochemistry_AlkalinePhosphatase	basal_cell	0.00047	0.9	0.05
UKB_460K.biochemistry_Cholesterol	basal_cell	0.0014	0.63	0.63
UKB_460K.biochemistry_Glucose	basal_cell	0	1	0.11
UKB_460K.biochemistry_HDLcholesterol	basal_cell	0	0.87	0.35
UKB_460K.biochemistry_HbA1c	basal_cell	0	1	0.05
UKB_460K.biochemistry_LDLdirect	basal_cell	0.00047	0.77	0.38
UKB_460K.biochemistry_SHBG	basal_cell	0	1	0.56
UKB_460K.biochemistry_Testosterone_Male	basal_cell	0	1	0.54
UKB_460K.biochemistry_TotalBilirubin	basal_cell	0	1	0.026
UKB_460K.biochemistry_TotalProtein	basal_cell	0	1	0.42
UKB_460K.biochemistry_Triglycerides	basal_cell	0	0.88	0.47
PASS_Type_1_Diabetes	basal_cell	0	1	0.79
PASS_Type_2_Diabetes	basal_cell	0	1	1
UKB_460K.bmd_HEEL_TSCOREz	basal_cell	0.0094	0.22	0.026
UKB_460K.body_BALDING1	basal_cell	0.0089	0.046	0.37
UKB_460K.body_HEIGHTz	basal_cell	0.0019	0.4	0.33
UKB_460K.body_WHRadjBMIz	basal_cell	0.00047	1	0.069
UKB_460K.cancer_BREAST	basal_cell	0	0.95	0.29
UKB_460K.impedance_BASAL_METABOLIC_RATEz	basal_cell	0.00047	0.82	0.05
UKB_460K.lung_FEV1FVCzSMOKE	basal_cell	0.23	0.02	0.05
UKB_460K.lung_FVCzSMOKE	basal_cell	0.00047	0.73	0.039
UKB_460K.pigment_HAIR	basal_cell	0.0037	0.33	0.57
UKB_460K.repro_MENARCHE_AGE	basal_cell	0	0.91	0.12
UKB_460K.repro_MENOPAUSE_AGE	basal_cell	0	1	0.6
PASS_CD_deLange2017	basal_cell_of_epidermis	0	1	0.039
PASS_Celiac	basal_cell_of_epidermis	0	1	0.52
PASS_IBD_deLange2017	basal_cell_of_epidermis	0.00024	1	0.34
PASS_Lupus	basal_cell_of_epidermis	0	0.25	0.35
PASS_Multiple_sclerosis	basal_cell_of_epidermis	0.00024	0.98	0.18
PASS_Primary_biliary_cirrhosis	basal_cell_of_epidermis	0	0.61	0.64
PASS_Rheumatoid_Arthritis	basal_cell_of_epidermis	0	1	0.29
PASS_UC_deLange2017	basal_cell_of_epidermis	0	0.8	0.22
UKB_460K.blood_EOSINOPHIL_COUNT	basal_cell_of_epidermis	0.0062	0.48	0.06
UKB_460K.blood_LYMPHOCYTE_COUNT	basal_cell_of_epidermis	0	1	0.54
UKB_460K.blood_MEAN_CORPUSCULAR_HEMOGLOBIN	basal_cell_of_epidermis	0	1	0.66
UKB_460K.blood_MONOCYTE_COUNT	basal_cell_of_epidermis	0.00071	1	0.48
UKB_460K.blood_PLATELET_COUNT	basal_cell_of_epidermis	0	1	0.89
UKB_460K.blood_RBC_DISTRIB_WIDTH	basal_cell_of_epidermis	0.00024	0.61	0.16
UKB_460K.blood_RED_COUNT	basal_cell_of_epidermis	0	1	0.48
UKB_460K.blood_WHITE_COUNT	basal_cell_of_epidermis	0	1	0.78
UKB_460K.disease_AID_ALL	basal_cell_of_epidermis	0.00024	1	0.19
UKB_460K.disease_ALLERGY_ECZEMA_DIAGNOSED	basal_cell_of_epidermis	0.015	0.093	0.11
UKB_460K.disease_ASTHMA_DIAGNOSED	basal_cell_of_epidermis	0.0076	0.19	0.19
UKB_460K.disease_HYPOTHYROIDISM_SELF_REP	basal_cell_of_epidermis	0.00095	1	0.19
UKB_460K.disease_RESPIRATORY_ENT	basal_cell_of_epidermis	0.0064	0.24	0.13
PASS_ADHD_Demontis2018	basal_cell_of_epidermis	0	0.89	0.23
PASS_Alzheimers_Jansen2019	basal_cell_of_epidermis	0	0.91	0.7
PASS_BIP_Stahl2019	basal_cell_of_epidermis	0	0.95	0.77
PASS_DrinksPerWeek_Liu2019	basal_cell_of_epidermis	0	1	0.92
PASS_GeneralRiskTolerance_KarlssonLinner2019	basal_cell_of_epidermis	0	0.71	0.2
PASS_Insomnia_Jansen2019	basal_cell_of_epidermis	0.00024	1	0.94
PASS_Intelligence_SavageJansen2018	basal_cell_of_epidermis	0.0031	0.55	0.48
PASS_MDD_Howard2019	basal_cell_of_epidermis	0.00024	0.92	0.12
PASS_ReactionTime_Davies2018	basal_cell_of_epidermis	0.00095	0.3	0.3
PASS_SWB	basal_cell_of_epidermis	0	1	0.49
PASS_Schizophrenia_Pardinas2018	basal_cell_of_epidermis	0.00047	1	0.43
PASS_SleepDuration_Dashti2019	basal_cell_of_epidermis	0.00071	0.58	0.039
PASS_VerbalNumericReasoning_Davies2018	basal_cell_of_epidermis	0	1	0.47
PASS_Worry_Nagel2018	basal_cell_of_epidermis	0	1	0.42
UKB_460K.body_BMIz	basal_cell_of_epidermis	0.0017	0.8	0.73
UKB_460K.cov_EDU_COLLEGE	basal_cell_of_epidermis	0.0038	0.33	0.56
UKB_460K.cov_EDU_YEARS	basal_cell_of_epidermis	0.0014	0.49	0.29
UKB_460K.cov_SMOKING_STATUS	basal_cell_of_epidermis	0.00071	0.61	0.043
UKB_460K.mental_NEUROTICISM	basal_cell_of_epidermis	0	1	0.61
UKB_460K.other_MORNINGPERSON	basal_cell_of_epidermis	0	1	0.33
UKB_460K.repro_NumberChildrenEverBorn_Pooled	basal_cell_of_epidermis	0.00047	0.59	0.54
PASS_AtrialFibrillation_Nielsen2018	basal_cell_of_epidermis	0	1	0.55
PASS_Coronary_Artery_Disease	basal_cell_of_epidermis	0	1	0.7
UKB_460K.bp_DIASTOLICadjMEDz	basal_cell_of_epidermis	0	0.9	0.23
UKB_460K.bp_SYSTOLICadjMEDz	basal_cell_of_epidermis	0	0.9	0.62
UKB_460K.disease_CARDIOVASCULAR	basal_cell_of_epidermis	0	1	0.16
UKB_460K.disease_HYPERTENSION_DIAGNOSED	basal_cell_of_epidermis	0	1	0.2
PASS_FastingGlucose_Manning	basal_cell_of_epidermis	0.00047	1	0.6
UKB_460K.biochemistry_AlanineAminotransferase	basal_cell_of_epidermis	0	0.99	0.62
UKB_460K.biochemistry_AlkalinePhosphatase	basal_cell_of_epidermis	0	1	0.23
UKB_460K.biochemistry_Cholesterol	basal_cell_of_epidermis	0.0017	0.78	0.89
UKB_460K.biochemistry_Glucose	basal_cell_of_epidermis	0.00095	0.73	0.27
UKB_460K.biochemistry_HDLcholesterol	basal_cell_of_epidermis	0.00024	0.7	0.48
UKB_460K.biochemistry_HbA1c	basal_cell_of_epidermis	0	1	0.89
UKB_460K.biochemistry_LDLdirect	basal_cell_of_epidermis	0.00047	0.67	0.9
UKB_460K.biochemistry_SHBG	basal_cell_of_epidermis	0	0.64	0.54
UKB_460K.biochemistry_Testosterone_Male	basal_cell_of_epidermis	0	0.82	0.23
UKB_460K.biochemistry_TotalBilirubin	basal_cell_of_epidermis	0	0.95	0.24
UKB_460K.biochemistry_TotalProtein	basal_cell_of_epidermis	0	0.95	0.71
UKB_460K.biochemistry_Triglycerides	basal_cell_of_epidermis	0.00047	0.83	0.13
PASS_Type_1_Diabetes	basal_cell_of_epidermis	0	1	0.72
PASS_Type_2_Diabetes	basal_cell_of_epidermis	0	1	0.13
UKB_460K.bmd_HEEL_TSCOREz	basal_cell_of_epidermis	0.0057	0.28	0.026
UKB_460K.body_BALDING1	basal_cell_of_epidermis	0.0047	0.057	0.0019
UKB_460K.body_HEIGHTz	basal_cell_of_epidermis	0	1	0.6
UKB_460K.body_WHRadjBMIz	basal_cell_of_epidermis	0.00071	1	0.63
UKB_460K.cancer_BREAST	basal_cell_of_epidermis	0	0.81	0.43
UKB_460K.impedance_BASAL_METABOLIC_RATEz	basal_cell_of_epidermis	0.00047	0.97	0.53
UKB_460K.lung_FEV1FVCzSMOKE	basal_cell_of_epidermis	0.023	0.27	0.014
UKB_460K.lung_FVCzSMOKE	basal_cell_of_epidermis	0.00024	0.82	0.06
UKB_460K.pigment_HAIR	basal_cell_of_epidermis	0.079	0.02	0.07
UKB_460K.repro_MENARCHE_AGE	basal_cell_of_epidermis	0.00071	0.62	0.063
UKB_460K.repro_MENOPAUSE_AGE	basal_cell_of_epidermis	0	0.98	0.61
PASS_CD_deLange2017	basal_epithelial_cell_of_tracheobronchial_tree	0	1	0.34
PASS_Celiac	basal_epithelial_cell_of_tracheobronchial_tree	0	1	0.82
PASS_IBD_deLange2017	basal_epithelial_cell_of_tracheobronchial_tree	0	1	0.8
PASS_Lupus	basal_epithelial_cell_of_tracheobronchial_tree	0	1	0.81
PASS_Multiple_sclerosis	basal_epithelial_cell_of_tracheobronchial_tree	0	1	0.73
PASS_Primary_biliary_cirrhosis	basal_epithelial_cell_of_tracheobronchial_tree	0	1	0.34
PASS_Rheumatoid_Arthritis	basal_epithelial_cell_of_tracheobronchial_tree	0	1	0.21
PASS_UC_deLange2017	basal_epithelial_cell_of_tracheobronchial_tree	0	1	0.89
UKB_460K.blood_EOSINOPHIL_COUNT	basal_epithelial_cell_of_tracheobronchial_tree	0	1	0.27
UKB_460K.blood_LYMPHOCYTE_COUNT	basal_epithelial_cell_of_tracheobronchial_tree	0	1	0.64
UKB_460K.blood_MEAN_CORPUSCULAR_HEMOGLOBIN	basal_epithelial_cell_of_tracheobronchial_tree	0	0.8	0.6
UKB_460K.blood_MONOCYTE_COUNT	basal_epithelial_cell_of_tracheobronchial_tree	0	1	0.85
UKB_460K.blood_PLATELET_COUNT	basal_epithelial_cell_of_tracheobronchial_tree	0	0.91	0.83
UKB_460K.blood_RBC_DISTRIB_WIDTH	basal_epithelial_cell_of_tracheobronchial_tree	0	0.96	0.83
UKB_460K.blood_RED_COUNT	basal_epithelial_cell_of_tracheobronchial_tree	0	1	0.5
UKB_460K.blood_WHITE_COUNT	basal_epithelial_cell_of_tracheobronchial_tree	0	1	0.6
UKB_460K.disease_AID_ALL	basal_epithelial_cell_of_tracheobronchial_tree	0	1	0.24
UKB_460K.disease_ALLERGY_ECZEMA_DIAGNOSED	basal_epithelial_cell_of_tracheobronchial_tree	0.0025	1	0.069
UKB_460K.disease_ASTHMA_DIAGNOSED	basal_epithelial_cell_of_tracheobronchial_tree	0	0.99	0.16
UKB_460K.disease_HYPOTHYROIDISM_SELF_REP	basal_epithelial_cell_of_tracheobronchial_tree	0	1	0.17
UKB_460K.disease_RESPIRATORY_ENT	basal_epithelial_cell_of_tracheobronchial_tree	0.0025	1	0.51
PASS_ADHD_Demontis2018	basal_epithelial_cell_of_tracheobronchial_tree	0	0.77	0.43
PASS_Alzheimers_Jansen2019	basal_epithelial_cell_of_tracheobronchial_tree	0.0025	1	0.77
PASS_BIP_Stahl2019	basal_epithelial_cell_of_tracheobronchial_tree	0	1	0.69
PASS_DrinksPerWeek_Liu2019	basal_epithelial_cell_of_tracheobronchial_tree	0	1	0.45
PASS_GeneralRiskTolerance_KarlssonLinner2019	basal_epithelial_cell_of_tracheobronchial_tree	0	0.92	0.48
PASS_Insomnia_Jansen2019	basal_epithelial_cell_of_tracheobronchial_tree	0.005	0.72	0.89
PASS_Intelligence_SavageJansen2018	basal_epithelial_cell_of_tracheobronchial_tree	0.0025	0.45	0.79
PASS_MDD_Howard2019	basal_epithelial_cell_of_tracheobronchial_tree	0	0.91	0.17
PASS_ReactionTime_Davies2018	basal_epithelial_cell_of_tracheobronchial_tree	0.0025	0.75	0.33
PASS_SWB	basal_epithelial_cell_of_tracheobronchial_tree	0	0.77	0.18
PASS_Schizophrenia_Pardinas2018	basal_epithelial_cell_of_tracheobronchial_tree	0.005	1	0.26
PASS_SleepDuration_Dashti2019	basal_epithelial_cell_of_tracheobronchial_tree	0	1	0.34
PASS_VerbalNumericReasoning_Davies2018	basal_epithelial_cell_of_tracheobronchial_tree	0	0.86	0.77
PASS_Worry_Nagel2018	basal_epithelial_cell_of_tracheobronchial_tree	0.005	0.78	0.17
UKB_460K.body_BMIz	basal_epithelial_cell_of_tracheobronchial_tree	0.0025	1	0.7
UKB_460K.cov_EDU_COLLEGE	basal_epithelial_cell_of_tracheobronchial_tree	0.0099	0.52	0.57
UKB_460K.cov_EDU_YEARS	basal_epithelial_cell_of_tracheobronchial_tree	0.005	0.52	0.12
UKB_460K.cov_SMOKING_STATUS	basal_epithelial_cell_of_tracheobronchial_tree	0	0.68	0.89
UKB_460K.mental_NEUROTICISM	basal_epithelial_cell_of_tracheobronchial_tree	0	0.88	0.41
UKB_460K.other_MORNINGPERSON	basal_epithelial_cell_of_tracheobronchial_tree	0.005	0.74	0.17
UKB_460K.repro_NumberChildrenEverBorn_Pooled	basal_epithelial_cell_of_tracheobronchial_tree	0.005	0.14	0.2
PASS_AtrialFibrillation_Nielsen2018	basal_epithelial_cell_of_tracheobronchial_tree	0	1	0.85
PASS_Coronary_Artery_Disease	basal_epithelial_cell_of_tracheobronchial_tree	0	0.71	0.82
UKB_460K.bp_DIASTOLICadjMEDz	basal_epithelial_cell_of_tracheobronchial_tree	0	0.95	0.52
UKB_460K.bp_SYSTOLICadjMEDz	basal_epithelial_cell_of_tracheobronchial_tree	0	0.91	0.56
UKB_460K.disease_CARDIOVASCULAR	basal_epithelial_cell_of_tracheobronchial_tree	0	1	0.28
UKB_460K.disease_HYPERTENSION_DIAGNOSED	basal_epithelial_cell_of_tracheobronchial_tree	0	1	0.33
PASS_FastingGlucose_Manning	basal_epithelial_cell_of_tracheobronchial_tree	0	0.55	0.24
UKB_460K.biochemistry_AlanineAminotransferase	basal_epithelial_cell_of_tracheobronchial_tree	0	0.47	0.72
UKB_460K.biochemistry_AlkalinePhosphatase	basal_epithelial_cell_of_tracheobronchial_tree	0	0.47	0.29
UKB_460K.biochemistry_Cholesterol	basal_epithelial_cell_of_tracheobronchial_tree	0.0025	1	0.84
UKB_460K.biochemistry_Glucose	basal_epithelial_cell_of_tracheobronchial_tree	0.005	0.84	0.34
UKB_460K.biochemistry_HDLcholesterol	basal_epithelial_cell_of_tracheobronchial_tree	0	0.94	0.89
UKB_460K.biochemistry_HbA1c	basal_epithelial_cell_of_tracheobronchial_tree	0.005	0.73	0.68
UKB_460K.biochemistry_LDLdirect	basal_epithelial_cell_of_tracheobronchial_tree	0.0025	0.93	0.8
UKB_460K.biochemistry_SHBG	basal_epithelial_cell_of_tracheobronchial_tree	0	0.52	0.87
UKB_460K.biochemistry_Testosterone_Male	basal_epithelial_cell_of_tracheobronchial_tree	0	0.9	0.65
UKB_460K.biochemistry_TotalBilirubin	basal_epithelial_cell_of_tracheobronchial_tree	0	0.66	0.37
UKB_460K.biochemistry_TotalProtein	basal_epithelial_cell_of_tracheobronchial_tree	0	1	0.35
UKB_460K.biochemistry_Triglycerides	basal_epithelial_cell_of_tracheobronchial_tree	0	0.87	0.67
PASS_Type_1_Diabetes	basal_epithelial_cell_of_tracheobronchial_tree	0	1	0.9
PASS_Type_2_Diabetes	basal_epithelial_cell_of_tracheobronchial_tree	0.0025	0.72	0.11
UKB_460K.bmd_HEEL_TSCOREz	basal_epithelial_cell_of_tracheobronchial_tree	0.005	0.55	0.56
UKB_460K.body_BALDING1	basal_epithelial_cell_of_tracheobronchial_tree	0.0025	0.37	0.14
UKB_460K.body_HEIGHTz	basal_epithelial_cell_of_tracheobronchial_tree	0.005	0.63	0.57
UKB_460K.body_WHRadjBMIz	basal_epithelial_cell_of_tracheobronchial_tree	0.012	0.65	0.77
UKB_460K.cancer_BREAST	basal_epithelial_cell_of_tracheobronchial_tree	0.0074	0.19	0.63
UKB_460K.impedance_BASAL_METABOLIC_RATEz	basal_epithelial_cell_of_tracheobronchial_tree	0	0.7	0.53
UKB_460K.lung_FEV1FVCzSMOKE	basal_epithelial_cell_of_tracheobronchial_tree	0.027	0.43	0.68
UKB_460K.lung_FVCzSMOKE	basal_epithelial_cell_of_tracheobronchial_tree	0.0025	0.78	0.88
UKB_460K.pigment_HAIR	basal_epithelial_cell_of_tracheobronchial_tree	0.05	0.057	0.52
UKB_460K.repro_MENARCHE_AGE	basal_epithelial_cell_of_tracheobronchial_tree	0	0.8	0.28
UKB_460K.repro_MENOPAUSE_AGE	basal_epithelial_cell_of_tracheobronchial_tree	0	1	0.48
PASS_CD_deLange2017	basophil	0.028	0.23	0.039
PASS_Celiac	basophil	0	0.21	0.84
PASS_IBD_deLange2017	basophil	0.014	0.2	0.076
PASS_Lupus	basophil	0	0.52	0.32
PASS_Multiple_sclerosis	basophil	0.042	0.17	0.19
PASS_Primary_biliary_cirrhosis	basophil	0	0.36	0.37
PASS_Rheumatoid_Arthritis	basophil	0.25	0.034	0.18
PASS_UC_deLange2017	basophil	0	0.2	0.13
UKB_460K.blood_EOSINOPHIL_COUNT	basophil	0.32	0.02	0.026
UKB_460K.blood_LYMPHOCYTE_COUNT	basophil	0.23	0.046	0.026
UKB_460K.blood_MEAN_CORPUSCULAR_HEMOGLOBIN	basophil	0	0.4	0.23
UKB_460K.blood_MONOCYTE_COUNT	basophil	0.28	0.034	0.34
UKB_460K.blood_PLATELET_COUNT	basophil	0	0.68	0.9
UKB_460K.blood_RBC_DISTRIB_WIDTH	basophil	0	0.68	0.7
UKB_460K.blood_RED_COUNT	basophil	0	0.47	0.37
UKB_460K.blood_WHITE_COUNT	basophil	0	0.28	0.05
UKB_460K.disease_AID_ALL	basophil	0	0.41	0.069
UKB_460K.disease_ALLERGY_ECZEMA_DIAGNOSED	basophil	0.014	0.58	0.12
UKB_460K.disease_ASTHMA_DIAGNOSED	basophil	0.085	0.077	0.05
UKB_460K.disease_HYPOTHYROIDISM_SELF_REP	basophil	0.056	0.23	0.026
UKB_460K.disease_RESPIRATORY_ENT	basophil	0.042	0.18	0.21
PASS_ADHD_Demontis2018	basophil	0	1	0.82
PASS_Alzheimers_Jansen2019	basophil	0	0.27	0.81
PASS_BIP_Stahl2019	basophil	0	1	0.95
PASS_DrinksPerWeek_Liu2019	basophil	0	0.61	0.65
PASS_GeneralRiskTolerance_KarlssonLinner2019	basophil	0	1	0.29
PASS_Insomnia_Jansen2019	basophil	0	0.99	0.81
PASS_Intelligence_SavageJansen2018	basophil	0	0.99	0.97
PASS_MDD_Howard2019	basophil	0	1	0.96
PASS_ReactionTime_Davies2018	basophil	0	1	0.89
PASS_SWB	basophil	0	1	0.6
PASS_Schizophrenia_Pardinas2018	basophil	0	1	0.58
PASS_SleepDuration_Dashti2019	basophil	0	1	0.27
PASS_VerbalNumericReasoning_Davies2018	basophil	0	1	0.95
PASS_Worry_Nagel2018	basophil	0	0.44	0.36
UKB_460K.body_BMIz	basophil	0	1	0.8
UKB_460K.cov_EDU_COLLEGE	basophil	0	1	0.96
UKB_460K.cov_EDU_YEARS	basophil	0	0.96	1
UKB_460K.cov_SMOKING_STATUS	basophil	0	1	0.73
UKB_460K.mental_NEUROTICISM	basophil	0	1	0.96
UKB_460K.other_MORNINGPERSON	basophil	0	0.96	0.68
UKB_460K.repro_NumberChildrenEverBorn_Pooled	basophil	0	0.91	0.97
PASS_AtrialFibrillation_Nielsen2018	basophil	0	0.63	0.73
PASS_Coronary_Artery_Disease	basophil	0	0.99	0.23
UKB_460K.bp_DIASTOLICadjMEDz	basophil	0	1	0.26
UKB_460K.bp_SYSTOLICadjMEDz	basophil	0.014	1	0.21
UKB_460K.disease_CARDIOVASCULAR	basophil	0	0.33	0.14
UKB_460K.disease_HYPERTENSION_DIAGNOSED	basophil	0	0.98	0.35
PASS_FastingGlucose_Manning	basophil	0	0.97	0.8
UKB_460K.biochemistry_AlanineAminotransferase	basophil	0	0.93	0.83
UKB_460K.biochemistry_AlkalinePhosphatase	basophil	0	1	0.38
UKB_460K.biochemistry_Cholesterol	basophil	0	0.58	0.61
UKB_460K.biochemistry_Glucose	basophil	0	1	0.57
UKB_460K.biochemistry_HDLcholesterol	basophil	0	0.73	0.24
UKB_460K.biochemistry_HbA1c	basophil	0	0.97	0.94
UKB_460K.biochemistry_LDLdirect	basophil	0	1	0.36
UKB_460K.biochemistry_SHBG	basophil	0	1	0.54
UKB_460K.biochemistry_Testosterone_Male	basophil	0	0.97	0.89
UKB_460K.biochemistry_TotalBilirubin	basophil	0	1	0.81
UKB_460K.biochemistry_TotalProtein	basophil	0	0.55	0.2
UKB_460K.biochemistry_Triglycerides	basophil	0	0.97	0.62
PASS_Type_1_Diabetes	basophil	0	1	0.55
PASS_Type_2_Diabetes	basophil	0	0.77	0.36
UKB_460K.bmd_HEEL_TSCOREz	basophil	0	1	0.68
UKB_460K.body_BALDING1	basophil	0	1	0.82
UKB_460K.body_HEIGHTz	basophil	0	1	0.94
UKB_460K.body_WHRadjBMIz	basophil	0	1	0.73
UKB_460K.cancer_BREAST	basophil	0	0.88	0.89
UKB_460K.impedance_BASAL_METABOLIC_RATEz	basophil	0	1	0.64
UKB_460K.lung_FEV1FVCzSMOKE	basophil	0	1	0.32
UKB_460K.lung_FVCzSMOKE	basophil	0	1	0.26
UKB_460K.pigment_HAIR	basophil	0	1	0.61
UKB_460K.repro_MENARCHE_AGE	basophil	0	1	0.39
UKB_460K.repro_MENOPAUSE_AGE	basophil	0	0.61	0.4
PASS_CD_deLange2017	bladder_cell	0.018	0.034	0.026
PASS_Celiac	bladder_cell	0	0.9	0.44
PASS_IBD_deLange2017	bladder_cell	0.002	0.35	0.12
PASS_Lupus	bladder_cell	0	1	0.34
PASS_Multiple_sclerosis	bladder_cell	0	1	0.94
PASS_Primary_biliary_cirrhosis	bladder_cell	0	1	0.4
PASS_Rheumatoid_Arthritis	bladder_cell	0.00099	0.91	0.06
PASS_UC_deLange2017	bladder_cell	0.00099	0.17	0.085
UKB_460K.blood_EOSINOPHIL_COUNT	bladder_cell	0	1	0.35
UKB_460K.blood_LYMPHOCYTE_COUNT	bladder_cell	0	1	0.56
UKB_460K.blood_MEAN_CORPUSCULAR_HEMOGLOBIN	bladder_cell	0	1	0.81
UKB_460K.blood_MONOCYTE_COUNT	bladder_cell	0	1	0.58
UKB_460K.blood_PLATELET_COUNT	bladder_cell	0	1	0.61
UKB_460K.blood_RBC_DISTRIB_WIDTH	bladder_cell	0	1	0.76
UKB_460K.blood_RED_COUNT	bladder_cell	0	1	0.69
UKB_460K.blood_WHITE_COUNT	bladder_cell	0	0.98	0.44
UKB_460K.disease_AID_ALL	bladder_cell	0	1	0.29
UKB_460K.disease_ALLERGY_ECZEMA_DIAGNOSED	bladder_cell	0.002	0.64	0.093
UKB_460K.disease_ASTHMA_DIAGNOSED	bladder_cell	0.013	0.16	0.039
UKB_460K.disease_HYPOTHYROIDISM_SELF_REP	bladder_cell	0	1	0.71
UKB_460K.disease_RESPIRATORY_ENT	bladder_cell	0.002	0.52	0.19
PASS_ADHD_Demontis2018	bladder_cell	0	1	0.93
PASS_Alzheimers_Jansen2019	bladder_cell	0	1	0.86
PASS_BIP_Stahl2019	bladder_cell	0	1	0.75
PASS_DrinksPerWeek_Liu2019	bladder_cell	0	0.74	0.91
PASS_GeneralRiskTolerance_KarlssonLinner2019	bladder_cell	0	0.84	0.55
PASS_Insomnia_Jansen2019	bladder_cell	0.014	0.02	0.026
PASS_Intelligence_SavageJansen2018	bladder_cell	0	0.95	0.39
PASS_MDD_Howard2019	bladder_cell	0	0.74	0.44
PASS_ReactionTime_Davies2018	bladder_cell	0	1	0.81
PASS_SWB	bladder_cell	0	0.84	0.56
PASS_Schizophrenia_Pardinas2018	bladder_cell	0	0.71	0.73
PASS_SleepDuration_Dashti2019	bladder_cell	0	1	0.61
PASS_VerbalNumericReasoning_Davies2018	bladder_cell	0	0.91	0.71
PASS_Worry_Nagel2018	bladder_cell	0	0.79	0.8
UKB_460K.body_BMIz	bladder_cell	0.00099	0.76	0.87
UKB_460K.cov_EDU_COLLEGE	bladder_cell	0	1	0.89
UKB_460K.cov_EDU_YEARS	bladder_cell	0	1	0.72
UKB_460K.cov_SMOKING_STATUS	bladder_cell	0	0.58	0.78
UKB_460K.mental_NEUROTICISM	bladder_cell	0.003	0.71	0.94
UKB_460K.other_MORNINGPERSON	bladder_cell	0	0.58	0.77
UKB_460K.repro_NumberChildrenEverBorn_Pooled	bladder_cell	0	0.96	0.77
PASS_AtrialFibrillation_Nielsen2018	bladder_cell	0	1	0.4
PASS_Coronary_Artery_Disease	bladder_cell	0	0.53	0.79
UKB_460K.bp_DIASTOLICadjMEDz	bladder_cell	0	0.29	0.15
UKB_460K.bp_SYSTOLICadjMEDz	bladder_cell	0.00099	0.65	0.56
UKB_460K.disease_CARDIOVASCULAR	bladder_cell	0	0.96	0.88
UKB_460K.disease_HYPERTENSION_DIAGNOSED	bladder_cell	0	0.73	0.87
PASS_FastingGlucose_Manning	bladder_cell	0	1	0.49
UKB_460K.biochemistry_AlanineAminotransferase	bladder_cell	0	1	0.29
UKB_460K.biochemistry_AlkalinePhosphatase	bladder_cell	0	1	0.95
UKB_460K.biochemistry_Cholesterol	bladder_cell	0	1	0.7
UKB_460K.biochemistry_Glucose	bladder_cell	0	1	0.94
UKB_460K.biochemistry_HDLcholesterol	bladder_cell	0	1	0.86
UKB_460K.biochemistry_HbA1c	bladder_cell	0	1	0.9
UKB_460K.biochemistry_LDLdirect	bladder_cell	0	1	0.55
UKB_460K.biochemistry_SHBG	bladder_cell	0	1	0.24
UKB_460K.biochemistry_Testosterone_Male	bladder_cell	0	1	0.65
UKB_460K.biochemistry_TotalBilirubin	bladder_cell	0	0.95	0.56
UKB_460K.biochemistry_TotalProtein	bladder_cell	0	1	0.68
UKB_460K.biochemistry_Triglycerides	bladder_cell	0	0.9	0.91
PASS_Type_1_Diabetes	bladder_cell	0	0.6	0.96
PASS_Type_2_Diabetes	bladder_cell	0	1	0.53
UKB_460K.bmd_HEEL_TSCOREz	bladder_cell	0.28	0.02	0.026
UKB_460K.body_BALDING1	bladder_cell	0.013	0.02	0.11
UKB_460K.body_HEIGHTz	bladder_cell	0	0.76	0.89
UKB_460K.body_WHRadjBMIz	bladder_cell	0.13	0.02	0.13
UKB_460K.cancer_BREAST	bladder_cell	0	0.13	0.5
UKB_460K.impedance_BASAL_METABOLIC_RATEz	bladder_cell	0.002	0.47	0.64
UKB_460K.lung_FEV1FVCzSMOKE	bladder_cell	0.67	0.02	0.039
UKB_460K.lung_FVCzSMOKE	bladder_cell	0.18	0.02	0.026
UKB_460K.pigment_HAIR	bladder_cell	0	1	0.44
UKB_460K.repro_MENARCHE_AGE	bladder_cell	0	0.98	0.73
UKB_460K.repro_MENOPAUSE_AGE	bladder_cell	0	1	0.91
PASS_CD_deLange2017	bladder_urothelial_cell	0	1	0.039
PASS_Celiac	bladder_urothelial_cell	0	1	0.23
PASS_IBD_deLange2017	bladder_urothelial_cell	0	0.92	0.14
PASS_Lupus	bladder_urothelial_cell	0	1	0.79
PASS_Multiple_sclerosis	bladder_urothelial_cell	0.0014	1	0.77
PASS_Primary_biliary_cirrhosis	bladder_urothelial_cell	0	1	0.75
PASS_Rheumatoid_Arthritis	bladder_urothelial_cell	0	0.99	0.18
PASS_UC_deLange2017	bladder_urothelial_cell	0	0.93	0.49
UKB_460K.blood_EOSINOPHIL_COUNT	bladder_urothelial_cell	0.0021	0.75	0.026
UKB_460K.blood_LYMPHOCYTE_COUNT	bladder_urothelial_cell	0	1	0.4
UKB_460K.blood_MEAN_CORPUSCULAR_HEMOGLOBIN	bladder_urothelial_cell	0	1	0.75
UKB_460K.blood_MONOCYTE_COUNT	bladder_urothelial_cell	0	1	0.24
UKB_460K.blood_PLATELET_COUNT	bladder_urothelial_cell	0	1	0.7
UKB_460K.blood_RBC_DISTRIB_WIDTH	bladder_urothelial_cell	0	1	0.71
UKB_460K.blood_RED_COUNT	bladder_urothelial_cell	0	1	0.56
UKB_460K.blood_WHITE_COUNT	bladder_urothelial_cell	0	1	0.54
UKB_460K.disease_AID_ALL	bladder_urothelial_cell	0.0007	1	0.15
UKB_460K.disease_ALLERGY_ECZEMA_DIAGNOSED	bladder_urothelial_cell	0	0.78	0.78
UKB_460K.disease_ASTHMA_DIAGNOSED	bladder_urothelial_cell	0	1	0.23
UKB_460K.disease_HYPOTHYROIDISM_SELF_REP	bladder_urothelial_cell	0.0007	1	0.5
UKB_460K.disease_RESPIRATORY_ENT	bladder_urothelial_cell	0	0.99	0.48
PASS_ADHD_Demontis2018	bladder_urothelial_cell	0	1	0.54
PASS_Alzheimers_Jansen2019	bladder_urothelial_cell	0	1	0.55
PASS_BIP_Stahl2019	bladder_urothelial_cell	0	1	0.84
PASS_DrinksPerWeek_Liu2019	bladder_urothelial_cell	0	1	0.44
PASS_GeneralRiskTolerance_KarlssonLinner2019	bladder_urothelial_cell	0	1	0.69
PASS_Insomnia_Jansen2019	bladder_urothelial_cell	0.0007	1	0.82
PASS_Intelligence_SavageJansen2018	bladder_urothelial_cell	0.0007	1	0.48
PASS_MDD_Howard2019	bladder_urothelial_cell	0.0014	1	0.3
PASS_ReactionTime_Davies2018	bladder_urothelial_cell	0.0007	1	0.67
PASS_SWB	bladder_urothelial_cell	0.0014	0.93	0.36
PASS_Schizophrenia_Pardinas2018	bladder_urothelial_cell	0.0007	1	0.35
PASS_SleepDuration_Dashti2019	bladder_urothelial_cell	0.0007	1	0.7
PASS_VerbalNumericReasoning_Davies2018	bladder_urothelial_cell	0.0007	1	0.55
PASS_Worry_Nagel2018	bladder_urothelial_cell	0.0007	1	0.57
UKB_460K.body_BMIz	bladder_urothelial_cell	0.0007	1	0.7
UKB_460K.cov_EDU_COLLEGE	bladder_urothelial_cell	0.0014	1	0.3
UKB_460K.cov_EDU_YEARS	bladder_urothelial_cell	0.0007	0.92	0.24
UKB_460K.cov_SMOKING_STATUS	bladder_urothelial_cell	0.0007	1	0.7
UKB_460K.mental_NEUROTICISM	bladder_urothelial_cell	0.0021	1	0.4
UKB_460K.other_MORNINGPERSON	bladder_urothelial_cell	0.0007	1	0.18
UKB_460K.repro_NumberChildrenEverBorn_Pooled	bladder_urothelial_cell	0	1	0.35
PASS_AtrialFibrillation_Nielsen2018	bladder_urothelial_cell	0	1	0.72
PASS_Coronary_Artery_Disease	bladder_urothelial_cell	0	0.96	0.15
UKB_460K.bp_DIASTOLICadjMEDz	bladder_urothelial_cell	0	1	0.55
UKB_460K.bp_SYSTOLICadjMEDz	bladder_urothelial_cell	0	1	0.51
UKB_460K.disease_CARDIOVASCULAR	bladder_urothelial_cell	0	1	0.86
UKB_460K.disease_HYPERTENSION_DIAGNOSED	bladder_urothelial_cell	0	1	0.86
PASS_FastingGlucose_Manning	bladder_urothelial_cell	0	0.55	0.81
UKB_460K.biochemistry_AlanineAminotransferase	bladder_urothelial_cell	0	0.96	0.51
UKB_460K.biochemistry_AlkalinePhosphatase	bladder_urothelial_cell	0	0.99	0.55
UKB_460K.biochemistry_Cholesterol	bladder_urothelial_cell	0	1	0.44
UKB_460K.biochemistry_Glucose	bladder_urothelial_cell	0.0007	1	0.6
UKB_460K.biochemistry_HDLcholesterol	bladder_urothelial_cell	0	0.93	0.7
UKB_460K.biochemistry_HbA1c	bladder_urothelial_cell	0	1	0.6
UKB_460K.biochemistry_LDLdirect	bladder_urothelial_cell	0.0007	0.93	0.42
UKB_460K.biochemistry_SHBG	bladder_urothelial_cell	0	1	0.86
UKB_460K.biochemistry_Testosterone_Male	bladder_urothelial_cell	0	1	0.88
UKB_460K.biochemistry_TotalBilirubin	bladder_urothelial_cell	0	1	0.22
UKB_460K.biochemistry_TotalProtein	bladder_urothelial_cell	0	1	0.55
UKB_460K.biochemistry_Triglycerides	bladder_urothelial_cell	0	1	0.75
PASS_Type_1_Diabetes	bladder_urothelial_cell	0	1	0.65
PASS_Type_2_Diabetes	bladder_urothelial_cell	0	0.97	0.86
UKB_460K.bmd_HEEL_TSCOREz	bladder_urothelial_cell	0.0007	0.83	0.026
UKB_460K.body_BALDING1	bladder_urothelial_cell	0	0.78	0.3
UKB_460K.body_HEIGHTz	bladder_urothelial_cell	0	1	0.52
UKB_460K.body_WHRadjBMIz	bladder_urothelial_cell	0	1	0.33
UKB_460K.cancer_BREAST	bladder_urothelial_cell	0	1	0.46
UKB_460K.impedance_BASAL_METABOLIC_RATEz	bladder_urothelial_cell	0	1	0.32
UKB_460K.lung_FEV1FVCzSMOKE	bladder_urothelial_cell	0.0021	1	0.14
UKB_460K.lung_FVCzSMOKE	bladder_urothelial_cell	0	1	0.28
UKB_460K.pigment_HAIR	bladder_urothelial_cell	0.0049	0.26	0.39
UKB_460K.repro_MENARCHE_AGE	bladder_urothelial_cell	0	1	0.69
UKB_460K.repro_MENOPAUSE_AGE	bladder_urothelial_cell	0	0.54	0.14
PASS_CD_deLange2017	brain_pericyte	0	1	0.74
PASS_Celiac	brain_pericyte	0.0021	0.73	0.67
PASS_IBD_deLange2017	brain_pericyte	0	1	0.57
PASS_Lupus	brain_pericyte	0	1	0.93
PASS_Multiple_sclerosis	brain_pericyte	0	1	0.55
PASS_Primary_biliary_cirrhosis	brain_pericyte	0	1	0.87
PASS_Rheumatoid_Arthritis	brain_pericyte	0	1	0.66
PASS_UC_deLange2017	brain_pericyte	0	1	0.57
UKB_460K.blood_EOSINOPHIL_COUNT	brain_pericyte	0	1	0.9
UKB_460K.blood_LYMPHOCYTE_COUNT	brain_pericyte	0	1	0.33
UKB_460K.blood_MEAN_CORPUSCULAR_HEMOGLOBIN	brain_pericyte	0	0.63	0.77
UKB_460K.blood_MONOCYTE_COUNT	brain_pericyte	0	0.95	0.1
UKB_460K.blood_PLATELET_COUNT	brain_pericyte	0	0.11	0.05
UKB_460K.blood_RBC_DISTRIB_WIDTH	brain_pericyte	0	0.93	0.86
UKB_460K.blood_RED_COUNT	brain_pericyte	0	0.73	0.99
UKB_460K.blood_WHITE_COUNT	brain_pericyte	0	1	0.55
UKB_460K.disease_AID_ALL	brain_pericyte	0	1	0.85
UKB_460K.disease_ALLERGY_ECZEMA_DIAGNOSED	brain_pericyte	0	0.6	0.68
UKB_460K.disease_ASTHMA_DIAGNOSED	brain_pericyte	0.01	0.22	0.23
UKB_460K.disease_HYPOTHYROIDISM_SELF_REP	brain_pericyte	0	1	0.61
UKB_460K.disease_RESPIRATORY_ENT	brain_pericyte	0.0041	0.59	0.73
PASS_ADHD_Demontis2018	brain_pericyte	0	1	0.54
PASS_Alzheimers_Jansen2019	brain_pericyte	0	0.66	0.68
PASS_BIP_Stahl2019	brain_pericyte	0	0.72	0.54
PASS_DrinksPerWeek_Liu2019	brain_pericyte	0	0.41	0.73
PASS_GeneralRiskTolerance_KarlssonLinner2019	brain_pericyte	0	0.85	0.26
PASS_Insomnia_Jansen2019	brain_pericyte	0	0.19	0.12
PASS_Intelligence_SavageJansen2018	brain_pericyte	0.0021	0.45	0.26
PASS_MDD_Howard2019	brain_pericyte	0	0.99	0.95
PASS_ReactionTime_Davies2018	brain_pericyte	0	0.39	0.36
PASS_SWB	brain_pericyte	0.0041	0.33	0.54
PASS_Schizophrenia_Pardinas2018	brain_pericyte	0.0021	0.6	0.38
PASS_SleepDuration_Dashti2019	brain_pericyte	0	0.59	0.37
PASS_VerbalNumericReasoning_Davies2018	brain_pericyte	0	0.5	0.2
PASS_Worry_Nagel2018	brain_pericyte	0	0.93	0.65
UKB_460K.body_BMIz	brain_pericyte	0.0041	0.4	0.36
UKB_460K.cov_EDU_COLLEGE	brain_pericyte	0	0.55	0.97
UKB_460K.cov_EDU_YEARS	brain_pericyte	0.021	0.084	0.3
UKB_460K.cov_SMOKING_STATUS	brain_pericyte	0	0.55	0.61
UKB_460K.mental_NEUROTICISM	brain_pericyte	0.0041	0.41	0.85
UKB_460K.other_MORNINGPERSON	brain_pericyte	0.0021	0.68	0.8
UKB_460K.repro_NumberChildrenEverBorn_Pooled	brain_pericyte	0	1	0.87
PASS_AtrialFibrillation_Nielsen2018	brain_pericyte	0	0.58	0.039
PASS_Coronary_Artery_Disease	brain_pericyte	0	0.02	0.039
UKB_460K.bp_DIASTOLICadjMEDz	brain_pericyte	0.15	0.02	0.039
UKB_460K.bp_SYSTOLICadjMEDz	brain_pericyte	0.2	0.02	0.026
UKB_460K.disease_CARDIOVASCULAR	brain_pericyte	0	0.02	0.05
UKB_460K.disease_HYPERTENSION_DIAGNOSED	brain_pericyte	0.01	0.02	0.026
PASS_FastingGlucose_Manning	brain_pericyte	0	0.66	0.13
UKB_460K.biochemistry_AlanineAminotransferase	brain_pericyte	0	0.92	0.37
UKB_460K.biochemistry_AlkalinePhosphatase	brain_pericyte	0	0.81	0.99
UKB_460K.biochemistry_Cholesterol	brain_pericyte	0	0.97	0.85
UKB_460K.biochemistry_Glucose	brain_pericyte	0	1	0.48
UKB_460K.biochemistry_HDLcholesterol	brain_pericyte	0	0.55	0.91
UKB_460K.biochemistry_HbA1c	brain_pericyte	0	1	0.81
UKB_460K.biochemistry_LDLdirect	brain_pericyte	0	0.64	0.64
UKB_460K.biochemistry_SHBG	brain_pericyte	0	0.67	0.5
UKB_460K.biochemistry_Testosterone_Male	brain_pericyte	0	0.88	0.24
UKB_460K.biochemistry_TotalBilirubin	brain_pericyte	0	1	0.56
UKB_460K.biochemistry_TotalProtein	brain_pericyte	0	0.77	0.49
UKB_460K.biochemistry_Triglycerides	brain_pericyte	0	0.53	0.38
PASS_Type_1_Diabetes	brain_pericyte	0	1	0.55
PASS_Type_2_Diabetes	brain_pericyte	0	0.95	0.42
UKB_460K.bmd_HEEL_TSCOREz	brain_pericyte	0.0021	0.27	0.32
UKB_460K.body_BALDING1	brain_pericyte	0	0.64	0.81
UKB_460K.body_HEIGHTz	brain_pericyte	0.01	0.14	0.28
UKB_460K.body_WHRadjBMIz	brain_pericyte	0.035	0.084	0.54
UKB_460K.cancer_BREAST	brain_pericyte	0	0.36	0.32
UKB_460K.impedance_BASAL_METABOLIC_RATEz	brain_pericyte	0.0021	0.5	0.24
UKB_460K.lung_FEV1FVCzSMOKE	brain_pericyte	0.67	0.02	0.026
UKB_460K.lung_FVCzSMOKE	brain_pericyte	0.019	0.067	0.33
UKB_460K.pigment_HAIR	brain_pericyte	0.0021	0.55	0.69
UKB_460K.repro_MENARCHE_AGE	brain_pericyte	0	0.69	0.76
UKB_460K.repro_MENOPAUSE_AGE	brain_pericyte	0	1	0.81
PASS_CD_deLange2017	bronchial_smooth_muscle_cell	0	1	0.026
PASS_Celiac	bronchial_smooth_muscle_cell	0	0.84	0.17
PASS_IBD_deLange2017	bronchial_smooth_muscle_cell	0	1	0.54
PASS_Lupus	bronchial_smooth_muscle_cell	0	1	0.6
PASS_Multiple_sclerosis	bronchial_smooth_muscle_cell	0.00047	1	0.15
PASS_Primary_biliary_cirrhosis	bronchial_smooth_muscle_cell	0	1	0.56
PASS_Rheumatoid_Arthritis	bronchial_smooth_muscle_cell	0	1	0.81
PASS_UC_deLange2017	bronchial_smooth_muscle_cell	0	1	0.7
UKB_460K.blood_EOSINOPHIL_COUNT	bronchial_smooth_muscle_cell	0.00047	0.99	0.026
UKB_460K.blood_LYMPHOCYTE_COUNT	bronchial_smooth_muscle_cell	0.0047	0.81	0.026
UKB_460K.blood_MEAN_CORPUSCULAR_HEMOGLOBIN	bronchial_smooth_muscle_cell	0	1	0.39
UKB_460K.blood_MONOCYTE_COUNT	bronchial_smooth_muscle_cell	0.01	0.39	0.026
UKB_460K.blood_PLATELET_COUNT	bronchial_smooth_muscle_cell	0	0.86	0.34
UKB_460K.blood_RBC_DISTRIB_WIDTH	bronchial_smooth_muscle_cell	0.00047	1	0.57
UKB_460K.blood_RED_COUNT	bronchial_smooth_muscle_cell	0	0.71	0.73
UKB_460K.blood_WHITE_COUNT	bronchial_smooth_muscle_cell	0	0.46	0.05
UKB_460K.disease_AID_ALL	bronchial_smooth_muscle_cell	0.00094	0.89	0.026
UKB_460K.disease_ALLERGY_ECZEMA_DIAGNOSED	bronchial_smooth_muscle_cell	0	1	0.62
UKB_460K.disease_ASTHMA_DIAGNOSED	bronchial_smooth_muscle_cell	0.00047	1	0.54
UKB_460K.disease_HYPOTHYROIDISM_SELF_REP	bronchial_smooth_muscle_cell	0.00047	1	0.026
UKB_460K.disease_RESPIRATORY_ENT	bronchial_smooth_muscle_cell	0.00094	1	0.62
PASS_ADHD_Demontis2018	bronchial_smooth_muscle_cell	0.00047	0.28	0.59
PASS_Alzheimers_Jansen2019	bronchial_smooth_muscle_cell	0	1	0.66
PASS_BIP_Stahl2019	bronchial_smooth_muscle_cell	0	1	0.92
PASS_DrinksPerWeek_Liu2019	bronchial_smooth_muscle_cell	0	1	0.24
PASS_GeneralRiskTolerance_KarlssonLinner2019	bronchial_smooth_muscle_cell	0	0.54	0.17
PASS_Insomnia_Jansen2019	bronchial_smooth_muscle_cell	0	1	0.66
PASS_Intelligence_SavageJansen2018	bronchial_smooth_muscle_cell	0	1	0.33
PASS_MDD_Howard2019	bronchial_smooth_muscle_cell	0.00047	1	0.41
PASS_ReactionTime_Davies2018	bronchial_smooth_muscle_cell	0.0019	0.13	0.73
PASS_SWB	bronchial_smooth_muscle_cell	0.00094	0.55	0.61
PASS_Schizophrenia_Pardinas2018	bronchial_smooth_muscle_cell	0.0024	0.44	0.35
PASS_SleepDuration_Dashti2019	bronchial_smooth_muscle_cell	0.00094	0.77	0.93
PASS_VerbalNumericReasoning_Davies2018	bronchial_smooth_muscle_cell	0	1	0.51
PASS_Worry_Nagel2018	bronchial_smooth_muscle_cell	0.0014	0.43	0.48
UKB_460K.body_BMIz	bronchial_smooth_muscle_cell	0.0024	0.54	0.7
UKB_460K.cov_EDU_COLLEGE	bronchial_smooth_muscle_cell	0.0014	0.84	0.29
UKB_460K.cov_EDU_YEARS	bronchial_smooth_muscle_cell	0.00047	0.97	0.11
UKB_460K.cov_SMOKING_STATUS	bronchial_smooth_muscle_cell	0	0.73	0.52
UKB_460K.mental_NEUROTICISM	bronchial_smooth_muscle_cell	0.0024	0.47	0.48
UKB_460K.other_MORNINGPERSON	bronchial_smooth_muscle_cell	0.00094	0.33	0.49
UKB_460K.repro_NumberChildrenEverBorn_Pooled	bronchial_smooth_muscle_cell	0	1	0.6
PASS_AtrialFibrillation_Nielsen2018	bronchial_smooth_muscle_cell	0.00094	0.81	0.21
PASS_Coronary_Artery_Disease	bronchial_smooth_muscle_cell	0	0.33	0.05
UKB_460K.bp_DIASTOLICadjMEDz	bronchial_smooth_muscle_cell	0.0094	0.034	0.026
UKB_460K.bp_SYSTOLICadjMEDz	bronchial_smooth_muscle_cell	0.0028	0.2	0.093
UKB_460K.disease_CARDIOVASCULAR	bronchial_smooth_muscle_cell	0	0.02	0.026
UKB_460K.disease_HYPERTENSION_DIAGNOSED	bronchial_smooth_muscle_cell	0.00094	0.067	0.039
PASS_FastingGlucose_Manning	bronchial_smooth_muscle_cell	0	1	0.54
UKB_460K.biochemistry_AlanineAminotransferase	bronchial_smooth_muscle_cell	0.00047	1	0.81
UKB_460K.biochemistry_AlkalinePhosphatase	bronchial_smooth_muscle_cell	0	1	0.77
UKB_460K.biochemistry_Cholesterol	bronchial_smooth_muscle_cell	0	0.93	0.61
UKB_460K.biochemistry_Glucose	bronchial_smooth_muscle_cell	0	1	0.8
UKB_460K.biochemistry_HDLcholesterol	bronchial_smooth_muscle_cell	0.00094	0.32	0.32
UKB_460K.biochemistry_HbA1c	bronchial_smooth_muscle_cell	0	1	0.62
UKB_460K.biochemistry_LDLdirect	bronchial_smooth_muscle_cell	0.0014	0.89	0.81
UKB_460K.biochemistry_SHBG	bronchial_smooth_muscle_cell	0	1	0.88
UKB_460K.biochemistry_Testosterone_Male	bronchial_smooth_muscle_cell	0	1	0.93
UKB_460K.biochemistry_TotalBilirubin	bronchial_smooth_muscle_cell	0	1	0.73
UKB_460K.biochemistry_TotalProtein	bronchial_smooth_muscle_cell	0	0.61	0.2
UKB_460K.biochemistry_Triglycerides	bronchial_smooth_muscle_cell	0	1	0.72
PASS_Type_1_Diabetes	bronchial_smooth_muscle_cell	0	1	0.026
PASS_Type_2_Diabetes	bronchial_smooth_muscle_cell	0.00094	1	0.89
UKB_460K.bmd_HEEL_TSCOREz	bronchial_smooth_muscle_cell	0.0047	0.32	0.093
UKB_460K.body_BALDING1	bronchial_smooth_muscle_cell	0	1	0.89
UKB_460K.body_HEIGHTz	bronchial_smooth_muscle_cell	0	0.98	0.74
UKB_460K.body_WHRadjBMIz	bronchial_smooth_muscle_cell	0.019	0.084	0.05
UKB_460K.cancer_BREAST	bronchial_smooth_muscle_cell	0	0.84	0.94
UKB_460K.impedance_BASAL_METABOLIC_RATEz	bronchial_smooth_muscle_cell	0.00094	0.6	0.54
UKB_460K.lung_FEV1FVCzSMOKE	bronchial_smooth_muscle_cell	0.043	0.077	0.11
UKB_460K.lung_FVCzSMOKE	bronchial_smooth_muscle_cell	0.0014	0.48	0.23
UKB_460K.pigment_HAIR	bronchial_smooth_muscle_cell	0.00094	0.73	0.4
UKB_460K.repro_MENARCHE_AGE	bronchial_smooth_muscle_cell	0.0038	0.15	0.2
UKB_460K.repro_MENOPAUSE_AGE	bronchial_smooth_muscle_cell	0	1	0.63
PASS_CD_deLange2017	bulge_keratinocyte	0	1	0.38
PASS_Celiac	bulge_keratinocyte	0	1	0.69
PASS_IBD_deLange2017	bulge_keratinocyte	0	1	0.71
PASS_Lupus	bulge_keratinocyte	0	1	0.32
PASS_Multiple_sclerosis	bulge_keratinocyte	0	1	0.33
PASS_Primary_biliary_cirrhosis	bulge_keratinocyte	0	1	0.6
PASS_Rheumatoid_Arthritis	bulge_keratinocyte	0	1	0.64
PASS_UC_deLange2017	bulge_keratinocyte	0	0.78	0.54
UKB_460K.blood_EOSINOPHIL_COUNT	bulge_keratinocyte	0.00038	1	0.39
UKB_460K.blood_LYMPHOCYTE_COUNT	bulge_keratinocyte	0	1	0.33
UKB_460K.blood_MEAN_CORPUSCULAR_HEMOGLOBIN	bulge_keratinocyte	0	1	0.9
UKB_460K.blood_MONOCYTE_COUNT	bulge_keratinocyte	0	1	0.4
UKB_460K.blood_PLATELET_COUNT	bulge_keratinocyte	0	1	0.49
UKB_460K.blood_RBC_DISTRIB_WIDTH	bulge_keratinocyte	0	1	0.47
UKB_460K.blood_RED_COUNT	bulge_keratinocyte	0	1	0.86
UKB_460K.blood_WHITE_COUNT	bulge_keratinocyte	0	1	0.95
UKB_460K.disease_AID_ALL	bulge_keratinocyte	0.00038	1	0.89
UKB_460K.disease_ALLERGY_ECZEMA_DIAGNOSED	bulge_keratinocyte	0.0019	0.76	0.39
UKB_460K.disease_ASTHMA_DIAGNOSED	bulge_keratinocyte	0.0023	0.55	0.039
UKB_460K.disease_HYPOTHYROIDISM_SELF_REP	bulge_keratinocyte	0.00038	1	0.48
UKB_460K.disease_RESPIRATORY_ENT	bulge_keratinocyte	0.0012	0.75	0.15
PASS_ADHD_Demontis2018	bulge_keratinocyte	0	0.89	0.84
PASS_Alzheimers_Jansen2019	bulge_keratinocyte	0	0.95	0.7
PASS_BIP_Stahl2019	bulge_keratinocyte	0	0.82	0.81
PASS_DrinksPerWeek_Liu2019	bulge_keratinocyte	0	1	0.77
PASS_GeneralRiskTolerance_KarlssonLinner2019	bulge_keratinocyte	0.00038	0.76	0.54
PASS_Insomnia_Jansen2019	bulge_keratinocyte	0	1	0.83
PASS_Intelligence_SavageJansen2018	bulge_keratinocyte	0.00077	0.84	0.62
PASS_MDD_Howard2019	bulge_keratinocyte	0	1	0.5
PASS_ReactionTime_Davies2018	bulge_keratinocyte	0.005	0.067	0.63
PASS_SWB	bulge_keratinocyte	0.0012	0.97	0.48
PASS_Schizophrenia_Pardinas2018	bulge_keratinocyte	0.0012	0.58	0.34
PASS_SleepDuration_Dashti2019	bulge_keratinocyte	0	1	0.73
PASS_VerbalNumericReasoning_Davies2018	bulge_keratinocyte	0	1	0.79
PASS_Worry_Nagel2018	bulge_keratinocyte	0.0012	0.79	0.53
UKB_460K.body_BMIz	bulge_keratinocyte	0.0073	0.28	0.57
UKB_460K.cov_EDU_COLLEGE	bulge_keratinocyte	0.00038	0.96	0.84
UKB_460K.cov_EDU_YEARS	bulge_keratinocyte	0	0.97	0.89
UKB_460K.cov_SMOKING_STATUS	bulge_keratinocyte	0.00038	0.4	0.97
UKB_460K.mental_NEUROTICISM	bulge_keratinocyte	0.00038	0.43	0.57
UKB_460K.other_MORNINGPERSON	bulge_keratinocyte	0	0.9	0.24
UKB_460K.repro_NumberChildrenEverBorn_Pooled	bulge_keratinocyte	0.00038	0.88	0.48
PASS_AtrialFibrillation_Nielsen2018	bulge_keratinocyte	0.00038	0.88	0.47
PASS_Coronary_Artery_Disease	bulge_keratinocyte	0	1	0.4
UKB_460K.bp_DIASTOLICadjMEDz	bulge_keratinocyte	0.00077	0.6	0.33
UKB_460K.bp_SYSTOLICadjMEDz	bulge_keratinocyte	0.00038	0.82	0.49
UKB_460K.disease_CARDIOVASCULAR	bulge_keratinocyte	0	1	0.8
UKB_460K.disease_HYPERTENSION_DIAGNOSED	bulge_keratinocyte	0	1	0.68
PASS_FastingGlucose_Manning	bulge_keratinocyte	0.00038	0.88	0.64
UKB_460K.biochemistry_AlanineAminotransferase	bulge_keratinocyte	0	0.72	0.82
UKB_460K.biochemistry_AlkalinePhosphatase	bulge_keratinocyte	0	1	0.98
UKB_460K.biochemistry_Cholesterol	bulge_keratinocyte	0.00038	0.66	0.8
UKB_460K.biochemistry_Glucose	bulge_keratinocyte	0.00077	0.77	0.82
UKB_460K.biochemistry_HDLcholesterol	bulge_keratinocyte	0	1	0.8
UKB_460K.biochemistry_HbA1c	bulge_keratinocyte	0.00038	1	0.91
UKB_460K.biochemistry_LDLdirect	bulge_keratinocyte	0.0038	0.23	0.77
UKB_460K.biochemistry_SHBG	bulge_keratinocyte	0	0.75	0.84
UKB_460K.biochemistry_Testosterone_Male	bulge_keratinocyte	0	0.98	0.54
UKB_460K.biochemistry_TotalBilirubin	bulge_keratinocyte	0	1	0.82
UKB_460K.biochemistry_TotalProtein	bulge_keratinocyte	0	0.98	0.75
UKB_460K.biochemistry_Triglycerides	bulge_keratinocyte	0.00038	0.9	0.88
PASS_Type_1_Diabetes	bulge_keratinocyte	0	1	0.61
PASS_Type_2_Diabetes	bulge_keratinocyte	0	0.86	0.51
UKB_460K.bmd_HEEL_TSCOREz	bulge_keratinocyte	0.0015	0.67	0.55
UKB_460K.body_BALDING1	bulge_keratinocyte	0.011	0.02	0.085
UKB_460K.body_HEIGHTz	bulge_keratinocyte	0	1	0.44
UKB_460K.body_WHRadjBMIz	bulge_keratinocyte	0.0069	0.17	0.15
UKB_460K.cancer_BREAST	bulge_keratinocyte	0	0.19	0.19
UKB_460K.impedance_BASAL_METABOLIC_RATEz	bulge_keratinocyte	0.0038	0.22	0.48
UKB_460K.lung_FEV1FVCzSMOKE	bulge_keratinocyte	0.066	0.046	0.026
UKB_460K.lung_FVCzSMOKE	bulge_keratinocyte	0.0073	0.11	0.11
UKB_460K.pigment_HAIR	bulge_keratinocyte	0.015	0.02	0.19
UKB_460K.repro_MENARCHE_AGE	bulge_keratinocyte	0.00038	0.76	0.59
UKB_460K.repro_MENOPAUSE_AGE	bulge_keratinocyte	0	1	0.89
PASS_CD_deLange2017	chondrocyte	0	0.59	0.52
PASS_Celiac	chondrocyte	0	0.49	0.26
PASS_IBD_deLange2017	chondrocyte	0	0.68	0.84
PASS_Lupus	chondrocyte	0	1	0.76
PASS_Multiple_sclerosis	chondrocyte	0	1	0.94
PASS_Primary_biliary_cirrhosis	chondrocyte	0	1	0.96
PASS_Rheumatoid_Arthritis	chondrocyte	0	0.86	0.97
PASS_UC_deLange2017	chondrocyte	0	1	0.96
UKB_460K.blood_EOSINOPHIL_COUNT	chondrocyte	0	1	0.8
UKB_460K.blood_LYMPHOCYTE_COUNT	chondrocyte	0	0.91	0.35
UKB_460K.blood_MEAN_CORPUSCULAR_HEMOGLOBIN	chondrocyte	0	0.86	0.68
UKB_460K.blood_MONOCYTE_COUNT	chondrocyte	0	1	0.89
UKB_460K.blood_PLATELET_COUNT	chondrocyte	0	1	0.91
UKB_460K.blood_RBC_DISTRIB_WIDTH	chondrocyte	0	0.87	0.6
UKB_460K.blood_RED_COUNT	chondrocyte	0	1	0.53
UKB_460K.blood_WHITE_COUNT	chondrocyte	0	0.98	0.76
UKB_460K.disease_AID_ALL	chondrocyte	0	0.96	0.95
UKB_460K.disease_ALLERGY_ECZEMA_DIAGNOSED	chondrocyte	0	0.87	0.88
UKB_460K.disease_ASTHMA_DIAGNOSED	chondrocyte	0	0.86	0.79
UKB_460K.disease_HYPOTHYROIDISM_SELF_REP	chondrocyte	0.0036	0.85	0.58
UKB_460K.disease_RESPIRATORY_ENT	chondrocyte	0	1	0.97
PASS_ADHD_Demontis2018	chondrocyte	0	1	0.67
PASS_Alzheimers_Jansen2019	chondrocyte	0	0.94	0.89
PASS_BIP_Stahl2019	chondrocyte	0	0.22	0.76
PASS_DrinksPerWeek_Liu2019	chondrocyte	0	0.88	1
PASS_GeneralRiskTolerance_KarlssonLinner2019	chondrocyte	0	0.35	0.88
PASS_Insomnia_Jansen2019	chondrocyte	0	0.66	0.97
PASS_Intelligence_SavageJansen2018	chondrocyte	0.0036	0.68	0.66
PASS_MDD_Howard2019	chondrocyte	0	0.93	0.98
PASS_ReactionTime_Davies2018	chondrocyte	0	1	0.74
PASS_SWB	chondrocyte	0	0.39	0.44
PASS_Schizophrenia_Pardinas2018	chondrocyte	0	0.48	0.89
PASS_SleepDuration_Dashti2019	chondrocyte	0	1	0.7
PASS_VerbalNumericReasoning_Davies2018	chondrocyte	0	0.67	0.87
PASS_Worry_Nagel2018	chondrocyte	0.0073	0.31	0.67
UKB_460K.body_BMIz	chondrocyte	0.0036	0.65	0.83
UKB_460K.cov_EDU_COLLEGE	chondrocyte	0	1	0.83
UKB_460K.cov_EDU_YEARS	chondrocyte	0	0.9	0.73
UKB_460K.cov_SMOKING_STATUS	chondrocyte	0	0.66	0.65
UKB_460K.mental_NEUROTICISM	chondrocyte	0	0.62	0.17
UKB_460K.other_MORNINGPERSON	chondrocyte	0	0.85	0.88
UKB_460K.repro_NumberChildrenEverBorn_Pooled	chondrocyte	0	1	0.97
PASS_AtrialFibrillation_Nielsen2018	chondrocyte	0	0.29	0.51
PASS_Coronary_Artery_Disease	chondrocyte	0	0.69	0.96
UKB_460K.bp_DIASTOLICadjMEDz	chondrocyte	0	0.57	0.48
UKB_460K.bp_SYSTOLICadjMEDz	chondrocyte	0	0.54	0.48
UKB_460K.disease_CARDIOVASCULAR	chondrocyte	0	1	0.57
UKB_460K.disease_HYPERTENSION_DIAGNOSED	chondrocyte	0	0.96	0.64
PASS_FastingGlucose_Manning	chondrocyte	0	0.55	0.19
UKB_460K.biochemistry_AlanineAminotransferase	chondrocyte	0	0.68	0.94
UKB_460K.biochemistry_AlkalinePhosphatase	chondrocyte	0	0.71	0.81
UKB_460K.biochemistry_Cholesterol	chondrocyte	0	1	0.89
UKB_460K.biochemistry_Glucose	chondrocyte	0	1	0.74
UKB_460K.biochemistry_HDLcholesterol	chondrocyte	0	1	0.74
UKB_460K.biochemistry_HbA1c	chondrocyte	0	0.62	0.13
UKB_460K.biochemistry_LDLdirect	chondrocyte	0	1	0.91
UKB_460K.biochemistry_SHBG	chondrocyte	0	1	0.78
UKB_460K.biochemistry_Testosterone_Male	chondrocyte	0	0.93	0.59
UKB_460K.biochemistry_TotalBilirubin	chondrocyte	0	0.55	0.62
UKB_460K.biochemistry_TotalProtein	chondrocyte	0	0.69	0.65
UKB_460K.biochemistry_Triglycerides	chondrocyte	0	0.92	0.64
PASS_Type_1_Diabetes	chondrocyte	0	0.52	0.78
PASS_Type_2_Diabetes	chondrocyte	0	0.9	0.68
UKB_460K.bmd_HEEL_TSCOREz	chondrocyte	0.28	0.02	0.51
UKB_460K.body_BALDING1	chondrocyte	0.015	0.19	0.77
UKB_460K.body_HEIGHTz	chondrocyte	0.71	0.02	0.1
UKB_460K.body_WHRadjBMIz	chondrocyte	0.68	0.02	0.2
UKB_460K.cancer_BREAST	chondrocyte	0	0.24	0.66
UKB_460K.impedance_BASAL_METABOLIC_RATEz	chondrocyte	0.0036	0.2	0.86
UKB_460K.lung_FEV1FVCzSMOKE	chondrocyte	0.81	0.02	0.37
UKB_460K.lung_FVCzSMOKE	chondrocyte	0.52	0.02	0.26
UKB_460K.pigment_HAIR	chondrocyte	0	0.82	0.86
UKB_460K.repro_MENARCHE_AGE	chondrocyte	0	0.77	0.97
UKB_460K.repro_MENOPAUSE_AGE	chondrocyte	0	1	0.89
PASS_CD_deLange2017	ciliated_columnar_cell_of_tracheobronchial_tree	0	1	0.92
PASS_Celiac	ciliated_columnar_cell_of_tracheobronchial_tree	0	0.97	0.6
PASS_IBD_deLange2017	ciliated_columnar_cell_of_tracheobronchial_tree	0	1	0.8
PASS_Lupus	ciliated_columnar_cell_of_tracheobronchial_tree	0	1	0.66
PASS_Multiple_sclerosis	ciliated_columnar_cell_of_tracheobronchial_tree	0	0.92	0.6
PASS_Primary_biliary_cirrhosis	ciliated_columnar_cell_of_tracheobronchial_tree	0	0.96	0.79
PASS_Rheumatoid_Arthritis	ciliated_columnar_cell_of_tracheobronchial_tree	0	0.82	0.21
PASS_UC_deLange2017	ciliated_columnar_cell_of_tracheobronchial_tree	0	0.77	0.63
UKB_460K.blood_EOSINOPHIL_COUNT	ciliated_columnar_cell_of_tracheobronchial_tree	0	1	0.29
UKB_460K.blood_LYMPHOCYTE_COUNT	ciliated_columnar_cell_of_tracheobronchial_tree	0	0.83	0.52
UKB_460K.blood_MEAN_CORPUSCULAR_HEMOGLOBIN	ciliated_columnar_cell_of_tracheobronchial_tree	0	0.21	0.06
UKB_460K.blood_MONOCYTE_COUNT	ciliated_columnar_cell_of_tracheobronchial_tree	0	1	0.69
UKB_460K.blood_PLATELET_COUNT	ciliated_columnar_cell_of_tracheobronchial_tree	0.014	0.034	0.53
UKB_460K.blood_RBC_DISTRIB_WIDTH	ciliated_columnar_cell_of_tracheobronchial_tree	0	0.13	0.91
UKB_460K.blood_RED_COUNT	ciliated_columnar_cell_of_tracheobronchial_tree	0	0.55	0.8
UKB_460K.blood_WHITE_COUNT	ciliated_columnar_cell_of_tracheobronchial_tree	0	1	0.59
UKB_460K.disease_AID_ALL	ciliated_columnar_cell_of_tracheobronchial_tree	0	1	0.68
UKB_460K.disease_ALLERGY_ECZEMA_DIAGNOSED	ciliated_columnar_cell_of_tracheobronchial_tree	0	0.82	0.55
UKB_460K.disease_ASTHMA_DIAGNOSED	ciliated_columnar_cell_of_tracheobronchial_tree	0	1	0.8
UKB_460K.disease_HYPOTHYROIDISM_SELF_REP	ciliated_columnar_cell_of_tracheobronchial_tree	0	1	0.44
UKB_460K.disease_RESPIRATORY_ENT	ciliated_columnar_cell_of_tracheobronchial_tree	0	1	0.74
PASS_ADHD_Demontis2018	ciliated_columnar_cell_of_tracheobronchial_tree	0	0.82	0.58
PASS_Alzheimers_Jansen2019	ciliated_columnar_cell_of_tracheobronchial_tree	0	1	0.026
PASS_BIP_Stahl2019	ciliated_columnar_cell_of_tracheobronchial_tree	0	1	0.65
PASS_DrinksPerWeek_Liu2019	ciliated_columnar_cell_of_tracheobronchial_tree	0	0.68	0.77
PASS_GeneralRiskTolerance_KarlssonLinner2019	ciliated_columnar_cell_of_tracheobronchial_tree	0	0.84	0.48
PASS_Insomnia_Jansen2019	ciliated_columnar_cell_of_tracheobronchial_tree	0	0.87	0.85
PASS_Intelligence_SavageJansen2018	ciliated_columnar_cell_of_tracheobronchial_tree	0	1	0.97
PASS_MDD_Howard2019	ciliated_columnar_cell_of_tracheobronchial_tree	0	1	0.89
PASS_ReactionTime_Davies2018	ciliated_columnar_cell_of_tracheobronchial_tree	0	1	0.91
PASS_SWB	ciliated_columnar_cell_of_tracheobronchial_tree	0	1	0.13
PASS_Schizophrenia_Pardinas2018	ciliated_columnar_cell_of_tracheobronchial_tree	0	1	0.73
PASS_SleepDuration_Dashti2019	ciliated_columnar_cell_of_tracheobronchial_tree	0	1	0.37
PASS_VerbalNumericReasoning_Davies2018	ciliated_columnar_cell_of_tracheobronchial_tree	0	1	0.6
PASS_Worry_Nagel2018	ciliated_columnar_cell_of_tracheobronchial_tree	0	0.9	0.92
UKB_460K.body_BMIz	ciliated_columnar_cell_of_tracheobronchial_tree	0	1	0.79
UKB_460K.cov_EDU_COLLEGE	ciliated_columnar_cell_of_tracheobronchial_tree	0	1	0.84
UKB_460K.cov_EDU_YEARS	ciliated_columnar_cell_of_tracheobronchial_tree	0	0.81	0.71
UKB_460K.cov_SMOKING_STATUS	ciliated_columnar_cell_of_tracheobronchial_tree	0	0.54	0.58
UKB_460K.mental_NEUROTICISM	ciliated_columnar_cell_of_tracheobronchial_tree	0	1	0.87
UKB_460K.other_MORNINGPERSON	ciliated_columnar_cell_of_tracheobronchial_tree	0	0.75	0.84
UKB_460K.repro_NumberChildrenEverBorn_Pooled	ciliated_columnar_cell_of_tracheobronchial_tree	0.014	0.077	0.36
PASS_AtrialFibrillation_Nielsen2018	ciliated_columnar_cell_of_tracheobronchial_tree	0	0.7	0.84
PASS_Coronary_Artery_Disease	ciliated_columnar_cell_of_tracheobronchial_tree	0	0.96	0.81
UKB_460K.bp_DIASTOLICadjMEDz	ciliated_columnar_cell_of_tracheobronchial_tree	0	0.99	0.65
UKB_460K.bp_SYSTOLICadjMEDz	ciliated_columnar_cell_of_tracheobronchial_tree	0	1	0.84
UKB_460K.disease_CARDIOVASCULAR	ciliated_columnar_cell_of_tracheobronchial_tree	0	0.58	0.9
UKB_460K.disease_HYPERTENSION_DIAGNOSED	ciliated_columnar_cell_of_tracheobronchial_tree	0	0.88	0.73
PASS_FastingGlucose_Manning	ciliated_columnar_cell_of_tracheobronchial_tree	0	0.61	0.95
UKB_460K.biochemistry_AlanineAminotransferase	ciliated_columnar_cell_of_tracheobronchial_tree	0	0.95	0.74
UKB_460K.biochemistry_AlkalinePhosphatase	ciliated_columnar_cell_of_tracheobronchial_tree	0	0.27	0.51
UKB_460K.biochemistry_Cholesterol	ciliated_columnar_cell_of_tracheobronchial_tree	0	0.82	0.8
UKB_460K.biochemistry_Glucose	ciliated_columnar_cell_of_tracheobronchial_tree	0	0.8	0.45
UKB_460K.biochemistry_HDLcholesterol	ciliated_columnar_cell_of_tracheobronchial_tree	0	0.5	0.77
UKB_460K.biochemistry_HbA1c	ciliated_columnar_cell_of_tracheobronchial_tree	0	0.99	0.93
UKB_460K.biochemistry_LDLdirect	ciliated_columnar_cell_of_tracheobronchial_tree	0	1	0.83
UKB_460K.biochemistry_SHBG	ciliated_columnar_cell_of_tracheobronchial_tree	0	0.41	0.8
UKB_460K.biochemistry_Testosterone_Male	ciliated_columnar_cell_of_tracheobronchial_tree	0	0.35	0.29
UKB_460K.biochemistry_TotalBilirubin	ciliated_columnar_cell_of_tracheobronchial_tree	0	0.47	0.63
UKB_460K.biochemistry_TotalProtein	ciliated_columnar_cell_of_tracheobronchial_tree	0	0.98	0.59
UKB_460K.biochemistry_Triglycerides	ciliated_columnar_cell_of_tracheobronchial_tree	0	0.67	0.54
PASS_Type_1_Diabetes	ciliated_columnar_cell_of_tracheobronchial_tree	0	1	0.92
PASS_Type_2_Diabetes	ciliated_columnar_cell_of_tracheobronchial_tree	0	0.83	0.57
UKB_460K.bmd_HEEL_TSCOREz	ciliated_columnar_cell_of_tracheobronchial_tree	0	1	0.58
UKB_460K.body_BALDING1	ciliated_columnar_cell_of_tracheobronchial_tree	0	0.83	0.89
UKB_460K.body_HEIGHTz	ciliated_columnar_cell_of_tracheobronchial_tree	0	0.74	0.77
UKB_460K.body_WHRadjBMIz	ciliated_columnar_cell_of_tracheobronchial_tree	0	0.48	0.71
UKB_460K.cancer_BREAST	ciliated_columnar_cell_of_tracheobronchial_tree	0	0.92	0.78
UKB_460K.impedance_BASAL_METABOLIC_RATEz	ciliated_columnar_cell_of_tracheobronchial_tree	0	1	0.71
UKB_460K.lung_FEV1FVCzSMOKE	ciliated_columnar_cell_of_tracheobronchial_tree	0	0.84	0.33
UKB_460K.lung_FVCzSMOKE	ciliated_columnar_cell_of_tracheobronchial_tree	0	0.38	0.81
UKB_460K.pigment_HAIR	ciliated_columnar_cell_of_tracheobronchial_tree	0	1	0.94
UKB_460K.repro_MENARCHE_AGE	ciliated_columnar_cell_of_tracheobronchial_tree	0	1	0.88
UKB_460K.repro_MENOPAUSE_AGE	ciliated_columnar_cell_of_tracheobronchial_tree	0	0.45	0.15
PASS_CD_deLange2017	classical_monocyte	0.015	0.093	0.11
PASS_Celiac	classical_monocyte	0	0.73	0.96
PASS_IBD_deLange2017	classical_monocyte	0.015	0.02	0.14
PASS_Lupus	classical_monocyte	0	0.69	0.95
PASS_Multiple_sclerosis	classical_monocyte	0.005	0.72	0.3
PASS_Primary_biliary_cirrhosis	classical_monocyte	0	0.077	0.38
PASS_Rheumatoid_Arthritis	classical_monocyte	0.005	0.49	0.19
PASS_UC_deLange2017	classical_monocyte	0	0.47	0.25
UKB_460K.blood_EOSINOPHIL_COUNT	classical_monocyte	0.025	0.11	0.27
UKB_460K.blood_LYMPHOCYTE_COUNT	classical_monocyte	0.015	0.16	0.25
UKB_460K.blood_MEAN_CORPUSCULAR_HEMOGLOBIN	classical_monocyte	0	0.88	0.42
UKB_460K.blood_MONOCYTE_COUNT	classical_monocyte	0.22	0.02	0.069
UKB_460K.blood_PLATELET_COUNT	classical_monocyte	0	1	0.9
UKB_460K.blood_RBC_DISTRIB_WIDTH	classical_monocyte	0	0.42	0.42
UKB_460K.blood_RED_COUNT	classical_monocyte	0	1	0.6
UKB_460K.blood_WHITE_COUNT	classical_monocyte	0.005	0.17	0.27
UKB_460K.disease_AID_ALL	classical_monocyte	0.0099	0.17	0.31
UKB_460K.disease_ALLERGY_ECZEMA_DIAGNOSED	classical_monocyte	0	1	0.75
UKB_460K.disease_ASTHMA_DIAGNOSED	classical_monocyte	0	1	0.78
UKB_460K.disease_HYPOTHYROIDISM_SELF_REP	classical_monocyte	0.005	0.27	0.54
UKB_460K.disease_RESPIRATORY_ENT	classical_monocyte	0	1	0.77
PASS_ADHD_Demontis2018	classical_monocyte	0	1	0.91
PASS_Alzheimers_Jansen2019	classical_monocyte	0	0.1	0.24
PASS_BIP_Stahl2019	classical_monocyte	0	1	0.54
PASS_DrinksPerWeek_Liu2019	classical_monocyte	0	1	0.98
PASS_GeneralRiskTolerance_KarlssonLinner2019	classical_monocyte	0	1	0.8
PASS_Insomnia_Jansen2019	classical_monocyte	0	1	0.44
PASS_Intelligence_SavageJansen2018	classical_monocyte	0	1	0.89
PASS_MDD_Howard2019	classical_monocyte	0	1	0.26
PASS_ReactionTime_Davies2018	classical_monocyte	0	1	0.7
PASS_SWB	classical_monocyte	0	1	0.77
PASS_Schizophrenia_Pardinas2018	classical_monocyte	0	1	0.73
PASS_SleepDuration_Dashti2019	classical_monocyte	0	1	0.27
PASS_VerbalNumericReasoning_Davies2018	classical_monocyte	0	1	0.25
PASS_Worry_Nagel2018	classical_monocyte	0	1	0.89
UKB_460K.body_BMIz	classical_monocyte	0	1	0.39
UKB_460K.cov_EDU_COLLEGE	classical_monocyte	0	1	0.35
UKB_460K.cov_EDU_YEARS	classical_monocyte	0	1	0.97
UKB_460K.cov_SMOKING_STATUS	classical_monocyte	0	1	0.4
UKB_460K.mental_NEUROTICISM	classical_monocyte	0	1	0.55
UKB_460K.other_MORNINGPERSON	classical_monocyte	0	0.96	0.34
UKB_460K.repro_NumberChildrenEverBorn_Pooled	classical_monocyte	0	1	0.87
PASS_AtrialFibrillation_Nielsen2018	classical_monocyte	0	1	0.9
PASS_Coronary_Artery_Disease	classical_monocyte	0	0.74	0.57
UKB_460K.bp_DIASTOLICadjMEDz	classical_monocyte	0	1	0.6
UKB_460K.bp_SYSTOLICadjMEDz	classical_monocyte	0	1	0.89
UKB_460K.disease_CARDIOVASCULAR	classical_monocyte	0	1	0.92
UKB_460K.disease_HYPERTENSION_DIAGNOSED	classical_monocyte	0	1	0.91
PASS_FastingGlucose_Manning	classical_monocyte	0	1	0.61
UKB_460K.biochemistry_AlanineAminotransferase	classical_monocyte	0	0.46	0.79
UKB_460K.biochemistry_AlkalinePhosphatase	classical_monocyte	0	0.45	0.35
UKB_460K.biochemistry_Cholesterol	classical_monocyte	0	0.58	0.4
UKB_460K.biochemistry_Glucose	classical_monocyte	0	1	0.25
UKB_460K.biochemistry_HDLcholesterol	classical_monocyte	0	0.88	0.33
UKB_460K.biochemistry_HbA1c	classical_monocyte	0	1	0.5
UKB_460K.biochemistry_LDLdirect	classical_monocyte	0	0.84	0.26
UKB_460K.biochemistry_SHBG	classical_monocyte	0	1	0.093
UKB_460K.biochemistry_Testosterone_Male	classical_monocyte	0	1	0.54
UKB_460K.biochemistry_TotalBilirubin	classical_monocyte	0	1	0.97
UKB_460K.biochemistry_TotalProtein	classical_monocyte	0	0.16	0.45
UKB_460K.biochemistry_Triglycerides	classical_monocyte	0	1	0.14
PASS_Type_1_Diabetes	classical_monocyte	0	0.79	0.89
PASS_Type_2_Diabetes	classical_monocyte	0	1	0.93
UKB_460K.bmd_HEEL_TSCOREz	classical_monocyte	0	1	0.72
UKB_460K.body_BALDING1	classical_monocyte	0	1	0.51
UKB_460K.body_HEIGHTz	classical_monocyte	0	1	0.3
UKB_460K.body_WHRadjBMIz	classical_monocyte	0	1	0.47
UKB_460K.cancer_BREAST	classical_monocyte	0	1	0.48
UKB_460K.impedance_BASAL_METABOLIC_RATEz	classical_monocyte	0	1	0.5
UKB_460K.lung_FEV1FVCzSMOKE	classical_monocyte	0	1	0.33
UKB_460K.lung_FVCzSMOKE	classical_monocyte	0	1	0.47
UKB_460K.pigment_HAIR	classical_monocyte	0	1	0.24
UKB_460K.repro_MENARCHE_AGE	classical_monocyte	0	1	0.26
UKB_460K.repro_MENOPAUSE_AGE	classical_monocyte	0	1	0.62
PASS_CD_deLange2017	club_cell_of_bronchiole	0	1	0.82
PASS_Celiac	club_cell_of_bronchiole	0	1	0.77
PASS_IBD_deLange2017	club_cell_of_bronchiole	0	1	0.57
PASS_Lupus	club_cell_of_bronchiole	0	1	0.8
PASS_Multiple_sclerosis	club_cell_of_bronchiole	0	1	0.68
PASS_Primary_biliary_cirrhosis	club_cell_of_bronchiole	0	1	0.65
PASS_Rheumatoid_Arthritis	club_cell_of_bronchiole	0	1	0.97
PASS_UC_deLange2017	club_cell_of_bronchiole	0	1	0.54
UKB_460K.blood_EOSINOPHIL_COUNT	club_cell_of_bronchiole	0	1	0.89
UKB_460K.blood_LYMPHOCYTE_COUNT	club_cell_of_bronchiole	0	1	0.87
UKB_460K.blood_MEAN_CORPUSCULAR_HEMOGLOBIN	club_cell_of_bronchiole	0	1	0.35
UKB_460K.blood_MONOCYTE_COUNT	club_cell_of_bronchiole	0	1	0.62
UKB_460K.blood_PLATELET_COUNT	club_cell_of_bronchiole	0	0.95	0.51
UKB_460K.blood_RBC_DISTRIB_WIDTH	club_cell_of_bronchiole	0	0.53	0.9
UKB_460K.blood_RED_COUNT	club_cell_of_bronchiole	0	1	0.82
UKB_460K.blood_WHITE_COUNT	club_cell_of_bronchiole	0	1	0.69
UKB_460K.disease_AID_ALL	club_cell_of_bronchiole	0	1	0.35
UKB_460K.disease_ALLERGY_ECZEMA_DIAGNOSED	club_cell_of_bronchiole	0	0.91	0.93
UKB_460K.disease_ASTHMA_DIAGNOSED	club_cell_of_bronchiole	0	1	0.96
UKB_460K.disease_HYPOTHYROIDISM_SELF_REP	club_cell_of_bronchiole	0	1	0.65
UKB_460K.disease_RESPIRATORY_ENT	club_cell_of_bronchiole	0	1	0.88
PASS_ADHD_Demontis2018	club_cell_of_bronchiole	0	0.59	0.44
PASS_Alzheimers_Jansen2019	club_cell_of_bronchiole	0	1	0.73
PASS_BIP_Stahl2019	club_cell_of_bronchiole	0	0.83	0.66
PASS_DrinksPerWeek_Liu2019	club_cell_of_bronchiole	0	1	0.67
PASS_GeneralRiskTolerance_KarlssonLinner2019	club_cell_of_bronchiole	0	1	0.71
PASS_Insomnia_Jansen2019	club_cell_of_bronchiole	0	1	0.35
PASS_Intelligence_SavageJansen2018	club_cell_of_bronchiole	0	1	0.72
PASS_MDD_Howard2019	club_cell_of_bronchiole	0	1	0.74
PASS_ReactionTime_Davies2018	club_cell_of_bronchiole	0	1	0.74
PASS_SWB	club_cell_of_bronchiole	0	0.49	0.86
PASS_Schizophrenia_Pardinas2018	club_cell_of_bronchiole	0	0.99	0.77
PASS_SleepDuration_Dashti2019	club_cell_of_bronchiole	0	1	0.86
PASS_VerbalNumericReasoning_Davies2018	club_cell_of_bronchiole	0	1	0.75
PASS_Worry_Nagel2018	club_cell_of_bronchiole	0	1	0.91
UKB_460K.body_BMIz	club_cell_of_bronchiole	0	1	0.97
UKB_460K.cov_EDU_COLLEGE	club_cell_of_bronchiole	0	1	0.9
UKB_460K.cov_EDU_YEARS	club_cell_of_bronchiole	0	1	0.96
UKB_460K.cov_SMOKING_STATUS	club_cell_of_bronchiole	0	0.93	0.92
UKB_460K.mental_NEUROTICISM	club_cell_of_bronchiole	0	1	0.58
UKB_460K.other_MORNINGPERSON	club_cell_of_bronchiole	0	1	0.9
UKB_460K.repro_NumberChildrenEverBorn_Pooled	club_cell_of_bronchiole	0	0.14	0.64
PASS_AtrialFibrillation_Nielsen2018	club_cell_of_bronchiole	0	1	0.039
PASS_Coronary_Artery_Disease	club_cell_of_bronchiole	0	0.39	0.62
UKB_460K.bp_DIASTOLICadjMEDz	club_cell_of_bronchiole	0	1	0.95
UKB_460K.bp_SYSTOLICadjMEDz	club_cell_of_bronchiole	0	1	0.3
UKB_460K.disease_CARDIOVASCULAR	club_cell_of_bronchiole	0	1	0.79
UKB_460K.disease_HYPERTENSION_DIAGNOSED	club_cell_of_bronchiole	0	1	0.54
PASS_FastingGlucose_Manning	club_cell_of_bronchiole	0	0.83	0.36
UKB_460K.biochemistry_AlanineAminotransferase	club_cell_of_bronchiole	0.045	0.23	0.36
UKB_460K.biochemistry_AlkalinePhosphatase	club_cell_of_bronchiole	0.045	0.19	0.47
UKB_460K.biochemistry_Cholesterol	club_cell_of_bronchiole	0	0.95	0.89
UKB_460K.biochemistry_Glucose	club_cell_of_bronchiole	0	1	0.65
UKB_460K.biochemistry_HDLcholesterol	club_cell_of_bronchiole	0	1	0.33
UKB_460K.biochemistry_HbA1c	club_cell_of_bronchiole	0	0.88	0.47
UKB_460K.biochemistry_LDLdirect	club_cell_of_bronchiole	0	0.76	0.69
UKB_460K.biochemistry_SHBG	club_cell_of_bronchiole	0	0.8	0.93
UKB_460K.biochemistry_Testosterone_Male	club_cell_of_bronchiole	0	1	0.86
UKB_460K.biochemistry_TotalBilirubin	club_cell_of_bronchiole	0	0.94	0.83
UKB_460K.biochemistry_TotalProtein	club_cell_of_bronchiole	0	1	0.39
UKB_460K.biochemistry_Triglycerides	club_cell_of_bronchiole	0	1	0.72
PASS_Type_1_Diabetes	club_cell_of_bronchiole	0	1	0.61
PASS_Type_2_Diabetes	club_cell_of_bronchiole	0	1	0.55
UKB_460K.bmd_HEEL_TSCOREz	club_cell_of_bronchiole	0	1	0.96
UKB_460K.body_BALDING1	club_cell_of_bronchiole	0	1	0.95
UKB_460K.body_HEIGHTz	club_cell_of_bronchiole	0	1	0.17
UKB_460K.body_WHRadjBMIz	club_cell_of_bronchiole	0.18	0.16	0.72
UKB_460K.cancer_BREAST	club_cell_of_bronchiole	0	0.61	0.15
UKB_460K.impedance_BASAL_METABOLIC_RATEz	club_cell_of_bronchiole	0	1	0.57
UKB_460K.lung_FEV1FVCzSMOKE	club_cell_of_bronchiole	0.045	0.35	0.92
UKB_460K.lung_FVCzSMOKE	club_cell_of_bronchiole	0	0.83	0.96
UKB_460K.pigment_HAIR	club_cell_of_bronchiole	0	0.89	0.14
UKB_460K.repro_MENARCHE_AGE	club_cell_of_bronchiole	0	1	0.82
UKB_460K.repro_MENOPAUSE_AGE	club_cell_of_bronchiole	0	1	0.44
PASS_CD_deLange2017	dendritic_cell	0.065	0.057	0.076
PASS_Celiac	dendritic_cell	0	0.42	0.65
PASS_IBD_deLange2017	dendritic_cell	0.11	0.02	0.05
PASS_Lupus	dendritic_cell	0.016	0.046	0.039
PASS_Multiple_sclerosis	dendritic_cell	0.11	0.077	0.22
PASS_Primary_biliary_cirrhosis	dendritic_cell	0.016	0.17	0.06
PASS_Rheumatoid_Arthritis	dendritic_cell	0.097	0.067	0.42
PASS_UC_deLange2017	dendritic_cell	0.032	0.034	0.15
UKB_460K.blood_EOSINOPHIL_COUNT	dendritic_cell	0.016	0.37	0.34
UKB_460K.blood_LYMPHOCYTE_COUNT	dendritic_cell	0.35	0.02	0.039
UKB_460K.blood_MEAN_CORPUSCULAR_HEMOGLOBIN	dendritic_cell	0	1	0.68
UKB_460K.blood_MONOCYTE_COUNT	dendritic_cell	0	0.46	0.16
UKB_460K.blood_PLATELET_COUNT	dendritic_cell	0	0.85	0.66
UKB_460K.blood_RBC_DISTRIB_WIDTH	dendritic_cell	0	1	0.36
UKB_460K.blood_RED_COUNT	dendritic_cell	0	1	0.48
UKB_460K.blood_WHITE_COUNT	dendritic_cell	0	0.24	0.38
UKB_460K.disease_AID_ALL	dendritic_cell	0.74	0.02	0.026
UKB_460K.disease_ALLERGY_ECZEMA_DIAGNOSED	dendritic_cell	0.16	0.02	0.24
UKB_460K.disease_ASTHMA_DIAGNOSED	dendritic_cell	0.27	0.02	0.12
UKB_460K.disease_HYPOTHYROIDISM_SELF_REP	dendritic_cell	0.39	0.034	0.039
UKB_460K.disease_RESPIRATORY_ENT	dendritic_cell	0.18	0.046	0.085
PASS_ADHD_Demontis2018	dendritic_cell	0	1	0.91
PASS_Alzheimers_Jansen2019	dendritic_cell	0	0.77	0.89
PASS_BIP_Stahl2019	dendritic_cell	0	1	0.22
PASS_DrinksPerWeek_Liu2019	dendritic_cell	0	0.52	0.57
PASS_GeneralRiskTolerance_KarlssonLinner2019	dendritic_cell	0.016	0.52	0.85
PASS_Insomnia_Jansen2019	dendritic_cell	0	1	0.95
PASS_Intelligence_SavageJansen2018	dendritic_cell	0	0.73	0.82
PASS_MDD_Howard2019	dendritic_cell	0	1	0.56
PASS_ReactionTime_Davies2018	dendritic_cell	0	1	0.4
PASS_SWB	dendritic_cell	0	1	0.71
PASS_Schizophrenia_Pardinas2018	dendritic_cell	0	1	0.57
PASS_SleepDuration_Dashti2019	dendritic_cell	0	1	0.69
PASS_VerbalNumericReasoning_Davies2018	dendritic_cell	0	0.65	0.93
PASS_Worry_Nagel2018	dendritic_cell	0	1	0.51
UKB_460K.body_BMIz	dendritic_cell	0	1	0.45
UKB_460K.cov_EDU_COLLEGE	dendritic_cell	0	1	0.63
UKB_460K.cov_EDU_YEARS	dendritic_cell	0	1	0.97
UKB_460K.cov_SMOKING_STATUS	dendritic_cell	0	1	0.4
UKB_460K.mental_NEUROTICISM	dendritic_cell	0	1	0.25
UKB_460K.other_MORNINGPERSON	dendritic_cell	0	1	0.77
UKB_460K.repro_NumberChildrenEverBorn_Pooled	dendritic_cell	0	0.78	0.66
PASS_AtrialFibrillation_Nielsen2018	dendritic_cell	0	1	0.75
PASS_Coronary_Artery_Disease	dendritic_cell	0	1	0.58
UKB_460K.bp_DIASTOLICadjMEDz	dendritic_cell	0	1	0.58
UKB_460K.bp_SYSTOLICadjMEDz	dendritic_cell	0	1	0.67
UKB_460K.disease_CARDIOVASCULAR	dendritic_cell	0	0.89	0.19
UKB_460K.disease_HYPERTENSION_DIAGNOSED	dendritic_cell	0	0.7	0.33
PASS_FastingGlucose_Manning	dendritic_cell	0	1	0.48
UKB_460K.biochemistry_AlanineAminotransferase	dendritic_cell	0	0.91	0.13
UKB_460K.biochemistry_AlkalinePhosphatase	dendritic_cell	0	0.67	0.26
UKB_460K.biochemistry_Cholesterol	dendritic_cell	0	1	0.29
UKB_460K.biochemistry_Glucose	dendritic_cell	0	1	0.77
UKB_460K.biochemistry_HDLcholesterol	dendritic_cell	0	0.12	0.26
UKB_460K.biochemistry_HbA1c	dendritic_cell	0	1	0.57
UKB_460K.biochemistry_LDLdirect	dendritic_cell	0	1	0.25
UKB_460K.biochemistry_SHBG	dendritic_cell	0	1	0.75
UKB_460K.biochemistry_Testosterone_Male	dendritic_cell	0	1	0.87
UKB_460K.biochemistry_TotalBilirubin	dendritic_cell	0	1	0.42
UKB_460K.biochemistry_TotalProtein	dendritic_cell	0	0.8	0.91
UKB_460K.biochemistry_Triglycerides	dendritic_cell	0	1	0.49
PASS_Type_1_Diabetes	dendritic_cell	0	0.43	0.31
PASS_Type_2_Diabetes	dendritic_cell	0	1	0.94
UKB_460K.bmd_HEEL_TSCOREz	dendritic_cell	0	1	0.039
UKB_460K.body_BALDING1	dendritic_cell	0	0.95	0.33
UKB_460K.body_HEIGHTz	dendritic_cell	0	1	0.61
UKB_460K.body_WHRadjBMIz	dendritic_cell	0	1	0.45
UKB_460K.cancer_BREAST	dendritic_cell	0	0.85	0.86
UKB_460K.impedance_BASAL_METABOLIC_RATEz	dendritic_cell	0	1	0.65
UKB_460K.lung_FEV1FVCzSMOKE	dendritic_cell	0	1	0.11
UKB_460K.lung_FVCzSMOKE	dendritic_cell	0	1	0.93
UKB_460K.pigment_HAIR	dendritic_cell	0	0.46	0.63
UKB_460K.repro_MENARCHE_AGE	dendritic_cell	0	0.81	0.58
UKB_460K.repro_MENOPAUSE_AGE	dendritic_cell	0	0.42	0.61
PASS_CD_deLange2017	early_pro-B_cell	0	1	0.65
[truncated: 6,881 more rows]

[truncated: 5 more sheets: ST13 Results for TMS droplet, ST14 Results for TS FACS, ST18 Gold geneset, ST19 Fig.4D, ST21 Results for Zeisel et al]
